# Supplementary material for: PICKLE 2.0: A human protein-protein interaction meta-database employing data integration via genetic information ontology
Source: PLoS One. 2017 Oct 12;12(10):e0186039. doi: 10.1371/journal.pone.0186039 (PMC5638325; doi:10.1371/journal.pone.0186039)
Supplement: S5 Table — (XLSX) [file pone.0186039.s005.xlsx]

## Sheet: S5 Table
S5 Table. The number of interactions (degree) of the RHCP UniProt_IDs included in the PICKLE 2.0 (release 1) and PICKLE 1.0 interactomes
Note:	Column "comments" indicates the interactome in which the RHCP UniProt_ID is included (only PICKLE 2.0, only PICKLE 1.0 or both);
	Column "comments 2" indicates in which S4 Table category the UniProt_ID belongs - the UniProt_IDs are sorted based on their PICKLE 2.0 degree
UniProt ID	Degree in PICKLE 2.0	Degree in PICKLE 1.0	Primary Name in PICKLE 2.0	Primary Name in PICKLE 1.0	Comments	Comments 2
P0CG48	2184	1112	Polyubiquitin-C	Polyubiquitin-C	encountered in both interactomes
P05067	2010	124	Amyloid beta A4 protein	Amyloid beta A4 protein	encountered in both interactomes
P61956	1040	180	Small ubiquitin-related modifier 2	Small ubiquitin-related modifier 2	encountered in both interactomes
Q00987	734	251	E3 ubiquitin-protein ligase Mdm2	E3 ubiquitin-protein ligase Mdm2	encountered in both interactomes
P55854	635	46	Small ubiquitin-related modifier 3	Small ubiquitin-related modifier 3	encountered in both interactomes
P04637	611	476	Cellular tumor antigen p53	Cellular tumor antigen p53	encountered in both interactomes
P07900	581	196	Heat shock protein HSP 90-alpha	Heat shock protein HSP 90-alpha	encountered in both interactomes
P63165	561	292	Small ubiquitin-related modifier 1	Small ubiquitin-related modifier 1	encountered in both interactomes
P62993	557	341	Growth factor receptor-bound protein 2	Growth factor receptor-bound protein 2	encountered in both interactomes
P63104	503	471	14-3-3 protein zeta/delta	14-3-3 protein zeta/delta	encountered in both interactomes
Q9Y4K3	488	424	TNF receptor-associated factor 6	TNF receptor-associated factor 6	encountered in both interactomes
Q09472	477	331	Histone acetyltransferase p300	Histone acetyltransferase p300	encountered in both interactomes
P00533	474	313	Epidermal growth factor receptor	Epidermal growth factor receptor	encountered in both interactomes
P12931	432	351	Proto-oncogene tyrosine-protein kinase Src	Proto-oncogene tyrosine-protein kinase Src	encountered in both interactomes
P38398	416	201	Breast cancer type 1 susceptibility protein	Breast cancer type 1 susceptibility protein	encountered in both interactomes
Q13547	410	353	Histone deacetylase 1	Histone deacetylase 1	encountered in both interactomes
P68400	399	198	Casein kinase II subunit alpha	Casein kinase II subunit alpha	encountered in both interactomes
Q9Y6K9	390	304	NF-kappa-B essential modulator	NF-kappa-B essential modulator	encountered in both interactomes
P03372	388	312	Estrogen receptor	Estrogen receptor	encountered in both interactomes
P61981	356	335	14-3-3 protein gamma	14-3-3 protein gamma	encountered in both interactomes
P27348	350	311	14-3-3 protein theta	14-3-3 protein theta	encountered in both interactomes
P35222	347	240	Catenin beta-1	Catenin beta-1	encountered in both interactomes
P06241	344	237	Tyrosine-protein kinase Fyn	Tyrosine-protein kinase Fyn	encountered in both interactomes
Q92793	342	300	CREB-binding protein	CREB-binding protein	encountered in both interactomes
Q9UQL6	338	324	Histone deacetylase 5	Histone deacetylase 5	encountered in both interactomes
Q04206	337	243	Transcription factor p65	Transcription factor p65	encountered in both interactomes
Q14164	337	338	Inhibitor of nuclear factor kappa-B kinase subunit epsilon	Inhibitor of nuclear factor kappa-B kinase subunit epsilon	encountered in both interactomes
P62158	334	294	Calmodulin	Calmodulin	encountered in both interactomes
Q12933	331	205	TNF receptor-associated factor 2	TNF receptor-associated factor 2	encountered in both interactomes
Q15796	328	299	Mothers against decapentaplegic homolog 2	Mothers against decapentaplegic homolog 2	encountered in both interactomes
P63279	325	208	SUMO-conjugating enzyme UBC9	SUMO-conjugating enzyme UBC9	encountered in both interactomes
P10275	324	222	Androgen receptor	Androgen receptor	encountered in both interactomes
P84022	324	243	Mothers against decapentaplegic homolog 3	Mothers against decapentaplegic homolog 3	encountered in both interactomes
P00519	317	225	Tyrosine-protein kinase ABL1	Tyrosine-protein kinase ABL1	encountered in both interactomes
P40337	309	244	Von Hippel-Lindau disease tumor suppressor	Von Hippel-Lindau disease tumor suppressor	encountered in both interactomes
P04792	306	50	Heat shock protein beta-1	Heat shock protein beta-1	encountered in both interactomes
P54274	305	130	Telomeric repeat-binding factor 1	Telomeric repeat-binding factor 1	encountered in both interactomes
Q6A162	298		Keratin, type I cytoskeletal 40	Keratin, type I cytoskeletal 40	encountered only in PICKLE 2.0	common in RHCP
Q08379	297	51	Golgin subfamily A member 2	Golgin subfamily A member 2	encountered in both interactomes
P01106	295	453	Myc proto-oncogene protein	Myc proto-oncogene protein	encountered in both interactomes
P31749	286	194	RAC-alpha serine/threonine-protein kinase	RAC-alpha serine/threonine-protein kinase	encountered in both interactomes
P13612	277	18	Integrin alpha-4	Integrin alpha-4	encountered in both interactomes
P60369	277		Keratin-associated protein 10-3	Keratin-associated protein 10-3	encountered only in PICKLE 2.0	common in RHCP
P27986	276	217	Phosphatidylinositol 3-kinase regulatory subunit alpha	Phosphatidylinositol 3-kinase regulatory subunit alpha	encountered in both interactomes
P46934	276	118	E3 ubiquitin-protein ligase NEDD4	E3 ubiquitin-protein ligase NEDD4	encountered in both interactomes
P0CG47	274	133	Polyubiquitin-B	Polyubiquitin-B [Cleaved into: Ubiquitin]	encountered in both interactomes
O60341	270	61	Lysine-specific histone demethylase 1A	Lysine-specific histone demethylase 1A	encountered in both interactomes
P14373	270	64	Zinc finger protein RFP	Zinc finger protein RFP	encountered in both interactomes
P54253	269	172	Ataxin-1	Ataxin-1	encountered in both interactomes
P30480	265	275	HLA class I histocompatibility antigen, B-42 alpha chain	HLA class I histocompatibility antigen, B-42 alpha chain	encountered in both interactomes
P28482	263	204	Mitogen-activated protein kinase 1	Mitogen-activated protein kinase 1	encountered in both interactomes
P49841	257	220	Glycogen synthase kinase-3 beta	Glycogen synthase kinase-3 beta	encountered in both interactomes
Q92769	249	217	Histone deacetylase 2	Histone deacetylase 2	encountered in both interactomes
P62258	243	134	14-3-3 protein epsilon	14-3-3 protein epsilon	encountered in both interactomes
P34932	241	139	Heat shock 70 kDa protein 4	Heat shock 70 kDa protein 4	encountered in both interactomes
P16333	240	77	Cytoplasmic protein NCK1	Cytoplasmic protein NCK1	encountered in both interactomes
Q8TBB1	240	55	E3 ubiquitin-protein ligase LNX	E3 ubiquitin-protein ligase LNX	encountered in both interactomes
P05412	237	189	Transcription factor AP-1	Transcription factor AP-1	encountered in both interactomes
P42858	237	109	Huntingtin	Huntingtin	encountered in both interactomes
Q15554	237	191	Telomeric repeat-binding factor 2	Telomeric repeat-binding factor 2	encountered in both interactomes
P17252	234	195	Protein kinase C alpha type	Protein kinase C alpha type	encountered in both interactomes
Q5S007	233	10	Leucine-rich repeat serine/threonine-protein kinase 2	Leucine-rich repeat serine/threonine-protein kinase 2	encountered in both interactomes
Q7Z3S9	233	2	Notch homolog 2 N-terminal-like protein	Notch homolog 2 N-terminal-like protein	encountered in both interactomes
Q8IUH5	233	6	Palmitoyltransferase ZDHHC17	Palmitoyltransferase ZDHHC17	encountered in both interactomes
P60709	229	161	Actin, cytoplasmic 1	Actin, cytoplasmic 1	encountered in both interactomes
Q99750	225	138	MyoD family inhibitor	MyoD family inhibitor	encountered in both interactomes
P11142	223	147	Heat shock cognate 71 kDa protein	Heat shock cognate 71 kDa protein	encountered in both interactomes
P06400	222	196	Retinoblastoma-associated protein	Retinoblastoma-associated protein	encountered in both interactomes
P38936	221	180	Cyclin-dependent kinase inhibitor 1	Cyclin-dependent kinase inhibitor 1	encountered in both interactomes
P67870	220	159	Casein kinase II subunit beta	Casein kinase II subunit beta	encountered in both interactomes
Q04864	220	46	Proto-oncogene c-Rel	Proto-oncogene c-Rel	encountered in both interactomes
P51668	219	111	Ubiquitin-conjugating enzyme E2 D1	Ubiquitin-conjugating enzyme E2 D1	encountered in both interactomes
Q13526	219	158	Peptidyl-prolyl cis-trans isomerase NIMA-interacting 1	Peptidyl-prolyl cis-trans isomerase NIMA-interacting 1	encountered in both interactomes
Q16695	219	88	Histone H3.1t	Histone H3.1t	encountered in both interactomes
P31946	217	195	14-3-3 protein beta/alpha	14-3-3 protein beta/alpha	encountered in both interactomes
Q96SB4	214	28	SRSF protein kinase 1	Serine/threonine-protein kinase SRPK1	encountered in both interactomes
P12004	211	162	Proliferating cell nuclear antigen	Proliferating cell nuclear antigen	encountered in both interactomes
Q92993	211	135	Histone acetyltransferase KAT5	Histone acetyltransferase KAT5	encountered in both interactomes
Q13485	210	180	Mothers against decapentaplegic homolog 4	Mothers against decapentaplegic homolog 4	encountered in both interactomes
P06493	209	148	Cyclin-dependent kinase 1	Cyclin-dependent kinase 1	encountered in both interactomes
P50222	208	9	Homeobox protein MOX-2	Homeobox protein MOX-2	encountered in both interactomes
P60409	208		Keratin-associated protein 10-7	Keratin-associated protein 10-7	encountered only in PICKLE 2.0	common in RHCP
Q13077	207	79	TNF receptor-associated factor 1	TNF receptor-associated factor 1	encountered in both interactomes
P08047	206	183	Transcription factor Sp1	Transcription factor Sp1	encountered in both interactomes
P22681	205	144	E3 ubiquitin-protein ligase CBL	E3 ubiquitin-protein ligase CBL	encountered in both interactomes
P14618	203	39	Pyruvate kinase PKM	Pyruvate kinase isozymes M1/M2	encountered in both interactomes
P40763	203	133	Signal transducer and activator of transcription 3	Signal transducer and activator of transcription 3	encountered in both interactomes
P62979	203	76	Ubiquitin-40S ribosomal protein S27a	Ubiquitin-40S ribosomal protein S27a	encountered in both interactomes
P62987	203	81	Ubiquitin-60S ribosomal protein L40	Ubiquitin-60S ribosomal protein L40	encountered in both interactomes
Q9NUX5	203	39	Protection of telomeres protein 1	Protection of telomeres protein 1	encountered in both interactomes
Q9UNE7	203	103	E3 ubiquitin-protein ligase CHIP	E3 ubiquitin-protein ligase CHIP	encountered in both interactomes
P61077	202	113	Ubiquitin-conjugating enzyme E2 D3	Ubiquitin-conjugating enzyme E2 D3	encountered in both interactomes
P68431	201	149	Histone H3.1	Histone H3.1	encountered in both interactomes
P27361	200	148	Mitogen-activated protein kinase 3	Mitogen-activated protein kinase 3	encountered in both interactomes
P78362	197	12	SRSF protein kinase 2	Serine/threonine-protein kinase SRPK2	encountered in both interactomes
P46108	195	84	Adapter molecule crk	Adapter molecule crk	encountered in both interactomes
P04150	194	169	Glucocorticoid receptor	Glucocorticoid receptor	encountered in both interactomes
P19174	193	161	1-phosphatidylinositol 4,5-bisphosphate phosphodiesterase gamma-1	1-phosphatidylinositol-4,5-bisphosphate phosphodiesterase gamma-1	encountered in both interactomes
P24928	193	140	DNA-directed RNA polymerase II subunit RPB1	DNA-directed RNA polymerase II subunit RPB1	encountered in both interactomes
P62837	192	113	Ubiquitin-conjugating enzyme E2 D2	Ubiquitin-conjugating enzyme E2 D2	encountered in both interactomes
P17612	191	167	cAMP-dependent protein kinase catalytic subunit alpha	cAMP-dependent protein kinase catalytic subunit alpha	encountered in both interactomes
P62136	191	106	Serine/threonine-protein phosphatase PP1-alpha catalytic subunit	Serine/threonine-protein phosphatase PP1-alpha catalytic subunit	encountered in both interactomes
O15379	190	157	Histone deacetylase 3	Histone deacetylase 3	encountered in both interactomes
P23508	190	227	Colorectal mutant cancer protein	Colorectal mutant cancer protein	encountered in both interactomes
Q96B97	190	58	SH3 domain-containing kinase-binding protein 1	SH3 domain-containing kinase-binding protein 1	encountered in both interactomes
Q16637	189	180	Survival motor neuron protein	Survival motor neuron protein	encountered in both interactomes
P12956	187	151	X-ray repair cross-complementing protein 6	X-ray repair cross-complementing protein 6	encountered in both interactomes
P36897	187	165	TGF-beta receptor type-1	TGF-beta receptor type-1	encountered in both interactomes
P08670	185	162	Vimentin	Vimentin	encountered in both interactomes
P62805	185	131	Histone H4	Histone H4	encountered in both interactomes
Q15843	185	105	NEDD8	NEDD8	encountered in both interactomes
O14964	184	113	Hepatocyte growth factor-regulated tyrosine kinase substrate	Hepatocyte growth factor-regulated tyrosine kinase substrate	encountered in both interactomes
P15884	184	38	Transcription factor 4	Transcription factor 4	encountered in both interactomes
Q99759	183	170	Mitogen-activated protein kinase kinase kinase 3	Mitogen-activated protein kinase kinase kinase 3	encountered in both interactomes
P09874	182	130	Poly "ADP-ribose" polymerase 1	Poly [ADP-ribose] polymerase 1	encountered in both interactomes
P29590	182	108	Protein PML	Protein PML	encountered in both interactomes
P36873	182	55	Serine/threonine-protein phosphatase PP1-gamma catalytic subunit	Serine/threonine-protein phosphatase PP1-gamma catalytic subunit	encountered in both interactomes
Q01844	182	150	RNA-binding protein EWS	RNA-binding protein EWS	encountered in both interactomes
P55072	181	99	Transitional endoplasmic reticulum ATPase	Transitional endoplasmic reticulum ATPase	encountered in both interactomes
P63000	178	148	Ras-related C3 botulinum toxin substrate 1	Ras-related C3 botulinum toxin substrate 1	encountered in both interactomes
Q15323	178	15	Keratin, type I cuticular Ha1	Keratin, type I cuticular Ha1	encountered in both interactomes
P01100	177	144	Proto-oncogene c-Fos	Proto-oncogene c-Fos	encountered in both interactomes
P31947	177	157	14-3-3 protein sigma	14-3-3 protein sigma	encountered in both interactomes
Q92831	177	134	Histone acetyltransferase KAT2B	Histone acetyltransferase KAT2B	encountered in both interactomes
P19438	176	135	Tumor necrosis factor receptor superfamily member 1A	Tumor necrosis factor receptor superfamily member 1A	encountered in both interactomes
Q13616	176	98	Cullin-1	Cullin-1	encountered in both interactomes
P68104	175	147	Elongation factor 1-alpha 1	Elongation factor 1-alpha 1	encountered in both interactomes
Q93062	175	53	RNA-binding protein with multiple splicing	RNA-binding protein with multiple splicing	encountered in both interactomes
Q16539	173	143	Mitogen-activated protein kinase 14	Mitogen-activated protein kinase 14	encountered in both interactomes
Q16659	173	165	Mitogen-activated protein kinase 6	Mitogen-activated protein kinase 6	encountered in both interactomes
P24941	172	135	Cyclin-dependent kinase 2	Cyclin-dependent kinase 2	encountered in both interactomes
O00560	171	33	Syntenin-1	Syntenin-1	encountered in both interactomes
P04183	170	158	Thymidine kinase, cytosolic	Thymidine kinase, cytosolic	encountered in both interactomes
P60953	170	150	Cell division control protein 42 homolog	Cell division control protein 42 homolog	encountered in both interactomes
P61088	170	68	Ubiquitin-conjugating enzyme E2 N	Ubiquitin-conjugating enzyme E2 N	encountered in both interactomes
Q9BRK4	170	16	Leucine zipper putative tumor suppressor 2	Leucine zipper putative tumor suppressor 2	encountered in both interactomes
P42574	169	146	Caspase-3	Caspase-3	encountered in both interactomes
Q03135	168	108	Caveolin-1	Caveolin-1	encountered in both interactomes
Q15797	168	149	Mothers against decapentaplegic homolog 1	Mothers against decapentaplegic homolog 1	encountered in both interactomes
P45983	167	112	Mitogen-activated protein kinase 8	Mitogen-activated protein kinase 8	encountered in both interactomes
Q16543	166	72	Hsp90 co-chaperone Cdc37	Hsp90 co-chaperone Cdc37	encountered in both interactomes
Q5JR59	166	22	Microtubule-associated tumor suppressor candidate 2	Microtubule-associated tumor suppressor candidate 2	encountered in both interactomes
Q8IUQ4	165	66	E3 ubiquitin-protein ligase SIAH1	E3 ubiquitin-protein ligase SIAH1	encountered in both interactomes
Q9UMX0	165	51	Ubiquilin-1	Ubiquilin-1	encountered in both interactomes
P04049	163	122	RAF proto-oncogene serine/threonine-protein kinase	RAF proto-oncogene serine/threonine-protein kinase	encountered in both interactomes
P04626	163	126	Receptor tyrosine-protein kinase erbB-2	Receptor tyrosine-protein kinase erbB-2	encountered in both interactomes
Q16531	163	97	DNA damage-binding protein 1	DNA damage-binding protein 1	encountered in both interactomes
Q9NRR5	163	159	Ubiquilin-4	Ubiquilin-4	encountered in both interactomes
Q13501	162	65	Sequestosome-1	Sequestosome-1	encountered in both interactomes
Q96ST3	161	148	Paired amphipathic helix protein Sin3a	Paired amphipathic helix protein Sin3a	encountered in both interactomes
P60411	160		Keratin-associated protein 10-9	Keratin-associated protein 10-9	encountered only in PICKLE 2.0	common in RHCP
Q96EB6	159	129	NAD-dependent protein deacetylase sirtuin-1	NAD-dependent deacetylase sirtuin-1	encountered in both interactomes
Q96PU5	159	31	E3 ubiquitin-protein ligase NEDD4-like	E3 ubiquitin-protein ligase NEDD4-like	encountered in both interactomes
P51532	158	133	Transcription activator BRG1	Transcription activator BRG1	encountered in both interactomes
Q9Y297	158	80	F-box/WD repeat-containing protein 1A	F-box/WD repeat-containing protein 1A	encountered in both interactomes
O60260	156	91	E3 ubiquitin-protein ligase parkin	E3 ubiquitin-protein ligase parkin	encountered in both interactomes
P08107	156	111	Heat shock 70 kDa protein 1A/1B	Heat shock 70 kDa protein 1A/1B	encountered in both interactomes
O14920	154	104	Inhibitor of nuclear factor kappa-B kinase subunit beta	Inhibitor of nuclear factor kappa-B kinase subunit beta	encountered in both interactomes
P37840	153	95	Alpha-synuclein	Alpha-synuclein	encountered in both interactomes
P53350	153	107	Serine/threonine-protein kinase PLK1	Serine/threonine-protein kinase PLK1	encountered in both interactomes
P60410	153		Keratin-associated protein 10-8	Keratin-associated protein 10-8	encountered only in PICKLE 2.0	common in RHCP
O43463	152	51	Histone-lysine N-methyltransferase SUV39H1	Histone-lysine N-methyltransferase SUV39H1	encountered in both interactomes
P78527	152	127	DNA-dependent protein kinase catalytic subunit	DNA-dependent protein kinase catalytic subunit	encountered in both interactomes
Q9Y478	152	163	5'-AMP-activated protein kinase subunit beta-1	5'-AMP-activated protein kinase subunit beta-1	encountered in both interactomes
P19838	151	164	Nuclear factor NF-kappa-B p105 subunit	Nuclear factor NF-kappa-B p105 subunit	encountered in both interactomes
P37231	151	91	Peroxisome proliferator-activated receptor gamma	Peroxisome proliferator-activated receptor gamma	encountered in both interactomes
P68133	151	130	Actin, alpha skeletal muscle	Actin, alpha skeletal muscle	encountered in both interactomes
Q13137	151	65	Calcium-binding and coiled-coil domain-containing protein 2	Calcium-binding and coiled-coil domain-containing protein 2	encountered in both interactomes
Q92905	150	88	COP9 signalosome complex subunit 5	COP9 signalosome complex subunit 5	encountered in both interactomes
P06748	149	109	Nucleophosmin	Nucleophosmin	encountered in both interactomes
P11021	148	94	78 kDa glucose-regulated protein	78 kDa glucose-regulated protein	encountered in both interactomes
P45973	148	66	Chromobox protein homolog 5	Chromobox protein homolog 5	encountered in both interactomes
P20226	147	135	TATA-box-binding protein	TATA-box-binding protein	encountered in both interactomes
P29353	147	142	SHC-transforming protein 1	SHC-transforming protein 1	encountered in both interactomes
Q06124	146	128	Tyrosine-protein phosphatase non-receptor type 11	Tyrosine-protein phosphatase non-receptor type 11	encountered in both interactomes
P06239	145	118	Tyrosine-protein kinase Lck	Tyrosine-protein kinase Lck	encountered in both interactomes
P25963	145	113	NF-kappa-B inhibitor alpha	NF-kappa-B inhibitor alpha	encountered in both interactomes
O15111	144	97	Inhibitor of nuclear factor kappa-B kinase subunit alpha	Inhibitor of nuclear factor kappa-B kinase subunit alpha	encountered in both interactomes
P07948	144	117	Tyrosine-protein kinase Lyn	Tyrosine-protein kinase Lyn	encountered in both interactomes
O43318	143	101	Mitogen-activated protein kinase kinase kinase 7	Mitogen-activated protein kinase kinase kinase 7	encountered in both interactomes
P42224	143	105	Signal transducer and activator of transcription 1-alpha/beta	Signal transducer and activator of transcription 1-alpha/beta	encountered in both interactomes
P25054	142	126	Adenomatous polyposis coli protein	Adenomatous polyposis coli protein	encountered in both interactomes
P56524	142	117	Histone deacetylase 4	Histone deacetylase 4	encountered in both interactomes
P36406	140	35	E3 ubiquitin-protein ligase TRIM23	E3 ubiquitin-protein ligase TRIM23	encountered in both interactomes
P40692	140	58	DNA mismatch repair protein Mlh1	DNA mismatch repair protein Mlh1	encountered in both interactomes
Q08117	140	23	Amino-terminal enhancer of split	Amino-terminal enhancer of split	encountered in both interactomes
Q13263	140	80	Transcription intermediary factor 1-beta	Transcription intermediary factor 1-beta	encountered in both interactomes
O75376	139	133	Nuclear receptor corepressor 1	Nuclear receptor corepressor 1	encountered in both interactomes
P25788	139	43	Proteasome subunit alpha type-3	Proteasome subunit alpha type-3	encountered in both interactomes
Q05655	139	110	Protein kinase C delta type	Protein kinase C delta type	encountered in both interactomes
Q15714	139	160	TSC22 domain family protein 1	TSC22 domain family protein 1	encountered in both interactomes
Q9NYB0	139	17	Telomeric repeat-binding factor 2-interacting protein 1	Telomeric repeat-binding factor 2-interacting protein 1	encountered in both interactomes
Q99728	138	69	BRCA1-associated RING domain protein 1	BRCA1-associated RING domain protein 1	encountered in both interactomes
Q9HCE7	138	97	E3 ubiquitin-protein ligase SMURF1	E3 ubiquitin-protein ligase SMURF1	encountered in both interactomes
Q13233	137	120	Mitogen-activated protein kinase kinase kinase 1	Mitogen-activated protein kinase kinase kinase 1	encountered in both interactomes
Q99816	137	59	Tumor susceptibility gene 101 protein	Tumor susceptibility gene 101 protein	encountered in both interactomes
P61978	136	72	Heterogeneous nuclear ribonucleoprotein K	Heterogeneous nuclear ribonucleoprotein K	encountered in both interactomes
P62330	136	133	ADP-ribosylation factor 6	ADP-ribosylation factor 6	encountered in both interactomes
P67775	136	126	Serine/threonine-protein phosphatase 2A catalytic subunit alpha isoform	Serine/threonine-protein phosphatase 2A catalytic subunit alpha isoform	encountered in both interactomes
Q13618	136	50	Cullin-3	Cullin-3	encountered in both interactomes
Q14790	136	95	Caspase-8	Caspase-8	encountered in both interactomes
Q8N726	136	101	Cyclin-dependent kinase inhibitor 2A, isoform 4	Cyclin-dependent kinase inhibitor 2A, isoform 4	encountered in both interactomes
Q9Y5K5	136	86	Ubiquitin carboxyl-terminal hydrolase isozyme L5	Ubiquitin carboxyl-terminal hydrolase isozyme L5	encountered in both interactomes
P10276	135	101	Retinoic acid receptor alpha	Retinoic acid receptor alpha	encountered in both interactomes
P63208	135	77	S-phase kinase-associated protein 1	S-phase kinase-associated protein 1	encountered in both interactomes
Q8NHQ1	135	37	Centrosomal protein of 70 kDa	Centrosomal protein of 70 kDa	encountered in both interactomes
Q96J02	135	76	E3 ubiquitin-protein ligase Itchy homolog	E3 ubiquitin-protein ligase Itchy homolog	encountered in both interactomes
Q15047	134	121	Histone-lysine N-methyltransferase SETDB1	Histone-lysine N-methyltransferase SETDB1	encountered in both interactomes
P22314	133	26	Ubiquitin-like modifier-activating enzyme 1	Ubiquitin-like modifier-activating enzyme 1	encountered in both interactomes
Q5T3J3	133	130	Ligand-dependent nuclear receptor-interacting factor 1	Ligand-dependent nuclear receptor-interacting factor 1	encountered in both interactomes
Q9UQ35	133	123	Serine/arginine repetitive matrix protein 2	Serine/arginine repetitive matrix protein 2	encountered in both interactomes
P46379	132	85	Large proline-rich protein BAG6	Large proline-rich protein BAG6	encountered in both interactomes
P52292	132	65	Importin subunit alpha-1	Importin subunit alpha-2	encountered in both interactomes
Q15834	132	131	Coiled-coil domain-containing protein 85B	Coiled-coil domain-containing protein 85B	encountered in both interactomes
Q16665	132	88	Hypoxia-inducible factor 1-alpha	Hypoxia-inducible factor 1-alpha	encountered in both interactomes
O43889	131	112	Cyclic AMP-responsive element-binding protein 3	Cyclic AMP-responsive element-binding protein 3	encountered in both interactomes
Q9BYV2	131	7	Tripartite motif-containing protein 54	Tripartite motif-containing protein 54	encountered in both interactomes
O60739	130	159	Eukaryotic translation initiation factor 1b	Eukaryotic translation initiation factor 1b	encountered in both interactomes
P43405	130	99	Tyrosine-protein kinase SYK	Tyrosine-protein kinase SYK	encountered in both interactomes
P62877	130	66	E3 ubiquitin-protein ligase RBX1	E3 ubiquitin-protein ligase RBX1	encountered in both interactomes
Q07666	130	60	KH domain-containing, RNA-binding, signal transduction-associated protein 1	KH domain-containing, RNA-binding, signal transduction-associated protein 1	encountered in both interactomes
Q93009	129	78	Ubiquitin carboxyl-terminal hydrolase 7	Ubiquitin carboxyl-terminal hydrolase 7	encountered in both interactomes
Q13200	128	48	26S proteasome non-ATPase regulatory subunit 2	26S proteasome non-ATPase regulatory subunit 2	encountered in both interactomes
Q13315	128	92	Serine-protein kinase ATM	Serine-protein kinase ATM	encountered in both interactomes
Q99558	128	133	Mitogen-activated protein kinase kinase kinase 14	Mitogen-activated protein kinase kinase kinase 14	encountered in both interactomes
P13010	127	87	X-ray repair cross-complementing protein 5	X-ray repair cross-complementing protein 5	encountered in both interactomes
P19793	127	109	Retinoic acid receptor RXR-alpha	Retinoic acid receptor RXR-alpha	encountered in both interactomes
Q9UBN7	127	77	Histone deacetylase 6	Histone deacetylase 6	encountered in both interactomes
O75400	126	110	Pre-mRNA-processing factor 40 homolog A	Pre-mRNA-processing factor 40 homolog A	encountered in both interactomes
P11171	126	133	Protein 4.1	Protein 4.1	encountered in both interactomes
P25786	126	50	Proteasome subunit alpha type-1	Proteasome subunit alpha type-1	encountered in both interactomes
Q01094	126	94	Transcription factor E2F1	Transcription factor E2F1	encountered in both interactomes
Q9HAU4	126	108	E3 ubiquitin-protein ligase SMURF2	E3 ubiquitin-protein ligase SMURF2	encountered in both interactomes
P16104	125	193	Histone H2AX	Histone H2A.x	encountered in both interactomes
P54725	125	33	UV excision repair protein RAD23 homolog A	UV excision repair protein RAD23 homolog A	encountered in both interactomes
Q05516	125	100	Zinc finger and BTB domain-containing protein 16	Zinc finger and BTB domain-containing protein 16	encountered in both interactomes
Q12873	125	120	Chromodomain-helicase-DNA-binding protein 3	Chromodomain-helicase-DNA-binding protein 3	encountered in both interactomes
O15162	124	76	Phospholipid scramblase 1	Phospholipid scramblase 1	encountered in both interactomes
P12236	124	29	ADP/ATP translocase 3	ADP/ATP translocase 3	encountered in both interactomes
P42771	124	83	Cyclin-dependent kinase inhibitor 2A, isoforms 1/2/3	Cyclin-dependent kinase inhibitor 2A, isoforms 1/2/3	encountered in both interactomes
O14980	123	86	Exportin-1	Exportin-1	encountered in both interactomes
Q9NRI5	123	117	Disrupted in schizophrenia 1 protein	Disrupted in schizophrenia 1 protein	encountered in both interactomes
P51965	122	64	Ubiquitin-conjugating enzyme E2 E1	Ubiquitin-conjugating enzyme E2 E1	encountered in both interactomes
P55036	122	86	26S proteasome non-ATPase regulatory subunit 4	26S proteasome non-ATPase regulatory subunit 4	encountered in both interactomes
P61586	122	102	Transforming protein RhoA	Transforming protein RhoA	encountered in both interactomes
O15198	121	117	Mothers against decapentaplegic homolog 9	Mothers against decapentaplegic homolog 9	encountered in both interactomes
Q00610	121	89	Clathrin heavy chain 1	Clathrin heavy chain 1	encountered in both interactomes
Q15428	121	118	Splicing factor 3A subunit 2	Splicing factor 3A subunit 2	encountered in both interactomes
Q6ZW49	121	29	PAX-interacting protein 1	PAX-interacting protein 1	encountered in both interactomes
P08581	120	49	Hepatocyte growth factor receptor	Hepatocyte growth factor receptor	encountered in both interactomes
P21333	120	89	Filamin-A	Filamin-A	encountered in both interactomes
P63244	120	80	Guanine nucleotide-binding protein subunit beta-2-like 1	Guanine nucleotide-binding protein subunit beta-2-like 1	encountered in both interactomes
Q13363	120	82	C-terminal-binding protein 1	C-terminal-binding protein 1	encountered in both interactomes
Q8N6Y0	120	35	Usher syndrome type-1C protein-binding protein 1	Usher syndrome type-1C protein-binding protein 1	encountered in both interactomes
P08238	119	105	Heat shock protein HSP 90-beta	Heat shock protein HSP 90-beta	encountered in both interactomes
P78352	119	111	Disks large homolog 4	Disks large homolog 4	encountered in both interactomes
O60674	118	101	Tyrosine-protein kinase JAK2	Tyrosine-protein kinase JAK2	encountered in both interactomes
P07550	118	43	Beta-2 adrenergic receptor	Beta-2 adrenergic receptor	encountered in both interactomes
P20333	118	108	Tumor necrosis factor receptor superfamily member 1B	Tumor necrosis factor receptor superfamily member 1B	encountered in both interactomes
Q9H4L7	118	2	SWI/SNF-related matrix-associated actin-dependent regulator of chromatin subfamily A containing DEAD/H box 1	SWI/SNF-related matrix-associated actin-dependent regulator of chromatin subfamily A containing DEAD/H box 1	encountered in both interactomes
P22736	117	83	Nuclear receptor subfamily 4 group A member 1	Nuclear receptor subfamily 4 group A member 1	encountered in both interactomes
P60520	117	71	Gamma-aminobutyric acid receptor-associated protein-like 2	Gamma-aminobutyric acid receptor-associated protein-like 2 (GABA(A) receptor-associated protein-like 2)	encountered in both interactomes
Q71U36	117	74	Tubulin alpha-1A chain	Tubulin alpha-1A chain	encountered in both interactomes
Q99873	117	82	Protein arginine N-methyltransferase 1	Protein arginine N-methyltransferase 1	encountered in both interactomes
Q9UKE5	117	113	TRAF2 and NCK-interacting protein kinase	TRAF2 and NCK-interacting protein kinase	encountered in both interactomes
O43765	116	29	Small glutamine-rich tetratricopeptide repeat-containing protein alpha	Small glutamine-rich tetratricopeptide repeat-containing protein alpha	encountered in both interactomes
P10415	116	101	Apoptosis regulator Bcl-2	Apoptosis regulator Bcl-2	encountered in both interactomes
P11802	116	102	Cyclin-dependent kinase 4	Cyclin-dependent kinase 4	encountered in both interactomes
Q09028	116	94	Histone-binding protein RBBP4	Histone-binding protein RBBP4	encountered in both interactomes
Q13404	116	28	Ubiquitin-conjugating enzyme E2 variant 1	Ubiquitin-conjugating enzyme E2 variant 1	encountered in both interactomes
Q99459	116	97	Cell division cycle 5-like protein	Cell division cycle 5-like protein	encountered in both interactomes
P19012	115	52	Keratin, type I cytoskeletal 15	Keratin, type I cytoskeletal 15	encountered in both interactomes
Q15654	115	61	Thyroid receptor-interacting protein 6	Thyroid receptor-interacting protein 6	encountered in both interactomes
Q8ND90	115	27	Paraneoplastic antigen Ma1	Paraneoplastic antigen Ma1	encountered in both interactomes
Q9UJV3	115	16	Probable E3 ubiquitin-protein ligase MID2	Probable E3 ubiquitin-protein ligase MID2	encountered in both interactomes
P20073	114	106	Annexin A7	Annexin A7	encountered in both interactomes
Q14192	114	72	Four and a half LIM domains protein 2	Four and a half LIM domains protein 2	encountered in both interactomes
Q8IZU0	114		Protein FAM9B	Protein FAM9B	encountered only in PICKLE 2.0	common in RHCP
P04406	113	99	Glyceraldehyde-3-phosphate dehydrogenase	Glyceraldehyde-3-phosphate dehydrogenase	encountered in both interactomes
P25490	113	78	Transcriptional repressor protein YY1	Transcriptional repressor protein YY1	encountered in both interactomes
P98170	113	64	E3 ubiquitin-protein ligase XIAP	Baculoviral IAP repeat-containing protein 4	encountered in both interactomes
P19338	112	80	Nucleolin	Nucleolin	encountered in both interactomes
Q05086	112	83	Ubiquitin-protein ligase E3A	Ubiquitin-protein ligase E3A	encountered in both interactomes
Q13619	112	78	Cullin-4A	Cullin-4A	encountered in both interactomes
Q5UIP0	112	106	Telomere-associated protein RIF1	Telomere-associated protein RIF1	encountered in both interactomes
P02751	111	87	Fibronectin	Fibronectin	encountered in both interactomes
P05549	111	29	Transcription factor AP-2-alpha	Transcription factor AP-2-alpha	encountered in both interactomes
P63261	111	88	Actin, cytoplasmic 2	Actin, cytoplasmic 2	encountered in both interactomes
P29350	109	102	Tyrosine-protein phosphatase non-receptor type 6	Tyrosine-protein phosphatase non-receptor type 6	encountered in both interactomes
P49768	109	65	Presenilin-1	Presenilin-1	encountered in both interactomes
P50750	109	71	Cyclin-dependent kinase 9	Cyclin-dependent kinase 9	encountered in both interactomes
Q05513	109	92	Protein kinase C zeta type	Protein kinase C zeta type	encountered in both interactomes
Q9UER7	109	57	Death domain-associated protein 6	Death domain-associated protein 6	encountered in both interactomes
Q9Y6Q9	109	88	Nuclear receptor coactivator 3	Nuclear receptor coactivator 3	encountered in both interactomes
O75925	108	74	E3 SUMO-protein ligase PIAS1	E3 SUMO-protein ligase PIAS1	encountered in both interactomes
Q13309	108	61	S-phase kinase-associated protein 2	S-phase kinase-associated protein 2	encountered in both interactomes
Q8IYB3	108	101	Serine/arginine repetitive matrix protein 1	Serine/arginine repetitive matrix protein 1	encountered in both interactomes
Q9GZQ8	108	42	Microtubule-associated proteins 1A/1B light chain 3B	Microtubule-associated proteins 1A/1B light chain 3B	encountered in both interactomes
Q9Y265	108	91	RuvB-like 1	RuvB-like 1	encountered in both interactomes
Q9Y618	108	98	Nuclear receptor corepressor 2	Nuclear receptor corepressor 2	encountered in both interactomes
P07437	107	70	Tubulin beta chain	Tubulin beta chain	encountered in both interactomes
P49917	107	10	DNA ligase 4	DNA ligase 4	encountered in both interactomes
P12757	106	90	Ski-like protein	Ski-like protein	encountered in both interactomes
Q71DI3	106	53	Histone H3.2	Histone H3.2	encountered in both interactomes
Q92830	106	81	Histone acetyltransferase KAT2A	Histone acetyltransferase KAT2A	encountered in both interactomes
Q9BQ66	106	77	Keratin-associated protein 4-12	Keratin-associated protein 4-12	encountered in both interactomes
Q00534	105	92	Cyclin-dependent kinase 6	Cyclin-dependent kinase 6	encountered in both interactomes
Q05397	105	80	Focal adhesion kinase 1	Focal adhesion kinase 1	encountered in both interactomes
Q14103	105	35	Heterogeneous nuclear ribonucleoprotein D0	Heterogeneous nuclear ribonucleoprotein D0	encountered in both interactomes
Q15910	105	75	Histone-lysine N-methyltransferase EZH2	Histone-lysine N-methyltransferase EZH2	encountered in both interactomes
O43597	104	41	Protein sprouty homolog 2	Protein sprouty homolog 2	encountered in both interactomes
P49407	104	82	Beta-arrestin-1	Beta-arrestin-1	encountered in both interactomes
P61964	104	65	WD repeat-containing protein 5	WD repeat-containing protein 5	encountered in both interactomes
Q7L5N1	104	83	COP9 signalosome complex subunit 6	COP9 signalosome complex subunit 6	encountered in both interactomes
Q9Y230	104	97	RuvB-like 2	RuvB-like 2	encountered in both interactomes
P19784	103	81	Casein kinase II subunit alpha'	Casein kinase II subunit alpha'	encountered in both interactomes
P26371	103	7	Keratin-associated protein 5-9	Keratin-associated protein 5-9	encountered in both interactomes
Q13153	103	83	Serine/threonine-protein kinase PAK 1	Serine/threonine-protein kinase PAK 1	encountered in both interactomes
Q9UBB9	103	10	Tuftelin-interacting protein 11	Tuftelin-interacting protein 11	encountered in both interactomes
Q9Y3C5	103	66	RING finger protein 11	RING finger protein 11	encountered in both interactomes
P11473	102	88	Vitamin D3 receptor	Vitamin D3 receptor	encountered in both interactomes
P16220	102	87	Cyclic AMP-responsive element-binding protein 1	Cyclic AMP-responsive element-binding protein 1	encountered in both interactomes
P25791	102	28	Rhombotin-2	Rhombotin-2	encountered in both interactomes
P26641	102	96	Elongation factor 1-gamma	Elongation factor 1-gamma	encountered in both interactomes
Q00653	102	110	Nuclear factor NF-kappa-B p100 subunit	Nuclear factor NF-kappa-B p100 subunit	encountered in both interactomes
Q04724	102	92	Transducin-like enhancer protein 1	Transducin-like enhancer protein 1 (E(Sp1) homolog)	encountered in both interactomes
Q13114	102	59	TNF receptor-associated factor 3	TNF receptor-associated factor 3	encountered in both interactomes
Q16778	102	60	Histone H2B type 2-E	Histone H2B type 2-E	encountered in both interactomes
Q9NYJ8	102	57	TGF-beta-activated kinase 1 and MAP3K7-binding protein 2	TGF-beta-activated kinase 1 and MAP3K7-binding protein 2	encountered in both interactomes
O14744	101	60	Protein arginine N-methyltransferase 5	Protein arginine N-methyltransferase 5	encountered in both interactomes
P49023	101	79	Paxillin	Paxillin	encountered in both interactomes
P54259	101	99	Atrophin-1	Atrophin-1	encountered in both interactomes
P60484	101	79	Phosphatidylinositol 3,4,5-trisphosphate 3-phosphatase and dual-specificity protein phosphatase PTEN	Phosphatidylinositol-3,4,5-trisphosphate 3-phosphatase and dual-specificity protein phosphatase PTEN	encountered in both interactomes
Q15038	101	62	DAZ-associated protein 2	DAZ-associated protein 2	encountered in both interactomes
Q969Q1	101	57	E3 ubiquitin-protein ligase TRIM63	E3 ubiquitin-protein ligase TRIM63	encountered in both interactomes
P05771	100	75	Protein kinase C beta type	Protein kinase C beta type	encountered in both interactomes
P10636	100	65	Microtubule-associated protein tau	Microtubule-associated protein tau	encountered in both interactomes
P32121	100	86	Beta-arrestin-2	Beta-arrestin-2	encountered in both interactomes
P56537	100	111	Eukaryotic translation initiation factor 6	Eukaryotic translation initiation factor 6	encountered in both interactomes
Q14974	100	86	Importin subunit beta-1	Importin subunit beta-1	encountered in both interactomes
Q6UY14	100	18	ADAMTS-like protein 4	ADAMTS-like protein 4	encountered in both interactomes
P21246	99	95	Pleiotrophin	Pleiotrophin	encountered in both interactomes
P33993	99	72	DNA replication licensing factor MCM7	DNA replication licensing factor MCM7	encountered in both interactomes
P42345	99	57	Serine/threonine-protein kinase mTOR	Serine/threonine-protein kinase mTOR	encountered in both interactomes
P43364	99	63	Melanoma-associated antigen 11	Melanoma-associated antigen 11	encountered in both interactomes
P10721	98	60	Mast/stem cell growth factor receptor Kit	Mast/stem cell growth factor receptor Kit	encountered in both interactomes
P14921	98	71	Protein C-ets-1	Protein C-ets-1	encountered in both interactomes
Q07817	98	87	Bcl-2-like protein 1	Bcl-2-like protein 1	encountered in both interactomes
Q9HC52	98	31	Chromobox protein homolog 8	Chromobox protein homolog 8	encountered in both interactomes
Q9UHD2	98	72	Serine/threonine-protein kinase TBK1	Serine/threonine-protein kinase TBK1	encountered in both interactomes
O43639	97	46	Cytoplasmic protein NCK2	Cytoplasmic protein NCK2	encountered in both interactomes
P27694	97	67	Replication protein A 70 kDa DNA-binding subunit	Replication protein A 70 kDa DNA-binding subunit	encountered in both interactomes
Q13432	97	93	Protein unc-119 homolog A	Protein unc-119 homolog A	encountered in both interactomes
Q969T4	97	50	Ubiquitin-conjugating enzyme E2 E3	Ubiquitin-conjugating enzyme E2 E3	encountered in both interactomes
Q99496	97	57	E3 ubiquitin-protein ligase RING2	E3 ubiquitin-protein ligase RING2	encountered in both interactomes
Q9P2H0	97	96	Uncharacterized protein KIAA1377	Uncharacterized protein KIAA1377	encountered in both interactomes
O00555	96	91	Voltage-dependent P/Q-type calcium channel subunit alpha-1A	Voltage-dependent P/Q-type calcium channel subunit alpha-1A	encountered in both interactomes
P01023	96	51	Alpha-2-macroglobulin	Alpha-2-macroglobulin	encountered in both interactomes
P06213	96	77	Insulin receptor	Insulin receptor	encountered in both interactomes
Q13490	96	55	Baculoviral IAP repeat-containing protein 2	Baculoviral IAP repeat-containing protein 2	encountered in both interactomes
Q15811	96	37	Intersectin-1	Intersectin-1	encountered in both interactomes
Q6EEV6	96	74	Small ubiquitin-related modifier 4	Small ubiquitin-related modifier 4	encountered in both interactomes
Q8N2W9	96	63	E3 SUMO-protein ligase PIAS4	E3 SUMO-protein ligase PIAS4	encountered in both interactomes
Q8WZA2	96	7	Rap guanine nucleotide exchange factor 4	Rap guanine nucleotide exchange factor 4	encountered in both interactomes
Q92731	96	84	Estrogen receptor beta	Estrogen receptor beta	encountered in both interactomes
Q9Y2X8	96	76	Ubiquitin-conjugating enzyme E2 D4	Ubiquitin-conjugating enzyme E2 D4	encountered in both interactomes
Q9Y572	96	91	Receptor-interacting serine/threonine-protein kinase 3	Receptor-interacting serine/threonine-protein kinase 3	encountered in both interactomes
P51116	95	64	Fragile X mental retardation syndrome-related protein 2	Fragile X mental retardation syndrome-related protein 2	encountered in both interactomes
P63167	95	92	Dynein light chain 1, cytoplasmic	Dynein light chain 1, cytoplasmic	encountered in both interactomes
Q9UET6	95	94	Putative tRNA (cytidine(32)/guanosine(34)-2'-O)-methyltransferase	Putative ribosomal RNA methyltransferase 1	encountered in both interactomes
P30153	94	99	Serine/threonine-protein phosphatase 2A 65 kDa regulatory subunit A alpha isoform	Serine/threonine-protein phosphatase 2A 65 kDa regulatory subunit A alpha isoform	encountered in both interactomes
Q13177	94	90	Serine/threonine-protein kinase PAK 2	Serine/threonine-protein kinase PAK 2	encountered in both interactomes
Q13546	94	66	Receptor-interacting serine/threonine-protein kinase 1	Receptor-interacting serine/threonine-protein kinase 1	encountered in both interactomes
Q8N5R6	94	28	Coiled-coil domain-containing protein 33	Coiled-coil domain-containing protein 33	encountered in both interactomes
Q969H0	94	33	F-box/WD repeat-containing protein 7	F-box/WD repeat-containing protein 7	encountered in both interactomes
Q96CV9	94	37	Optineurin	Optineurin	encountered in both interactomes
Q9BSI4	94	10	TERF1-interacting nuclear factor 2	TERF1-interacting nuclear factor 2	encountered in both interactomes
Q9BVG8	94	7	Kinesin-like protein KIFC3	Kinesin-like protein KIFC3	encountered in both interactomes
O15105	93	68	Mothers against decapentaplegic homolog 7	Mothers against decapentaplegic homolog 7	encountered in both interactomes
P09619	93	68	Platelet-derived growth factor receptor beta	Platelet-derived growth factor receptor beta	encountered in both interactomes
P11940	93	61	Polyadenylate-binding protein 1	Polyadenylate-binding protein 1	encountered in both interactomes
P35568	93	77	Insulin receptor substrate 1	Insulin receptor substrate 1	encountered in both interactomes
Q04917	93	96	14-3-3 protein eta	14-3-3 protein eta	encountered in both interactomes
Q9Y2D8	93	9	Afadin- and alpha-actinin-binding protein	Afadin- and alpha-actinin-binding protein	encountered in both interactomes
Q9Y2K1	93	6	Zinc finger and BTB domain-containing protein 1	Zinc finger and BTB domain-containing protein 1	encountered in both interactomes
O14641	92	73	Segment polarity protein dishevelled homolog DVL-2	Segment polarity protein dishevelled homolog DVL-2	encountered in both interactomes
P01112	92	80	GTPase HRas	GTPase HRas	encountered in both interactomes
P12814	92	37	Alpha-actinin-1	Alpha-actinin-1	encountered in both interactomes
Q01105	92	70	Protein SET	Protein SET	encountered in both interactomes
Q13643	92	27	Four and a half LIM domains protein 3	Four and a half LIM domains protein 3	encountered in both interactomes
Q15750	92	76	TGF-beta-activated kinase 1 and MAP3K7-binding protein 1	TGF-beta-activated kinase 1 and MAP3K7-binding protein 1	encountered in both interactomes
P10451	91	20	Osteopontin	Osteopontin	encountered in both interactomes
P12830	91	68	Cadherin-1	Cadherin-1	encountered in both interactomes
P25787	91	35	Proteasome subunit alpha type-2	Proteasome subunit alpha type-2	encountered in both interactomes
Q9H492	91	14	Microtubule-associated proteins 1A/1B light chain 3A	Microtubule-associated proteins 1A/1B light chain 3A	encountered in both interactomes
Q9Y266	91	20	Nuclear migration protein nudC	Nuclear migration protein nudC	encountered in both interactomes
P15498	90	80	Proto-oncogene vav	Proto-oncogene vav	encountered in both interactomes
P24385	90	71	G1/S-specific cyclin-D1	G1/S-specific cyclin-D1	encountered in both interactomes
P50402	90	70	Emerin	Emerin	encountered in both interactomes
Q07021	90	44	Complement component 1 Q subcomponent-binding protein, mitochondrial	Complement component 1 Q subcomponent-binding protein, mitochondrial	encountered in both interactomes
Q969G3	90	55	SWI/SNF-related matrix-associated actin-dependent regulator of chromatin subfamily E member 1	SWI/SNF-related matrix-associated actin-dependent regulator of chromatin subfamily E member 1	encountered in both interactomes
Q96LA8	90	6	Protein arginine N-methyltransferase 6	Protein arginine N-methyltransferase 6	encountered in both interactomes
P04156	89	82	Major prion protein	Major prion protein	encountered in both interactomes
P15923	89	71	Transcription factor E2-alpha	Transcription factor E2-alpha	encountered in both interactomes
P48023	89	82	Tumor necrosis factor ligand superfamily member 6	Tumor necrosis factor ligand superfamily member 6	encountered in both interactomes
Q13573	89	64	SNW domain-containing protein 1	SNW domain-containing protein 1	encountered in both interactomes
Q96KQ7	89	63	Histone-lysine N-methyltransferase EHMT2	Histone-lysine N-methyltransferase EHMT2	encountered in both interactomes
Q9BUZ4	89	30	TNF receptor-associated factor 4	TNF receptor-associated factor 4	encountered in both interactomes
Q9UM11	89	26	Fizzy-related protein homolog	Fizzy-related protein homolog	encountered in both interactomes
P28749	88	66	Retinoblastoma-like protein 1	Retinoblastoma-like protein 1	encountered in both interactomes
P49639	88	14	Homeobox protein Hox-A1	Homeobox protein Hox-A1	encountered in both interactomes
P62195	88	49	26S protease regulatory subunit 8	26S protease regulatory subunit 8	encountered in both interactomes
Q12800	88	40	Alpha-globin transcription factor CP2	Alpha-globin transcription factor CP2	encountered in both interactomes
Q12824	88	85	SWI/SNF-related matrix-associated actin-dependent regulator of chromatin subfamily B member 1	SWI/SNF-related matrix-associated actin-dependent regulator of chromatin subfamily B member 1	encountered in both interactomes
Q12959	88	82	Disks large homolog 1	Disks large homolog 1	encountered in both interactomes
P10827	87	69	Thyroid hormone receptor alpha	Thyroid hormone receptor alpha	encountered in both interactomes
P20936	87	82	Ras GTPase-activating protein 1	Ras GTPase-activating protein 1	encountered in both interactomes
P84243	87	73	Histone H3.3	Histone H3.3	encountered in both interactomes
Q13131	87	37	5'-AMP-activated protein kinase catalytic subunit alpha-1	5'-AMP-activated protein kinase catalytic subunit alpha-1	encountered in both interactomes
Q15648	87	81	Mediator of RNA polymerase II transcription subunit 1	Mediator of RNA polymerase II transcription subunit 1	encountered in both interactomes
Q96HA8	87	20	Protein N-terminal glutamine amidohydrolase	Protein N-terminal glutamine amidohydrolase	encountered in both interactomes
O75604	86	16	Ubiquitin carboxyl-terminal hydrolase 2	Ubiquitin carboxyl-terminal hydrolase 2	encountered in both interactomes
P05783	86	59	Keratin, type I cytoskeletal 18	Keratin, type I cytoskeletal 18	encountered in both interactomes
P08631	86	71	Tyrosine-protein kinase HCK	Tyrosine-protein kinase HCK	encountered in both interactomes
P68036	86	47	Ubiquitin-conjugating enzyme E2 L3	Ubiquitin-conjugating enzyme E2 L3	encountered in both interactomes
Q00839	86	61	Heterogeneous nuclear ribonucleoprotein U	Heterogeneous nuclear ribonucleoprotein U	encountered in both interactomes
Q13422	86	34	DNA-binding protein Ikaros	DNA-binding protein Ikaros	encountered in both interactomes
Q8IVD9	86	1	NudC domain-containing protein 3	NudC domain-containing protein 3	encountered in both interactomes
Q8TCJ0	86	2	F-box only protein 25	F-box only protein 25	encountered in both interactomes
Q8WZ42	86	28	Titin	Titin	encountered in both interactomes
Q9UBU8	86	49	Mortality factor 4-like protein 1	Mortality factor 4-like protein 1	encountered in both interactomes
P23458	85	79	Tyrosine-protein kinase JAK1	Tyrosine-protein kinase JAK1	encountered in both interactomes
P42229	85	63	Signal transducer and activator of transcription 5A	Signal transducer and activator of transcription 5A	encountered in both interactomes
P56545	85	41	C-terminal-binding protein 2	C-terminal-binding protein 2	encountered in both interactomes
Q13885	85	69	Tubulin beta-2A chain	Tubulin beta-2A chain	encountered in both interactomes
Q14289	85	76	Protein-tyrosine kinase 2-beta	Protein-tyrosine kinase 2-beta	encountered in both interactomes
Q16777	85	55	Histone H2A type 2-C	Histone H2A type 2-C	encountered in both interactomes
Q99683	85	61	Mitogen-activated protein kinase kinase kinase 5	Mitogen-activated protein kinase kinase kinase 5	encountered in both interactomes
Q9H040	85	1	SprT-like domain-containing protein Spartan	Zinc finger RAD18 domain-containing protein C1orf124	encountered in both interactomes
Q9UKT9	85	26	Zinc finger protein Aiolos	Zinc finger protein Aiolos	encountered in both interactomes
O75928	84	50	E3 SUMO-protein ligase PIAS2	E3 SUMO-protein ligase PIAS2	encountered in both interactomes
P14635	84	60	G2/mitotic-specific cyclin-B1	G2/mitotic-specific cyclin-B1	encountered in both interactomes
P24522	84	64	Growth arrest and DNA damage-inducible protein GADD45 alpha	Growth arrest and DNA damage-inducible protein GADD45 alpha	encountered in both interactomes
Q00535	84	61	Cyclin-dependent-like kinase 5	Cyclin-dependent kinase 5	encountered in both interactomes
Q9BQB6	84	1	Vitamin K epoxide reductase complex subunit 1	Vitamin K epoxide reductase complex subunit 1	encountered in both interactomes
Q9HAU5	84	35	Regulator of nonsense transcripts 2	Regulator of nonsense transcripts 2	encountered in both interactomes
O15350	83	56	Tumor protein p73	Tumor protein p73	encountered in both interactomes
P09429	83	75	High mobility group protein B1	High mobility group protein B1	encountered in both interactomes
P15172	83	72	Myoblast determination protein 1	Myoblast determination protein 1	encountered in both interactomes
P17844	83	54	Probable ATP-dependent RNA helicase DDX5	Probable ATP-dependent RNA helicase DDX5	encountered in both interactomes
P49715	83	58	CCAAT/enhancer-binding protein alpha	CCAAT/enhancer-binding protein alpha	encountered in both interactomes
P51531	83	73	Probable global transcription activator SNF2L2	Probable global transcription activator SNF2L2	encountered in both interactomes
P61244	83	76	Protein max	Protein max	encountered in both interactomes
Q08211	83	68	ATP-dependent RNA helicase A	ATP-dependent RNA helicase A	encountered in both interactomes
Q15645	83	56	Pachytene checkpoint protein 2 homolog	Pachytene checkpoint protein 2 homolog	encountered in both interactomes
Q15788	83	73	Nuclear receptor coactivator 1	Nuclear receptor coactivator 1	encountered in both interactomes
Q16594	83	74	Transcription initiation factor TFIID subunit 9	Transcription initiation factor TFIID subunit 9	encountered in both interactomes
Q92624	83	26	Amyloid protein-binding protein 2	Amyloid protein-binding protein 2	encountered in both interactomes
Q96GD4	83	37	Aurora kinase B	Aurora kinase B	encountered in both interactomes
O00141	82	68	Serine/threonine-protein kinase Sgk1	Serine/threonine-protein kinase Sgk1	encountered in both interactomes
P11387	82	65	DNA topoisomerase 1	DNA topoisomerase 1	encountered in both interactomes
P15311	82	77	Ezrin	Ezrin	encountered in both interactomes
P45984	82	55	Mitogen-activated protein kinase 9	Mitogen-activated protein kinase 9	encountered in both interactomes
Q13424	82	26	Alpha-1-syntrophin	Alpha-1-syntrophin	encountered in both interactomes
Q13535	82	70	Serine/threonine-protein kinase ATR	Serine/threonine-protein kinase ATR	encountered in both interactomes
Q16576	82	66	Histone-binding protein RBBP7	Histone-binding protein RBBP7	encountered in both interactomes
O15265	81	73	Ataxin-7	Ataxin-7	encountered in both interactomes
O75553	81	26	Disabled homolog 1	Disabled homolog 1	encountered in both interactomes
P27824	81	56	Calnexin	Calnexin	encountered in both interactomes
P38432	81	60	Coilin	Coilin	encountered in both interactomes
P46109	81	58	Crk-like protein	Crk-like protein	encountered in both interactomes
P60900	81	35	Proteasome subunit alpha type-6	Proteasome subunit alpha type-6	encountered in both interactomes
Q14498	81	39	RNA-binding protein 39	RNA-binding protein 39	encountered in both interactomes
Q15369	81	50	Transcription elongation factor B polypeptide 1	Transcription elongation factor B polypeptide 1	encountered in both interactomes
Q92754	81	5	Transcription factor AP-2 gamma	Transcription factor AP-2 gamma	encountered in both interactomes
O00567	80	79	Nucleolar protein 56	Nucleolar protein 56	encountered in both interactomes
P01241	80	83	Somatotropin	Somatotropin	encountered in both interactomes
P29692	80	69	Elongation factor 1-delta	Elongation factor 1-delta	encountered in both interactomes
P50570	80	62	Dynamin-2	Dynamin-2	encountered in both interactomes
P62826	80	61	GTP-binding nuclear protein Ran	GTP-binding nuclear protein Ran	encountered in both interactomes
P62873	80	30	Guanine nucleotide-binding protein G(I)/G(S)/G(T) subunit beta-1	Guanine nucleotide-binding protein G(I)/G(S)/G(T) subunit beta-1	encountered in both interactomes
Q07954	80	63	Prolow-density lipoprotein receptor-related protein 1	Prolow-density lipoprotein receptor-related protein 1	encountered in both interactomes
Q14194	80	72	Dihydropyrimidinase-related protein 1	Dihydropyrimidinase-related protein 1	encountered in both interactomes
Q14686	80	75	Nuclear receptor coactivator 6	Nuclear receptor coactivator 6	encountered in both interactomes
Q9NZM3	80	16	Intersectin-2	Intersectin-2	encountered in both interactomes
P17676	79	73	CCAAT/enhancer-binding protein beta	CCAAT/enhancer-binding protein beta	encountered in both interactomes
P35232	79	54	Prohibitin	Prohibitin	encountered in both interactomes
P42768	79	59	Wiskott-Aldrich syndrome protein	Wiskott-Aldrich syndrome protein	encountered in both interactomes
P46527	79	56	Cyclin-dependent kinase inhibitor 1B	Cyclin-dependent kinase inhibitor 1B	encountered in both interactomes
P61086	79	56	Ubiquitin-conjugating enzyme E2 K	Ubiquitin-conjugating enzyme E2 K	encountered in both interactomes
P61457	79	75	Pterin-4-alpha-carbinolamine dehydratase	Pterin-4-alpha-carbinolamine dehydratase	encountered in both interactomes
Q12834	79	53	Cell division cycle protein 20 homolog	Cell division cycle protein 20 homolog	encountered in both interactomes
Q13480	79	33	GRB2-associated-binding protein 1	GRB2-associated-binding protein 1	encountered in both interactomes
Q96BK5	79	95	PIN2/TERF1-interacting telomerase inhibitor 1	PIN2/TERF1-interacting telomerase inhibitor 1	encountered in both interactomes
O00213	78	69	Amyloid beta A4 precursor protein-binding family B member 1	Amyloid beta A4 precursor protein-binding family B member 1	encountered in both interactomes
O15169	78	55	Axin-1	Axin-1	encountered in both interactomes
O95166	78	23	Gamma-aminobutyric acid receptor-associated protein	Gamma-aminobutyric acid receptor-associated protein (GABA(A) receptor-associated protein)	encountered in both interactomes
P11831	78	69	Serum response factor	Serum response factor	encountered in both interactomes
P21673	78	63	Diamine acetyltransferase 1	Diamine acetyltransferase 1	encountered in both interactomes
P26358	78	56	DNA (cytosine-5)-methyltransferase 1	DNA (cytosine-5)-methyltransferase 1	encountered in both interactomes
Q8N9N5	78	11	Protein BANP	Protein BANP	encountered in both interactomes
Q9H0R8	78	8	Gamma-aminobutyric acid receptor-associated protein-like 1	Gamma-aminobutyric acid receptor-associated protein-like 1	encountered in both interactomes
O14503	77	15	Class E basic helix-loop-helix protein 40	Class E basic helix-loop-helix protein 40	encountered in both interactomes
O14965	77	48	Aurora kinase A	Aurora kinase A	encountered in both interactomes
O43353	77	69	Receptor-interacting serine/threonine-protein kinase 2	Receptor-interacting serine/threonine-protein kinase 2	encountered in both interactomes
P15927	77	56	Replication protein A 32 kDa subunit	Replication protein A 32 kDa subunit	encountered in both interactomes
P30260	77	35	Cell division cycle protein 27 homolog	Cell division cycle protein 27 homolog	encountered in both interactomes
Q13330	77	44	Metastasis-associated protein MTA1	Metastasis-associated protein MTA1	encountered in both interactomes
Q6VMQ6	77	74	Activating transcription factor 7-interacting protein 1	Activating transcription factor 7-interacting protein 1	encountered in both interactomes
Q92956	77	77	Tumor necrosis factor receptor superfamily member 14	Tumor necrosis factor receptor superfamily member 14	encountered in both interactomes
Q96LR5	77	38	Ubiquitin-conjugating enzyme E2 E2	Ubiquitin-conjugating enzyme E2 E2	encountered in both interactomes
Q96S59	77	44	Ran-binding protein 9	Ran-binding protein 9	encountered in both interactomes
Q9HB71	77	28	Calcyclin-binding protein	Calcyclin-binding protein	encountered in both interactomes
O95295	76	33	SNARE-associated protein Snapin	SNARE-associated protein Snapin	encountered in both interactomes
O95425	76	62	Supervillin	Supervillin	encountered in both interactomes
P04899	76	55	Guanine nucleotide-binding protein G(i) subunit alpha-2	Guanine nucleotide-binding protein G(i) subunit alpha-2	encountered in both interactomes
P49736	76	59	DNA replication licensing factor MCM2	DNA replication licensing factor MCM2	encountered in both interactomes
P51617	76	57	Interleukin-1 receptor-associated kinase 1	Interleukin-1 receptor-associated kinase 1	encountered in both interactomes
Q07912	76	37	Activated CDC42 kinase 1	Activated CDC42 kinase 1	encountered in both interactomes
Q15287	76	109	RNA-binding protein with serine-rich domain 1	RNA-binding protein with serine-rich domain 1	encountered in both interactomes
Q5VTD9	76	77	Zinc finger protein Gfi-1b	Zinc finger protein Gfi-1b	encountered in both interactomes
Q96PM5	76	23	RING finger and CHY zinc finger domain-containing protein 1	RING finger and CHY zinc finger domain-containing protein 1	encountered in both interactomes
Q9UBU9	76	27	Nuclear RNA export factor 1	Nuclear RNA export factor 1	encountered in both interactomes
O95273	75	18	Cyclin-D1-binding protein 1	Cyclin-D1-binding protein 1	encountered in both interactomes
P02545	75	56	Prelamin-A/C	Prelamin-A/C [Cleaved into: Lamin-A/C	encountered in both interactomes
P02686	75	46	Myelin basic protein	Myelin basic protein	encountered in both interactomes
P16455	75		Methylated-DNA--protein-cysteine methyltransferase	Methylated-DNA--protein-cysteine methyltransferase	encountered only in PICKLE 2.0	common in RHCP
P21860	75	68	Receptor tyrosine-protein kinase erbB-3	Receptor tyrosine-protein kinase erbB-3	encountered in both interactomes
P35609	75	49	Alpha-actinin-2	Alpha-actinin-2	encountered in both interactomes
P78396	75	65	Cyclin-A1	Cyclin-A1	encountered in both interactomes
Q06187	75	66	Tyrosine-protein kinase BTK	Tyrosine-protein kinase BTK	encountered in both interactomes
Q13617	75	49	Cullin-2	Cullin-2	encountered in both interactomes
Q15596	75	68	Nuclear receptor coactivator 2	Nuclear receptor coactivator 2	encountered in both interactomes
Q15628	75	61	Tumor necrosis factor receptor type 1-associated DEATH domain protein	Tumor necrosis factor receptor type 1-associated DEATH domain protein	encountered in both interactomes
Q16891	75	61	MICOS complex subunit MIC60	Mitochondrial inner membrane protein	encountered in both interactomes
Q96B02	75	62	Ubiquitin-conjugating enzyme E2 W	Ubiquitin-conjugating enzyme E2 W	encountered in both interactomes
Q9H8Y8	75	30	Golgi reassembly-stacking protein 2	Golgi reassembly-stacking protein 2	encountered in both interactomes
Q9Y5J5	75	95	Pleckstrin homology-like domain family A member 3	Pleckstrin homology-like domain family A member 3	encountered in both interactomes
E9PB15	74		Putative protein PTGES3L	-	encountered only in PICKLE 2.0	newly added in RHCP; Category 2
O14543	74	37	Suppressor of cytokine signaling 3	Suppressor of cytokine signaling 3	encountered in both interactomes
O15360	74	66	Fanconi anemia group A protein	Fanconi anemia group A protein	encountered in both interactomes
O15530	74	59	3-phosphoinositide-dependent protein kinase 1	3-phosphoinositide-dependent protein kinase 1	encountered in both interactomes
P08575	74	50	Receptor-type tyrosine-protein phosphatase C	Receptor-type tyrosine-protein phosphatase C	encountered in both interactomes
P23246	74	59	Splicing factor, proline- and glutamine-rich	Splicing factor, proline- and glutamine-rich	encountered in both interactomes
P25445	74	50	Tumor necrosis factor receptor superfamily member 6	Tumor necrosis factor receptor superfamily member 6	encountered in both interactomes
P41235	74	63	Hepatocyte nuclear factor 4-alpha	Hepatocyte nuclear factor 4-alpha	encountered in both interactomes
P61201	74	36	COP9 signalosome complex subunit 2	COP9 signalosome complex subunit 2	encountered in both interactomes
Q8IXK0	74	29	Polyhomeotic-like protein 2	Polyhomeotic-like protein 2	encountered in both interactomes
Q9BTE6	74		Alanyl-tRNA editing protein Aarsd1	Alanyl-tRNA editing protein Aarsd1	encountered only in PICKLE 2.0	common in RHCP
Q9H1Y0	74	58	Autophagy protein 5	Autophagy protein 5	encountered in both interactomes
Q9H4A3	74	61	Serine/threonine-protein kinase WNK1	Serine/threonine-protein kinase WNK1	encountered in both interactomes
O00308	73	40	NEDD4-like E3 ubiquitin-protein ligase WWP2	NEDD4-like E3 ubiquitin-protein ligase WWP2	encountered in both interactomes
P06401	73	56	Progesterone receptor	Progesterone receptor	encountered in both interactomes
P08069	73	59	Insulin-like growth factor 1 receptor	Insulin-like growth factor 1 receptor	encountered in both interactomes
P10242	73	63	Transcriptional activator Myb	Transcriptional activator Myb	encountered in both interactomes
P10809	73	47	60 kDa heat shock protein, mitochondrial	60 kDa heat shock protein, mitochondrial	encountered in both interactomes
P11274	73	66	Breakpoint cluster region protein	Breakpoint cluster region protein	encountered in both interactomes
P15336	73	49	Cyclic AMP-dependent transcription factor ATF-2	Cyclic AMP-dependent transcription factor ATF-2	encountered in both interactomes
P20648	73		Potassium-transporting ATPase alpha chain 1	Potassium-transporting ATPase alpha chain 1	encountered only in PICKLE 2.0	common in RHCP
P37198	73	36	Nuclear pore glycoprotein p62	Nuclear pore glycoprotein p62	encountered in both interactomes
P50542	73	12	Peroxisomal targeting signal 1 receptor	Peroxisomal targeting signal 1 receptor	encountered in both interactomes
P60331	73		Keratin-associated protein 10-1	Keratin-associated protein 10-1	encountered only in PICKLE 2.0	common in RHCP
Q02156	73	56	Protein kinase C epsilon type	Protein kinase C epsilon type	encountered in both interactomes
Q04771	73	66	Activin receptor type-1	Activin receptor type-1	encountered in both interactomes
Q06609	73	63	DNA repair protein RAD51 homolog 1	DNA repair protein RAD51 homolog 1	encountered in both interactomes
Q15025	73	19	TNFAIP3-interacting protein 1	TNFAIP3-interacting protein 1	encountered in both interactomes
Q8IZP0	73	61	Abl interactor 1	Abl interactor 1	encountered in both interactomes
Q92922	73	65	SWI/SNF complex subunit SMARCC1	SWI/SNF complex subunit SMARCC1	encountered in both interactomes
Q96GM5	73	38	SWI/SNF-related matrix-associated actin-dependent regulator of chromatin subfamily D member 1	SWI/SNF-related matrix-associated actin-dependent regulator of chromatin subfamily D member 1	encountered in both interactomes
Q9GZM8	73	38	Nuclear distribution protein nudE-like 1	Nuclear distribution protein nudE-like 1	encountered in both interactomes
O43809	72	67	Cleavage and polyadenylation specificity factor subunit 5	Cleavage and polyadenylation specificity factor subunit 5	encountered in both interactomes
P02511	72	20	Alpha-crystallin B chain	Alpha-crystallin B chain (Alpha(B)-crystallin)	encountered in both interactomes
P05556	72	56	Integrin beta-1	Integrin beta-1	encountered in both interactomes
P07910	72	42	Heterogeneous nuclear ribonucleoproteins C1/C2	Heterogeneous nuclear ribonucleoproteins C1/C2	encountered in both interactomes
P10644	72	62	cAMP-dependent protein kinase type I-alpha regulatory subunit	cAMP-dependent protein kinase type I-alpha regulatory subunit	encountered in both interactomes
P18848	72	41	Cyclic AMP-dependent transcription factor ATF-4	Cyclic AMP-dependent transcription factor ATF-4	encountered in both interactomes
P20248	72	47	Cyclin-A2	Cyclin-A2	encountered in both interactomes
P26368	72	39	Splicing factor U2AF 65 kDa subunit	Splicing factor U2AF 65 kDa subunit	encountered in both interactomes
P29372	72	38	DNA-3-methyladenine glycosylase	DNA-3-methyladenine glycosylase	encountered in both interactomes
P46531	72	57	Neurogenic locus notch homolog protein 1	Neurogenic locus notch homolog protein 1	encountered in both interactomes
P49450	72	61	Histone H3-like centromeric protein A	Histone H3-like centromeric protein A	encountered in both interactomes
P55210	72	54	Caspase-7	Caspase-7	encountered in both interactomes
Q01196	72	63	Runt-related transcription factor 1	Runt-related transcription factor 1	encountered in both interactomes
Q01201	72	70	Transcription factor RelB	Transcription factor RelB	encountered in both interactomes
Q13111	72	55	Chromatin assembly factor 1 subunit A	Chromatin assembly factor 1 subunit A	encountered in both interactomes
Q13625	72	35	Apoptosis-stimulating of p53 protein 2	Apoptosis-stimulating of p53 protein 2	encountered in both interactomes
Q14145	72	27	Kelch-like ECH-associated protein 1	Kelch-like ECH-associated protein 1	encountered in both interactomes
Q6RW13	72	13	Type-1 angiotensin II receptor-associated protein	Type-1 angiotensin II receptor-associated protein	encountered in both interactomes
O00238	71	66	Bone morphogenetic protein receptor type-1B	Bone morphogenetic protein receptor type-1B	encountered in both interactomes
O14746	71	33	Telomerase reverse transcriptase	Telomerase reverse transcriptase	encountered in both interactomes
O43741	71	10	5'-AMP-activated protein kinase subunit beta-2	5'-AMP-activated protein kinase subunit beta-2	encountered in both interactomes
P10828	71	61	Thyroid hormone receptor beta	Thyroid hormone receptor beta	encountered in both interactomes
P17096	71	35	High mobility group protein HMG-I/HMG-Y	High mobility group protein HMG-I/HMG-Y (HMG-I(Y))	encountered in both interactomes
P24864	71	41	G1/S-specific cyclin-E1	G1/S-specific cyclin-E1	encountered in both interactomes
P60896	71	4	26S proteasome complex subunit DSS1	26S proteasome complex subunit DSS1	encountered in both interactomes
Q03164	71	59	Histone-lysine N-methyltransferase 2A	Histone-lysine N-methyltransferase MLL	encountered in both interactomes
Q14203	71	59	Dynactin subunit 1	Dynactin subunit 1	encountered in both interactomes
Q14839	71	46	Chromodomain-helicase-DNA-binding protein 4	Chromodomain-helicase-DNA-binding protein 4	encountered in both interactomes
Q15233	71	42	Non-POU domain-containing octamer-binding protein	Non-POU domain-containing octamer-binding protein	encountered in both interactomes
Q8IYX8	71	5	Centrosomal protein CEP57L1	Centrosomal protein CEP57L1	encountered in both interactomes
Q9BYM8	71	23	RanBP-type and C3HC4-type zinc finger-containing protein 1	RanBP-type and C3HC4-type zinc finger-containing protein 1	encountered in both interactomes
Q9UKV5	71	45	E3 ubiquitin-protein ligase AMFR	E3 ubiquitin-protein ligase AMFR	encountered in both interactomes
P10909	70	30	Clusterin	Clusterin	encountered in both interactomes
P22392	70	65	Nucleoside diphosphate kinase B	Nucleoside diphosphate kinase B	encountered in both interactomes
P31948	70	23	Stress-induced-phosphoprotein 1	Stress-induced-phosphoprotein 1	encountered in both interactomes
P35637	70	37	RNA-binding protein FUS	RNA-binding protein FUS	encountered in both interactomes
P35638	70	24	DNA damage-inducible transcript 3 protein	DNA damage-inducible transcript 3 protein	encountered in both interactomes
P38646	70	53	Stress-70 protein, mitochondrial	Stress-70 protein, mitochondrial	encountered in both interactomes
P52735	70	19	Guanine nucleotide exchange factor VAV2	Guanine nucleotide exchange factor VAV2	encountered in both interactomes
Q13158	70	56	FAS-associated death domain protein	Protein FADD	encountered in both interactomes
Q13813	70	63	Spectrin alpha chain, non-erythrocytic 1	Spectrin alpha chain, brain	encountered in both interactomes
Q92900	70	47	Regulator of nonsense transcripts 1	Regulator of nonsense transcripts 1	encountered in both interactomes
Q9GZT8	70	43	Putative GTP cyclohydrolase 1 type 2 NIF3L1	NIF3-like protein 1	encountered in both interactomes
Q9H204	70	67	Mediator of RNA polymerase II transcription subunit 28	Mediator of RNA polymerase II transcription subunit 28	encountered in both interactomes
Q9Y2Q3	70	93	Glutathione S-transferase kappa 1	Glutathione S-transferase kappa 1	encountered in both interactomes
Q9Y5V3	70	58	Melanoma-associated antigen D1	Melanoma-associated antigen D1	encountered in both interactomes
O95835	69	15	Serine/threonine-protein kinase LATS1	Serine/threonine-protein kinase LATS1	encountered in both interactomes
P09651	69	33	Heterogeneous nuclear ribonucleoprotein A1	Heterogeneous nuclear ribonucleoprotein A1	encountered in both interactomes
P11308	69	18	Transcriptional regulator ERG	Transcriptional regulator ERG	encountered in both interactomes
P21980	69	42	Protein-glutamine gamma-glutamyltransferase 2	Protein-glutamine gamma-glutamyltransferase 2	encountered in both interactomes
P43403	69	57	Tyrosine-protein kinase ZAP-70	Tyrosine-protein kinase ZAP-70	encountered in both interactomes
P46940	69	38	Ras GTPase-activating-like protein IQGAP1	Ras GTPase-activating-like protein IQGAP1	encountered in both interactomes
P48431	69	8	Transcription factor SOX-2	Transcription factor SOX-2	encountered in both interactomes
P49336	69	49	Cyclin-dependent kinase 8	Cyclin-dependent kinase 8	encountered in both interactomes
Q07889	69	62	Son of sevenless homolog 1	Son of sevenless homolog 1	encountered in both interactomes
Q13418	69	84	Integrin-linked protein kinase	Integrin-linked protein kinase	encountered in both interactomes
Q8N6L0	69	1	Protein KASH5	Coiled-coil domain-containing protein 155	encountered in both interactomes
Q8WUM4	69	44	Programmed cell death 6-interacting protein	Programmed cell death 6-interacting protein	encountered in both interactomes
Q93034	69	39	Cullin-5	Cullin-5	encountered in both interactomes
Q9BYR5	69		Keratin-associated protein 4-2	Keratin-associated protein 4-2	encountered only in PICKLE 2.0	common in RHCP
Q9H0M0	69	42	NEDD4-like E3 ubiquitin-protein ligase WWP1	NEDD4-like E3 ubiquitin-protein ligase WWP1	encountered in both interactomes
Q9Y4E8	69	14	Ubiquitin carboxyl-terminal hydrolase 15	Ubiquitin carboxyl-terminal hydrolase 15	encountered in both interactomes
O14757	68	49	Serine/threonine-protein kinase Chk1	Serine/threonine-protein kinase Chk1	encountered in both interactomes
P01375	68	54	Tumor necrosis factor	Tumor necrosis factor	encountered in both interactomes
P13569	68	45	Cystic fibrosis transmembrane conductance regulator	Cystic fibrosis transmembrane conductance regulator	encountered in both interactomes
P23443	68	51	Ribosomal protein S6 kinase beta-1	Ribosomal protein S6 kinase beta-1	encountered in both interactomes
P54257	68	58	Huntingtin-associated protein 1	Huntingtin-associated protein 1	encountered in both interactomes
P62256	68	45	Ubiquitin-conjugating enzyme E2 H	Ubiquitin-conjugating enzyme E2 H	encountered in both interactomes
P63096	68	57	Guanine nucleotide-binding protein G(i) subunit alpha-1	Guanine nucleotide-binding protein G(i) subunit alpha-1	encountered in both interactomes
Q00403	68	58	Transcription initiation factor IIB	Transcription initiation factor IIB	encountered in both interactomes
Q00613	68	55	Heat shock factor protein 1	Heat shock factor protein 1	encountered in both interactomes
Q13895	68	10	Bystin	Bystin	encountered in both interactomes
Q16236	68	38	Nuclear factor erythroid 2-related factor 2	Nuclear factor erythroid 2-related factor 2	encountered in both interactomes
Q5VU43	68	19	Myomegalin	Myomegalin	encountered in both interactomes
Q8N122	68	18	Regulatory-associated protein of mTOR	Regulatory-associated protein of mTOR	encountered in both interactomes
Q8TAQ2	68	56	SWI/SNF complex subunit SMARCC2	SWI/SNF complex subunit SMARCC2	encountered in both interactomes
Q96CS2	68	10	HAUS augmin-like complex subunit 1	HAUS augmin-like complex subunit 1	encountered in both interactomes
O75365	67	106	Protein tyrosine phosphatase type IVA 3	Protein tyrosine phosphatase type IVA 3	encountered in both interactomes
O96017	67	42	Serine/threonine-protein kinase Chk2	Serine/threonine-protein kinase Chk2	encountered in both interactomes
P07947	67	43	Tyrosine-protein kinase Yes	Tyrosine-protein kinase Yes	encountered in both interactomes
P19387	67	55	DNA-directed RNA polymerase II subunit RPB3	DNA-directed RNA polymerase II subunit RPB3	encountered in both interactomes
P20339	67	43	Ras-related protein Rab-5A	Ras-related protein Rab-5A	encountered in both interactomes
P41240	67	54	Tyrosine-protein kinase CSK	Tyrosine-protein kinase CSK	encountered in both interactomes
P49810	67	40	Presenilin-2	Presenilin-2	encountered in both interactomes
P51610	67	58	Host cell factor 1	Host cell factor 1	encountered in both interactomes
P56945	67	60	Breast cancer anti-estrogen resistance protein 1	Breast cancer anti-estrogen resistance protein 1	encountered in both interactomes
P98082	67	36	Disabled homolog 2	Disabled homolog 2	encountered in both interactomes
Q13489	67	32	Baculoviral IAP repeat-containing protein 3	Baculoviral IAP repeat-containing protein 3	encountered in both interactomes
Q15014	67	47	Mortality factor 4-like protein 2	Mortality factor 4-like protein 2	encountered in both interactomes
Q5VVX9	67	66	Ubiquitin-conjugating enzyme E2 U	Ubiquitin-conjugating enzyme E2 U	encountered in both interactomes
Q8TAU3	67	13	Zinc finger protein 417	Zinc finger protein 417	encountered in both interactomes
Q96AP0	67	8	Adrenocortical dysplasia protein homolog	Adrenocortical dysplasia protein homolog	encountered in both interactomes
Q96FW1	67	39	Ubiquitin thioesterase OTUB1	Ubiquitin thioesterase OTUB1	encountered in both interactomes
Q9BYV6	67	10	Tripartite motif-containing protein 55	Tripartite motif-containing protein 55	encountered in both interactomes
Q9H257	67	4	Caspase recruitment domain-containing protein 9	Caspase recruitment domain-containing protein 9	encountered in both interactomes
Q9H3D4	67	31	Tumor protein 63	Tumor protein 63	encountered in both interactomes
Q9NYB9	67	23	Abl interactor 2	Abl interactor 2	encountered in both interactomes
O14936	66	44	Peripheral plasma membrane protein CASK	Peripheral plasma membrane protein CASK	encountered in both interactomes
O60934	66	43	Nibrin	Nibrin	encountered in both interactomes
P13805	66	55	Troponin T, slow skeletal muscle	Troponin T, slow skeletal muscle	encountered in both interactomes
P21675	66	49	Transcription initiation factor TFIID subunit 1	Transcription initiation factor TFIID subunit 1	encountered in both interactomes
P37173	66	45	TGF-beta receptor type-2	TGF-beta receptor type-2	encountered in both interactomes
Q07955	66	46	Serine/arginine-rich splicing factor 1	Serine/arginine-rich splicing factor 1	encountered in both interactomes
Q13191	66	35	E3 ubiquitin-protein ligase CBL-B	E3 ubiquitin-protein ligase CBL-B	encountered in both interactomes
Q13620	66	45	Cullin-4B	Cullin-4B	encountered in both interactomes
Q14676	66	36	Mediator of DNA damage checkpoint protein 1	Mediator of DNA damage checkpoint protein 1	encountered in both interactomes
Q15653	66	75	NF-kappa-B inhibitor beta	NF-kappa-B inhibitor beta	encountered in both interactomes
Q38SD2	66	5	Leucine-rich repeat serine/threonine-protein kinase 1	Leucine-rich repeat serine/threonine-protein kinase 1	encountered in both interactomes
Q3B820	66	2	Protein FAM161A	Protein FAM161A	encountered in both interactomes
Q6P1W5	66	10	Uncharacterized protein C1orf94	Uncharacterized protein C1orf94	encountered in both interactomes
Q9UBL3	66	47	Set1/Ash2 histone methyltransferase complex subunit ASH2	Set1/Ash2 histone methyltransferase complex subunit ASH2	encountered in both interactomes
Q9UGN5	66	64	Poly "ADP-ribose" polymerase 2	Poly [ADP-ribose] polymerase 2	encountered in both interactomes
Q9Y3C7	66	66	Mediator of RNA polymerase II transcription subunit 31	Mediator of RNA polymerase II transcription subunit 31	encountered in both interactomes
O00459	65	38	Phosphatidylinositol 3-kinase regulatory subunit beta	Phosphatidylinositol 3-kinase regulatory subunit beta	encountered in both interactomes
O14818	65	38	Proteasome subunit alpha type-7	Proteasome subunit alpha type-7	encountered in both interactomes
O75582	65	49	Ribosomal protein S6 kinase alpha-5	Ribosomal protein S6 kinase alpha-5	encountered in both interactomes
O94776	65	44	Metastasis-associated protein MTA2	Metastasis-associated protein MTA2	encountered in both interactomes
O95751	65	35	Protein LDOC1	Protein LDOC1	encountered in both interactomes
P0C7T5	65	5	Ataxin-1-like	Ataxin-1-like	encountered in both interactomes
P58340	65	6	Myeloid leukemia factor 1	Myeloid leukemia factor 1	encountered in both interactomes
P68366	65	63	Tubulin alpha-4A chain	Tubulin alpha-4A chain	encountered in both interactomes
Q12888	65	43	Tumor suppressor p53-binding protein 1	Tumor suppressor p53-binding protein 1	encountered in both interactomes
Q15303	65	49	Receptor tyrosine-protein kinase erbB-4	Receptor tyrosine-protein kinase erbB-4	encountered in both interactomes
Q15365	65	45	Poly(rC)-binding protein 1	Poly(rC)-binding protein 1	encountered in both interactomes
Q8WV44	65	10	E3 ubiquitin-protein ligase TRIM41	E3 ubiquitin-protein ligase TRIM41	encountered in both interactomes
Q96IK5	65	4	Germ cell-less protein-like 1	Germ cell-less protein-like 1	encountered in both interactomes
Q96RT1	65	27	Protein LAP2	Protein LAP2	encountered in both interactomes
Q9NVV9	65	22	THAP domain-containing protein 1	THAP domain-containing protein 1	encountered in both interactomes
Q9UI14	65	42	Prenylated Rab acceptor protein 1	Prenylated Rab acceptor protein 1	encountered in both interactomes
O00257	64	32	E3 SUMO-protein ligase CBX4	E3 SUMO-protein ligase CBX4	encountered in both interactomes
O00487	64	17	26S proteasome non-ATPase regulatory subunit 14	26S proteasome non-ATPase regulatory subunit 14	encountered in both interactomes
O15524	64	44	Suppressor of cytokine signaling 1	Suppressor of cytokine signaling 1	encountered in both interactomes
P04350	64	54	Tubulin beta-4A chain	Tubulin beta-4A chain	encountered in both interactomes
P05129	64	52	Protein kinase C gamma type	Protein kinase C gamma type	encountered in both interactomes
P07355	64	48	Annexin A2	Annexin A2	encountered in both interactomes
P15313	64	3	V-type proton ATPase subunit B, kidney isoform	V-type proton ATPase subunit B, kidney isoform	encountered in both interactomes
P21580	64	32	Tumor necrosis factor alpha-induced protein 3	Tumor necrosis factor alpha-induced protein 3	encountered in both interactomes
P41182	64	81	B-cell lymphoma 6 protein	B-cell lymphoma 6 protein	encountered in both interactomes
P42566	64	51	Epidermal growth factor receptor substrate 15	Epidermal growth factor receptor substrate 15	encountered in both interactomes
P43246	64	47	DNA mismatch repair protein Msh2	DNA mismatch repair protein Msh2	encountered in both interactomes
P43360	64	43	Melanoma-associated antigen 6	Melanoma-associated antigen 6	encountered in both interactomes
P54132	64	46	Bloom syndrome protein	Bloom syndrome protein	encountered in both interactomes
P54252	64	33	Ataxin-3	Ataxin-3	encountered in both interactomes
P67809	64	46	Nuclease-sensitive element-binding protein 1	Nuclease-sensitive element-binding protein 1	encountered in both interactomes
Q02539	64	26	Histone H1.1	Histone H1.1	encountered in both interactomes
Q02750	64	47	Dual specificity mitogen-activated protein kinase kinase 1	Dual specificity mitogen-activated protein kinase kinase 1	encountered in both interactomes
Q99962	64	53	Endophilin-A1	Endophilin-A1	encountered in both interactomes
Q9HCM9	64	25	E3 ubiquitin-protein ligase TRIM39	Tripartite motif-containing protein 39	encountered in both interactomes
Q9UKR5	64	63	Probable ergosterol biosynthetic protein 28	Probable ergosterol biosynthetic protein 28	encountered in both interactomes
Q9Y4A5	64	53	Transformation/transcription domain-associated protein	Transformation/transcription domain-associated protein	encountered in both interactomes
O00401	63	35	Neural Wiskott-Aldrich syndrome protein	Neural Wiskott-Aldrich syndrome protein	encountered in both interactomes
O15151	63	39	Protein Mdm4	Protein Mdm4	encountered in both interactomes
O95816	63	28	BAG family molecular chaperone regulator 2	BAG family molecular chaperone regulator 2	encountered in both interactomes
P00747	63	50	Plasminogen	Plasminogen	encountered in both interactomes
P04278	63	50	Sex hormone-binding globulin	Sex hormone-binding globulin	encountered in both interactomes
P25205	63	57	DNA replication licensing factor MCM3	DNA replication licensing factor MCM3	encountered in both interactomes
P27695	63	40	DNA-(apurinic or apyrimidinic site) lyase	DNA-(apurinic or apyrimidinic site) lyase	encountered in both interactomes
P35579	63	50	Myosin-9	Myosin-9	encountered in both interactomes
P41220	63	58	Regulator of G-protein signaling 2	Regulator of G-protein signaling 2	encountered in both interactomes
P50148	63	45	Guanine nucleotide-binding protein G(q) subunit alpha	Guanine nucleotide-binding protein G(q) subunit alpha	encountered in both interactomes
Q01082	63	53	Spectrin beta chain, non-erythrocytic 1	Spectrin beta chain, brain 1	encountered in both interactomes
Q05193	63	52	Dynamin-1	Dynamin-1	encountered in both interactomes
Q06455	63	45	Protein CBFA2T1	Protein CBFA2T1	encountered in both interactomes
Q13155	63	46	Aminoacyl tRNA synthase complex-interacting multifunctional protein 2	Aminoacyl tRNA synthase complex-interacting multifunctional protein 2	encountered in both interactomes
Q15185	63	29	Prostaglandin E synthase 3	Prostaglandin E synthase 3	encountered in both interactomes
Q16623	63	59	Syntaxin-1A	Syntaxin-1A	encountered in both interactomes
Q8IWZ5	63		Tripartite motif-containing protein 42	Tripartite motif-containing protein 42	encountered only in PICKLE 2.0	common in RHCP
Q8IZH2	63	33	5'-3' exoribonuclease 1	5'-3' exoribonuclease 1	encountered in both interactomes
Q8NA61	63	5	Spermatid-associated protein	Spermatid-associated protein	encountered in both interactomes
Q92844	63	40	TRAF family member-associated NF-kappa-B activator	TRAF family member-associated NF-kappa-B activator	encountered in both interactomes
Q99689	63	59	Fasciculation and elongation protein zeta-1	Fasciculation and elongation protein zeta-1	encountered in both interactomes
Q9UKB1	63	31	F-box/WD repeat-containing protein 11	F-box/WD repeat-containing protein 11	encountered in both interactomes
O75386	62		Tubby-related protein 3	Tubby-related protein 3	encountered only in PICKLE 2.0	common in RHCP
O75530	62	46	Polycomb protein EED	Polycomb protein EED	encountered in both interactomes
O94972	62	36	E3 ubiquitin-protein ligase TRIM37	E3 ubiquitin-protein ligase TRIM37	encountered in both interactomes
P06733	62	21	Alpha-enolase	Alpha-enolase	encountered in both interactomes
P11362	62	51	Fibroblast growth factor receptor 1	Fibroblast growth factor receptor 1	encountered in both interactomes
P14859	62	55	POU domain, class 2, transcription factor 1	POU domain, class 2, transcription factor 1	encountered in both interactomes
P17980	62	32	26S protease regulatory subunit 6A	26S protease regulatory subunit 6A	encountered in both interactomes
P30304	62	30	M-phase inducer phosphatase 1	M-phase inducer phosphatase 1	encountered in both interactomes
P35226	62	41	Polycomb complex protein BMI-1	Polycomb complex protein BMI-1	encountered in both interactomes
P48729	62	47	Casein kinase I isoform alpha	Casein kinase I isoform alpha	encountered in both interactomes
P61289	62	43	Proteasome activator complex subunit 3	Proteasome activator complex subunit 3	encountered in both interactomes
Q07812	62	40	Apoptosis regulator BAX	Apoptosis regulator BAX	encountered in both interactomes
Q12772	62	48	Sterol regulatory element-binding protein 2	Sterol regulatory element-binding protein 2	encountered in both interactomes
Q14764	62	6	Major vault protein	Major vault protein	encountered in both interactomes
Q5VYK3	62	3	Proteasome-associated protein ECM29 homolog	Proteasome-associated protein ECM29 homolog	encountered in both interactomes
Q96JN2	62	8	Coiled-coil domain-containing protein 136	Coiled-coil domain-containing protein 136	encountered in both interactomes
Q96KM6	62	56	Zinc finger protein 512B	Zinc finger protein 512B	encountered in both interactomes
Q9H2X6	62	47	Homeodomain-interacting protein kinase 2	Homeodomain-interacting protein kinase 2	encountered in both interactomes
Q9NX58	62	80	Cell growth-regulating nucleolar protein	Cell growth-regulating nucleolar protein	encountered in both interactomes
Q9UBK2	62	47	Peroxisome proliferator-activated receptor gamma coactivator 1-alpha	Peroxisome proliferator-activated receptor gamma coactivator 1-alpha	encountered in both interactomes
Q9UQ80	62	27	Proliferation-associated protein 2G4	Proliferation-associated protein 2G4	encountered in both interactomes
O15519	61	47	CASP8 and FADD-like apoptosis regulator	CASP8 and FADD-like apoptosis regulator	encountered in both interactomes
O43707	61	42	Alpha-actinin-4	Alpha-actinin-4	encountered in both interactomes
O60925	61	60	Prefoldin subunit 1	Prefoldin subunit 1	encountered in both interactomes
P18031	61	56	Tyrosine-protein phosphatase non-receptor type 1	Tyrosine-protein phosphatase non-receptor type 1	encountered in both interactomes
P19525	61	53	Interferon-induced, double-stranded RNA-activated protein kinase	Interferon-induced, double-stranded RNA-activated protein kinase	encountered in both interactomes
P23258	61	39	Tubulin gamma-1 chain	Tubulin gamma-1 chain	encountered in both interactomes
P35968	61	49	Vascular endothelial growth factor receptor 2	Vascular endothelial growth factor receptor 2	encountered in both interactomes
P48552	61	52	Nuclear receptor-interacting protein 1	Nuclear receptor-interacting protein 1	encountered in both interactomes
P62879	61	30	Guanine nucleotide-binding protein G(I)/G(S)/G(T) subunit beta-2	Guanine nucleotide-binding protein G(I)/G(S)/G(T) subunit beta-2	encountered in both interactomes
Q14129	61		Protein DGCR6	Protein DGCR6	encountered only in PICKLE 2.0	common in RHCP
Q14247	61	45	Src substrate cortactin	Src substrate cortactin	encountered in both interactomes
Q7Z434	61	39	Mitochondrial antiviral-signaling protein	Mitochondrial antiviral-signaling protein	encountered in both interactomes
Q8WWY3	61	6	U4/U6 small nuclear ribonucleoprotein Prp31	U4/U6 small nuclear ribonucleoprotein Prp31	encountered in both interactomes
Q8WXA9	61	51	Splicing regulatory glutamine/lysine-rich protein 1	Splicing regulatory glutamine/lysine-rich protein 1	encountered in both interactomes
Q96EV8	61	42	Dysbindin	Dysbindin	encountered in both interactomes
Q9HC98	61	49	Serine/threonine-protein kinase Nek6	Serine/threonine-protein kinase Nek6	encountered in both interactomes
Q9UK80	61	2	Ubiquitin carboxyl-terminal hydrolase 21	Ubiquitin carboxyl-terminal hydrolase 21	encountered in both interactomes
Q9UKG1	61	22	DCC-interacting protein 13-alpha	DCC-interacting protein 13-alpha	encountered in both interactomes
Q9Y2X7	61	61	ARF GTPase-activating protein GIT1	ARF GTPase-activating protein GIT1	encountered in both interactomes
O14745	60	55	Na(+)/H(+) exchange regulatory cofactor NHE-RF1	Na(+)/H(+) exchange regulatory cofactor NHE-RF1	encountered in both interactomes
O43255	60	34	E3 ubiquitin-protein ligase SIAH2	E3 ubiquitin-protein ligase SIAH2	encountered in both interactomes
O43918	60	48	Autoimmune regulator	Autoimmune regulator	encountered in both interactomes
O75558	60	13	Syntaxin-11	Syntaxin-11	encountered in both interactomes
P07384	60	51	Calpain-1 catalytic subunit	Calpain-1 catalytic subunit	encountered in both interactomes
P15976	60	47	Erythroid transcription factor	Erythroid transcription factor	encountered in both interactomes
P27797	60	48	Calreticulin	Calreticulin	encountered in both interactomes
P40818	60	35	Ubiquitin carboxyl-terminal hydrolase 8	Ubiquitin carboxyl-terminal hydrolase 8	encountered in both interactomes
P42336	60	46	Phosphatidylinositol 4,5-bisphosphate 3-kinase catalytic subunit alpha isoform	Phosphatidylinositol-4,5-bisphosphate 3-kinase catalytic subunit alpha isoform	encountered in both interactomes
P49427	60	28	Ubiquitin-conjugating enzyme E2 R1	Ubiquitin-conjugating enzyme E2 R1	encountered in both interactomes
P51587	60	49	Breast cancer type 2 susceptibility protein	Breast cancer type 2 susceptibility protein	encountered in both interactomes
P78347	60	38	General transcription factor II-I	General transcription factor II-I	encountered in both interactomes
Q6P1J9	60	40	Parafibromin	Parafibromin	encountered in both interactomes
Q7Z6G3	60	26	N-terminal EF-hand calcium-binding protein 2	N-terminal EF-hand calcium-binding protein 2	encountered in both interactomes
Q86TM6	60	32	E3 ubiquitin-protein ligase synoviolin	E3 ubiquitin-protein ligase synoviolin	encountered in both interactomes
Q99836	60	33	Myeloid differentiation primary response protein MyD88	Myeloid differentiation primary response protein MyD88	encountered in both interactomes
Q9H8W4	60	35	Pleckstrin homology domain-containing family F member 2	Pleckstrin homology domain-containing family F member 2	encountered in both interactomes
Q9HBZ2	60	8	Aryl hydrocarbon receptor nuclear translocator 2	Aryl hydrocarbon receptor nuclear translocator 2	encountered in both interactomes
Q9HD26	60	20	Golgi-associated PDZ and coiled-coil motif-containing protein	Golgi-associated PDZ and coiled-coil motif-containing protein	encountered in both interactomes
Q9UGL1	60	41	Lysine-specific demethylase 5B	Lysine-specific demethylase 5B	encountered in both interactomes
Q9UJX2	60	18	Cell division cycle protein 23 homolog	Cell division cycle protein 23 homolog	encountered in both interactomes
Q9Y383	60	52	Putative RNA-binding protein Luc7-like 2	Putative RNA-binding protein Luc7-like 2	encountered in both interactomes
O76003	59	23	Glutaredoxin-3	Glutaredoxin-3	encountered in both interactomes
O95257	59	49	Growth arrest and DNA damage-inducible protein GADD45 gamma	Growth arrest and DNA damage-inducible protein GADD45 gamma	encountered in both interactomes
P02649	59	18	Apolipoprotein E	Apolipoprotein E	encountered in both interactomes
P36956	59	46	Sterol regulatory element-binding protein 1	Sterol regulatory element-binding protein 1	encountered in both interactomes
P50613	59	38	Cyclin-dependent kinase 7	Cyclin-dependent kinase 7	encountered in both interactomes
Q13107	59	21	Ubiquitin carboxyl-terminal hydrolase 4	Ubiquitin carboxyl-terminal hydrolase 4	encountered in both interactomes
Q13451	59	18	Peptidyl-prolyl cis-trans isomerase FKBP5	Peptidyl-prolyl cis-trans isomerase FKBP5	encountered in both interactomes
Q14683	59	49	Structural maintenance of chromosomes protein 1A	Structural maintenance of chromosomes protein 1A	encountered in both interactomes
Q15466	59	43	Nuclear receptor subfamily 0 group B member 2	Nuclear receptor subfamily 0 group B member 2	encountered in both interactomes
Q15691	59	23	Microtubule-associated protein RP/EB family member 1	Microtubule-associated protein RP/EB family member 1	encountered in both interactomes
Q8TD31	59	4	Coiled-coil alpha-helical rod protein 1	Coiled-coil alpha-helical rod protein 1	encountered in both interactomes
Q8TEW0	59	43	Partitioning defective 3 homolog	Partitioning defective 3 homolog	encountered in both interactomes
Q92997	59	36	Segment polarity protein dishevelled homolog DVL-3	Segment polarity protein dishevelled homolog DVL-3	encountered in both interactomes
Q96EZ8	59	51	Microspherule protein 1	Microspherule protein 1	encountered in both interactomes
Q9BUJ2	59	29	Heterogeneous nuclear ribonucleoprotein U-like protein 1	Heterogeneous nuclear ribonucleoprotein U-like protein 1	encountered in both interactomes
Q9UBC3	59	46	DNA (cytosine-5)-methyltransferase 3B	DNA (cytosine-5)-methyltransferase 3B	encountered in both interactomes
O14776	58	55	Transcription elongation regulator 1	Transcription elongation regulator 1	encountered in both interactomes
O75531	58	54	Barrier-to-autointegration factor	Barrier-to-autointegration factor	encountered in both interactomes
O76064	58	16	E3 ubiquitin-protein ligase RNF8	E3 ubiquitin-protein ligase RNF8	encountered in both interactomes
P04629	58	45	High affinity nerve growth factor receptor	High affinity nerve growth factor receptor	encountered in both interactomes
P14678	58	48	Small nuclear ribonucleoprotein-associated proteins B and B'	Small nuclear ribonucleoprotein-associated proteins B and B'	encountered in both interactomes
P31689	58	46	DnaJ homolog subfamily A member 1	DnaJ homolog subfamily A member 1	encountered in both interactomes
P52272	58	44	Heterogeneous nuclear ribonucleoprotein M	Heterogeneous nuclear ribonucleoprotein M	encountered in both interactomes
P52565	58	51	Rho GDP-dissociation inhibitor 1	Rho GDP-dissociation inhibitor 1	encountered in both interactomes
Q12929	58	29	Epidermal growth factor receptor kinase substrate 8	Epidermal growth factor receptor kinase substrate 8	encountered in both interactomes
Q13185	58	42	Chromobox protein homolog 3	Chromobox protein homolog 3	encountered in both interactomes
Q14457	58	19	Beclin-1	Beclin-1	encountered in both interactomes
Q15427	58	24	Splicing factor 3B subunit 4	Splicing factor 3B subunit 4	encountered in both interactomes
Q92841	58	31	Probable ATP-dependent RNA helicase DDX17	Probable ATP-dependent RNA helicase DDX17	encountered in both interactomes
Q93074	58	56	Mediator of RNA polymerase II transcription subunit 12	Mediator of RNA polymerase II transcription subunit 12	encountered in both interactomes
Q99717	58	49	Mothers against decapentaplegic homolog 5	Mothers against decapentaplegic homolog 5	encountered in both interactomes
Q9BQY4	58	43	Rhox homeobox family member 2	Rhox homeobox family member 2	encountered in both interactomes
Q9UNN5	58	51	FAS-associated factor 1	FAS-associated factor 1	encountered in both interactomes
P14923	57	49	Junction plakoglobin	Junction plakoglobin	encountered in both interactomes
P17028	57	43	Zinc finger protein 24	Zinc finger protein 24	encountered in both interactomes
P19474	57	29	E3 ubiquitin-protein ligase TRIM21	E3 ubiquitin-protein ligase TRIM21	encountered in both interactomes
P28702	57	52	Retinoic acid receptor RXR-beta	Retinoic acid receptor RXR-beta	encountered in both interactomes
P32780	57	38	General transcription factor IIH subunit 1	General transcription factor IIH subunit 1	encountered in both interactomes
P46937	57	33	Transcriptional coactivator YAP1	Yorkie homolog	encountered in both interactomes
P53618	57	29	Coatomer subunit beta	Coatomer subunit beta	encountered in both interactomes
Q01130	57	33	Serine/arginine-rich splicing factor 2	Serine/arginine-rich splicing factor 2	encountered in both interactomes
Q13049	57	18	E3 ubiquitin-protein ligase TRIM32	E3 ubiquitin-protein ligase TRIM32	encountered in both interactomes
Q13064	57	19	Probable E3 ubiquitin-protein ligase makorin-3	Probable E3 ubiquitin-protein ligase makorin-3	encountered in both interactomes
Q13950	57	43	Runt-related transcription factor 2	Runt-related transcription factor 2	encountered in both interactomes
Q14566	57	42	DNA replication licensing factor MCM6	DNA replication licensing factor MCM6	encountered in both interactomes
Q16512	57	36	Serine/threonine-protein kinase N1	Serine/threonine-protein kinase N1	encountered in both interactomes
Q53EZ4	57	14	Centrosomal protein of 55 kDa	Centrosomal protein of 55 kDa	encountered in both interactomes
Q86X55	57	43	Histone-arginine methyltransferase CARM1	Histone-arginine methyltransferase CARM1	encountered in both interactomes
Q99081	57	25	Transcription factor 12	Transcription factor 12	encountered in both interactomes
Q99814	57	30	Endothelial PAS domain-containing protein 1	Endothelial PAS domain-containing protein 1	encountered in both interactomes
Q9H0E2	57	35	Toll-interacting protein	Toll-interacting protein	encountered in both interactomes
Q9Y2J4	57	13	Angiomotin-like protein 2	Angiomotin-like protein 2	encountered in both interactomes
O00255	56	51	Menin	Menin	encountered in both interactomes
O95999	56	39	B-cell lymphoma/leukemia 10	B-cell lymphoma/leukemia 10	encountered in both interactomes
P08138	56	54	Tumor necrosis factor receptor superfamily member 16	Tumor necrosis factor receptor superfamily member 16	encountered in both interactomes
P18754	56	53	Regulator of chromosome condensation	Regulator of chromosome condensation	encountered in both interactomes
P29474	56	17	Nitric oxide synthase, endothelial	Nitric oxide synthase, endothelial	encountered in both interactomes
P30101	56	44	Protein disulfide-isomerase A3	Protein disulfide-isomerase A3	encountered in both interactomes
P40222	56	10	Alpha-taxilin	Alpha-taxilin	encountered in both interactomes
P51692	56	48	Signal transducer and activator of transcription 5B	Signal transducer and activator of transcription 5B	encountered in both interactomes
P55055	56	45	Oxysterols receptor LXR-beta	Oxysterols receptor LXR-beta	encountered in both interactomes
P61968	56	30	LIM domain transcription factor LMO4	LIM domain transcription factor LMO4	encountered in both interactomes
Q08999	56	51	Retinoblastoma-like protein 2	Retinoblastoma-like protein 2	encountered in both interactomes
Q13387	56	53	C-Jun-amino-terminal kinase-interacting protein 2	C-Jun-amino-terminal kinase-interacting protein 2	encountered in both interactomes
Q14653	56	30	Interferon regulatory factor 3	Interferon regulatory factor 3	encountered in both interactomes
Q15637	56	25	Splicing factor 1	Splicing factor 1	encountered in both interactomes
Q9UKY1	56	52	Zinc fingers and homeoboxes protein 1	Zinc fingers and homeoboxes protein 1	encountered in both interactomes
Q9UM73	56	47	ALK tyrosine kinase receptor	ALK tyrosine kinase receptor	encountered in both interactomes
Q9UQE7	56	47	Structural maintenance of chromosomes protein 3	Structural maintenance of chromosomes protein 3	encountered in both interactomes
Q9Y6X2	56	42	E3 SUMO-protein ligase PIAS3	E3 SUMO-protein ligase PIAS3	encountered in both interactomes
O00463	55	29	TNF receptor-associated factor 5	TNF receptor-associated factor 5	encountered in both interactomes
O60504	55	27	Vinexin	Vinexin	encountered in both interactomes
O95793	55	46	Double-stranded RNA-binding protein Staufen homolog 1	Double-stranded RNA-binding protein Staufen homolog 1	encountered in both interactomes
P06753	55	31	Tropomyosin alpha-3 chain	Tropomyosin alpha-3 chain	encountered in both interactomes
P49792	55	37	E3 SUMO-protein ligase RanBP2	E3 SUMO-protein ligase RanBP2	encountered in both interactomes
P60228	55	44	Eukaryotic translation initiation factor 3 subunit E	Eukaryotic translation initiation factor 3 subunit E	encountered in both interactomes
P63010	55	37	AP-2 complex subunit beta	AP-2 complex subunit beta	encountered in both interactomes
Q05586	55	49	Glutamate receptor ionotropic, NMDA 1	Glutamate [NMDA] receptor subunit zeta-1	encountered in both interactomes
Q13873	55	51	Bone morphogenetic protein receptor type-2	Bone morphogenetic protein receptor type-2	encountered in both interactomes
Q14318	55	10	Peptidyl-prolyl cis-trans isomerase FKBP8	Peptidyl-prolyl cis-trans isomerase FKBP8	encountered in both interactomes
Q15008	55	55	26S proteasome non-ATPase regulatory subunit 6	26S proteasome non-ATPase regulatory subunit 6	encountered in both interactomes
Q15418	55	51	Ribosomal protein S6 kinase alpha-1	Ribosomal protein S6 kinase alpha-1	encountered in both interactomes
Q92835	55	41	Phosphatidylinositol 3,4,5-trisphosphate 5-phosphatase 1	Phosphatidylinositol-3,4,5-trisphosphate 5-phosphatase 1	encountered in both interactomes
Q9Y3Q8	55	33	TSC22 domain family protein 4	TSC22 domain family protein 4	encountered in both interactomes
F7VJQ1	54		Alternative prion protein	-	encountered only in PICKLE 2.0	newly added in RHCP; Category 2
O95071	54	31	E3 ubiquitin-protein ligase UBR5	E3 ubiquitin-protein ligase UBR5	encountered in both interactomes
P09936	54	25	Ubiquitin carboxyl-terminal hydrolase isozyme L1	Ubiquitin carboxyl-terminal hydrolase isozyme L1	encountered in both interactomes
P11388	54	37	DNA topoisomerase 2-alpha	DNA topoisomerase 2-alpha	encountered in both interactomes
P23528	54	44	Cofilin-1	Cofilin-1	encountered in both interactomes
P25098	54	45	Beta-adrenergic receptor kinase 1	Beta-adrenergic receptor kinase 1	encountered in both interactomes
P35998	54	36	26S protease regulatory subunit 7	26S protease regulatory subunit 7	encountered in both interactomes
P49674	54	38	Casein kinase I isoform epsilon	Casein kinase I isoform epsilon	encountered in both interactomes
P51693	54	51	Amyloid-like protein 1	Amyloid-like protein 1	encountered in both interactomes
P54646	54	13	5'-AMP-activated protein kinase catalytic subunit alpha-2	5'-AMP-activated protein kinase catalytic subunit alpha-2	encountered in both interactomes
P98164	54	50	Low-density lipoprotein receptor-related protein 2	Low-density lipoprotein receptor-related protein 2	encountered in both interactomes
Q05209	54	33	Tyrosine-protein phosphatase non-receptor type 12	Tyrosine-protein phosphatase non-receptor type 12	encountered in both interactomes
Q15370	54	27	Transcription elongation factor B polypeptide 2	Transcription elongation factor B polypeptide 2	encountered in both interactomes
Q68D86	54		Coiled-coil domain-containing protein 102B	Coiled-coil domain-containing protein 102B	encountered only in PICKLE 2.0	common in RHCP
Q8WUI4	54	49	Histone deacetylase 7	Histone deacetylase 7	encountered in both interactomes
Q96AZ1	54		Protein-lysine methyltransferase METTL21B	Protein FAM119B	encountered only in PICKLE 2.0	common in RHCP
Q9BQA1	54	30	Methylosome protein 50	Methylosome protein 50	encountered in both interactomes
Q9GZX7	54	11	Single-stranded DNA cytosine deaminase	Activation-induced cytidine deaminase	encountered in both interactomes
Q9NS23	54	40	Ras association domain-containing protein 1	Ras association domain-containing protein 1	encountered in both interactomes
Q9Y2I6	54	38	Ninein-like protein	Ninein-like protein	encountered in both interactomes
O00499	53	40	Myc box-dependent-interacting protein 1	Myc box-dependent-interacting protein 1	encountered in both interactomes
O14777	53	28	Kinetochore protein NDC80 homolog	Kinetochore protein NDC80 homolog	encountered in both interactomes
O95503	53	16	Chromobox protein homolog 6	Chromobox protein homolog 6	encountered in both interactomes
O95983	53	33	Methyl-CpG-binding domain protein 3	Methyl-CpG-binding domain protein 3	encountered in both interactomes
P02766	53	47	Transthyretin	Transthyretin	encountered in both interactomes
P16070	53	43	CD44 antigen	CD44 antigen	encountered in both interactomes
P18847	53	31	Cyclic AMP-dependent transcription factor ATF-3	Cyclic AMP-dependent transcription factor ATF-3	encountered in both interactomes
P31751	53	26	RAC-beta serine/threonine-protein kinase	RAC-beta serine/threonine-protein kinase	encountered in both interactomes
Q06587	53	39	E3 ubiquitin-protein ligase RING1	E3 ubiquitin-protein ligase RING1	encountered in both interactomes
Q07157	53	58	Tight junction protein ZO-1	Tight junction protein ZO-1	encountered in both interactomes
Q7Z6Z7	53	28	E3 ubiquitin-protein ligase HUWE1	E3 ubiquitin-protein ligase HUWE1	encountered in both interactomes
Q969F0	53	11	Fetal and adult testis-expressed transcript protein	Fetal and adult testis-expressed transcript protein	encountered in both interactomes
Q96EY1	53	34	DnaJ homolog subfamily A member 3, mitochondrial	DnaJ homolog subfamily A member 3, mitochondrial	encountered in both interactomes
O00231	52	40	26S proteasome non-ATPase regulatory subunit 11	26S proteasome non-ATPase regulatory subunit 11	encountered in both interactomes
O43504	52	13	Ragulator complex protein LAMTOR5	Hepatitis B virus X-interacting protein	encountered in both interactomes
O43541	52	26	Mothers against decapentaplegic homolog 6	Mothers against decapentaplegic homolog 6	encountered in both interactomes
O76071	52	53	Probable cytosolic iron-sulfur protein assembly protein CIAO1	Probable cytosolic iron-sulfur protein assembly protein CIAO1	encountered in both interactomes
O95251	52	51	Histone acetyltransferase KAT7	Histone acetyltransferase KAT7	encountered in both interactomes
O95477	52	41	ATP-binding cassette sub-family A member 1	ATP-binding cassette sub-family A member 1	encountered in both interactomes
P01137	52	46	Transforming growth factor beta-1	Transforming growth factor beta-1	encountered in both interactomes
P13984	52	49	General transcription factor IIF subunit 2	General transcription factor IIF subunit 2	encountered in both interactomes
P15924	52	47	Desmoplakin	Desmoplakin	encountered in both interactomes
P55211	52	43	Caspase-9	Caspase-9	encountered in both interactomes
P55957	52	47	BH3-interacting domain death agonist	BH3-interacting domain death agonist	encountered in both interactomes
P62140	52	40	Serine/threonine-protein phosphatase PP1-beta catalytic subunit	Serine/threonine-protein phosphatase PP1-beta catalytic subunit	encountered in both interactomes
Q07820	52	38	Induced myeloid leukemia cell differentiation protein Mcl-1	Induced myeloid leukemia cell differentiation protein Mcl-1	encountered in both interactomes
Q13287	52	31	N-myc-interactor	N-myc-interactor	encountered in both interactomes
Q13347	52	50	Eukaryotic translation initiation factor 3 subunit I	Eukaryotic translation initiation factor 3 subunit I	encountered in both interactomes
Q13503	52	39	Mediator of RNA polymerase II transcription subunit 21	Mediator of RNA polymerase II transcription subunit 21	encountered in both interactomes
Q14511	52	37	Enhancer of filamentation 1	Enhancer of filamentation 1	encountered in both interactomes
Q15022	52	31	Polycomb protein SUZ12	Polycomb protein SUZ12	encountered in both interactomes
Q15393	52	39	Splicing factor 3B subunit 3	Splicing factor 3B subunit 3	encountered in both interactomes
Q5RL73	52	53	RNA-binding protein 48	UPF0712 protein C7orf64	encountered in both interactomes
Q6R327	52	35	Rapamycin-insensitive companion of mTOR	Rapamycin-insensitive companion of mTOR	encountered in both interactomes
Q8N1B4	52	3	Vacuolar protein sorting-associated protein 52 homolog	Vacuolar protein sorting-associated protein 52 homolog	encountered in both interactomes
Q96BR9	52	18	Zinc finger and BTB domain-containing protein 8A	Zinc finger and BTB domain-containing protein 8A	encountered in both interactomes
Q96PU4	52	35	E3 ubiquitin-protein ligase UHRF2	E3 ubiquitin-protein ligase UHRF2	encountered in both interactomes
Q99608	52	24	Necdin	Necdin	encountered in both interactomes
Q9BYQ4	52	1	Keratin-associated protein 9-2	Keratin-associated protein 9-2	encountered in both interactomes
Q9UKV8	52	26	Protein argonaute-2	Protein argonaute-2	encountered in both interactomes
O00571	51	43	ATP-dependent RNA helicase DDX3X	ATP-dependent RNA helicase DDX3X	encountered in both interactomes
O60566	51	25	Mitotic checkpoint serine/threonine-protein kinase BUB1 beta	Mitotic checkpoint serine/threonine-protein kinase BUB1 beta	encountered in both interactomes
O94817	51	48	Ubiquitin-like protein ATG12	Ubiquitin-like protein ATG12	encountered in both interactomes
O95777	51	31	U6 snRNA-associated Sm-like protein LSm8	N-alpha-acetyltransferase 38, NatC auxiliary subunit	encountered in both interactomes
O95967	51	38	EGF-containing fibulin-like extracellular matrix protein 2	EGF-containing fibulin-like extracellular matrix protein 2	encountered in both interactomes
P17542	51	53	T-cell acute lymphocytic leukemia protein 1	T-cell acute lymphocytic leukemia protein 1	encountered in both interactomes
P26038	51	45	Moesin	Moesin	encountered in both interactomes
P41743	51	46	Protein kinase C iota type	Protein kinase C iota type	encountered in both interactomes
P49815	51	47	Tuberin	Tuberin	encountered in both interactomes
P62191	51	28	26S protease regulatory subunit 4	26S protease regulatory subunit 4	encountered in both interactomes
P62834	51	45	Ras-related protein Rap-1A	Ras-related protein Rap-1A	encountered in both interactomes
P78317	51	31	E3 ubiquitin-protein ligase RNF4	E3 ubiquitin ligase RNF4	encountered in both interactomes
Q08AM6	51	6	Protein VAC14 homolog	Protein VAC14 homolog	encountered in both interactomes
Q12846	51	35	Syntaxin-4	Syntaxin-4	encountered in both interactomes
Q12906	51	24	Interleukin enhancer-binding factor 3	Interleukin enhancer-binding factor 3	encountered in both interactomes
Q13748	51	46	Tubulin alpha-3C/D chain	Tubulin alpha-3C/D chain	encountered in both interactomes
Q6NT76	51		Homeobox-containing protein 1	Homeobox-containing protein 1	encountered only in PICKLE 2.0	common in RHCP
Q6ZNA4	51	25	E3 ubiquitin-protein ligase Arkadia	E3 ubiquitin-protein ligase Arkadia	encountered in both interactomes
Q8N205	51	6	Nesprin-4	Nesprin-4	encountered in both interactomes
Q8N668	51	34	COMM domain-containing protein 1	COMM domain-containing protein 1	encountered in both interactomes
Q92574	51	45	Hamartin	Hamartin	encountered in both interactomes
Q96PU8	51	36	Protein quaking	Protein quaking	encountered in both interactomes
Q9BXM7	51	10	Serine/threonine-protein kinase PINK1, mitochondrial	Serine/threonine-protein kinase PINK1, mitochondrial	encountered in both interactomes
Q9BZR9	51	9	Probable E3 ubiquitin-protein ligase TRIM8	Probable E3 ubiquitin-protein ligase TRIM8	encountered in both interactomes
Q9NPJ6	51	21	Mediator of RNA polymerase II transcription subunit 4	Mediator of RNA polymerase II transcription subunit 4	encountered in both interactomes
Q9NQ11	51	1	Probable cation-transporting ATPase 13A2	Probable cation-transporting ATPase 13A2	encountered in both interactomes
Q9NS73	51	21	MAP3K12-binding inhibitory protein 1	MAP3K12-binding inhibitory protein 1	encountered in both interactomes
Q9UMS4	51	21	Pre-mRNA-processing factor 19	Pre-mRNA-processing factor 19	encountered in both interactomes
O15164	50	34	Transcription intermediary factor 1-alpha	Transcription intermediary factor 1-alpha	encountered in both interactomes
O43251	50	24	RNA binding protein fox-1 homolog 2	RNA binding protein fox-1 homolog 2	encountered in both interactomes
O43586	50	51	Proline-serine-threonine phosphatase-interacting protein 1	Proline-serine-threonine phosphatase-interacting protein 1	encountered in both interactomes
O60573	50	10	Eukaryotic translation initiation factor 4E type 2	Eukaryotic translation initiation factor 4E type 2	encountered in both interactomes
O75533	50	51	Splicing factor 3B subunit 1	Splicing factor 3B subunit 1	encountered in both interactomes
O96019	50	41	Actin-like protein 6A	Actin-like protein 6A	encountered in both interactomes
P05107	50	47	Integrin beta-2	Integrin beta-2	encountered in both interactomes
P14598	50	41	Neutrophil cytosol factor 1	Neutrophil cytosol factor 1	encountered in both interactomes
P22607	50	45	Fibroblast growth factor receptor 3	Fibroblast growth factor receptor 3	encountered in both interactomes
P33992	50	33	DNA replication licensing factor MCM5	DNA replication licensing factor MCM5	encountered in both interactomes
P52294	50	36	Importin subunit alpha-5	Importin subunit alpha-1	encountered in both interactomes
P55081	50	1	Microfibrillar-associated protein 1	Microfibrillar-associated protein 1	encountered in both interactomes
Q13642	50	22	Four and a half LIM domains protein 1	Four and a half LIM domains protein 1	encountered in both interactomes
Q15291	50	43	Retinoblastoma-binding protein 5	Retinoblastoma-binding protein 5	encountered in both interactomes
Q8N653	50	50	Leucine-zipper-like transcriptional regulator 1	Leucine-zipper-like transcriptional regulator 1	encountered in both interactomes
Q8TBK6	50	8	Zinc finger CCHC domain-containing protein 10	Zinc finger CCHC domain-containing protein 10	encountered in both interactomes
Q96CW1	50	40	AP-2 complex subunit mu	AP-2 complex subunit mu	encountered in both interactomes
Q99497	50	35	Protein DJ-1	Protein DJ-1	encountered in both interactomes
Q99963	50	46	Endophilin-A3	Endophilin-A3	encountered in both interactomes
Q9NRD5	50	46	PRKCA-binding protein	PRKCA-binding protein	encountered in both interactomes
Q9UM47	50	17	Neurogenic locus notch homolog protein 3	Neurogenic locus notch homolog protein 3	encountered in both interactomes
O75716	49	21	Serine/threonine-protein kinase 16	Serine/threonine-protein kinase 16	encountered in both interactomes
O95376	49	38	E3 ubiquitin-protein ligase ARIH2	E3 ubiquitin-protein ligase ARIH2	encountered in both interactomes
P01730	49	88	T-cell surface glycoprotein CD4	T-cell surface glycoprotein CD4	encountered in both interactomes
P05106	49	50	Integrin beta-3	Integrin beta-3	encountered in both interactomes
P06730	49	32	Eukaryotic translation initiation factor 4E	Eukaryotic translation initiation factor 4E	encountered in both interactomes
P08754	49	35	Guanine nucleotide-binding protein G(k) subunit alpha	Guanine nucleotide-binding protein G(k) subunit alpha	encountered in both interactomes
P14136	49	27	Glial fibrillary acidic protein	Glial fibrillary acidic protein	encountered in both interactomes
P14625	49	37	Endoplasmin	Endoplasmin	encountered in both interactomes
P17480	49	39	Nucleolar transcription factor 1	Nucleolar transcription factor 1	encountered in both interactomes
P17947	49	44	Transcription factor PU.1	Transcription factor PU.1	encountered in both interactomes
P19388	49	39	DNA-directed RNA polymerases I, II, and III subunit RPABC1	DNA-directed RNA polymerases I, II, and III subunit RPABC1	encountered in both interactomes
P21796	49	47	Voltage-dependent anion-selective channel protein 1	Voltage-dependent anion-selective channel protein 1	encountered in both interactomes
P29466	49	39	Caspase-1	Caspase-1	encountered in both interactomes
P42226	49	37	Signal transducer and activator of transcription 6	Signal transducer and activator of transcription 6	encountered in both interactomes
P43220	49	5	Glucagon-like peptide 1 receptor	Glucagon-like peptide 1 receptor	encountered in both interactomes
P54277	49	47	PMS1 protein homolog 1	PMS1 protein homolog 1	encountered in both interactomes
P68363	49	28	Tubulin alpha-1B chain	Tubulin alpha-1B chain	encountered in both interactomes
P78371	49	23	T-complex protein 1 subunit beta	T-complex protein 1 subunit beta	encountered in both interactomes
Q13224	49	41	Glutamate receptor ionotropic, NMDA 2B	Glutamate [NMDA] receptor subunit epsilon-2	encountered in both interactomes
Q13435	49	21	Splicing factor 3B subunit 2	Splicing factor 3B subunit 2	encountered in both interactomes
Q14204	49	32	Cytoplasmic dynein 1 heavy chain 1	Cytoplasmic dynein 1 heavy chain 1	encountered in both interactomes
Q86VP1	49	12	Tax1-binding protein 1	Tax1-binding protein 1	encountered in both interactomes
Q8TAP6	49	13	Centrosomal protein of 76 kDa	Centrosomal protein of 76 kDa	encountered in both interactomes
Q92547	49	32	DNA topoisomerase 2-binding protein 1	DNA topoisomerase 2-binding protein 1	encountered in both interactomes
Q93008	49	32	Probable ubiquitin carboxyl-terminal hydrolase FAF-X	Probable ubiquitin carboxyl-terminal hydrolase FAF-X	encountered in both interactomes
Q9BQ95	49	7	Evolutionarily conserved signaling intermediate in Toll pathway, mitochondrial	Evolutionarily conserved signaling intermediate in Toll pathway, mitochondrial	encountered in both interactomes
Q9BUN8	49	18	Derlin-1	Derlin-1	encountered in both interactomes
Q9H211	49	42	DNA replication factor Cdt1	DNA replication factor Cdt1	encountered in both interactomes
Q9P0W5	49	49	Schwannomin-interacting protein 1	Schwannomin-interacting protein 1	encountered in both interactomes
Q9Y5K6	49	27	CD2-associated protein	CD2-associated protein	encountered in both interactomes
O00267	48	35	Transcription elongation factor SPT5	Transcription elongation factor SPT5	encountered in both interactomes
O14640	48	37	Segment polarity protein dishevelled homolog DVL-1	Segment polarity protein dishevelled homolog DVL-1	encountered in both interactomes
O60563	48	39	Cyclin-T1	Cyclin-T1	encountered in both interactomes
O75478	48	14	Transcriptional adapter 2-alpha	Transcriptional adapter 2-alpha	encountered in both interactomes
P08621	48	40	U1 small nuclear ribonucleoprotein 70 kDa	U1 small nuclear ribonucleoprotein 70 kDa	encountered in both interactomes
P20700	48	35	Lamin-B1	Lamin-B1	encountered in both interactomes
P20963	48	39	T-cell surface glycoprotein CD3 zeta chain	T-cell surface glycoprotein CD3 zeta chain	encountered in both interactomes
P22087	48	54	rRNA 2'-O-methyltransferase fibrillarin	rRNA 2'-O-methyltransferase fibrillarin	encountered in both interactomes
P24863	48	15	Cyclin-C	Cyclin-C	encountered in both interactomes
P29317	48	22	Ephrin type-A receptor 2	Ephrin type-A receptor 2	encountered in both interactomes
P83916	48	35	Chromobox protein homolog 1	Chromobox protein homolog 1	encountered in both interactomes
Q02363	48	38	DNA-binding protein inhibitor ID-2	DNA-binding protein inhibitor ID-2	encountered in both interactomes
Q12778	48	38	Forkhead box protein O1	Forkhead box protein O1	encountered in both interactomes
Q13188	48	14	Serine/threonine-protein kinase 3	Serine/threonine-protein kinase 3	encountered in both interactomes
Q13352	48	40	Centromere protein R	Centromere protein R	encountered in both interactomes
Q14152	48	38	Eukaryotic translation initiation factor 3 subunit A	Eukaryotic translation initiation factor 3 subunit A	encountered in both interactomes
Q8NHY2	48	35	E3 ubiquitin-protein ligase RFWD2	E3 ubiquitin-protein ligase RFWD2	encountered in both interactomes
Q8TAD8	48	34	Smad nuclear-interacting protein 1	Smad nuclear-interacting protein 1	encountered in both interactomes
Q8TES7	48	11	Fas-binding factor 1	Fas-binding factor 1	encountered in both interactomes
Q92934	48	39	Bcl2-associated agonist of cell death	Bcl2 antagonist of cell death	encountered in both interactomes
Q96B26	48	27	Exosome complex component RRP43	Exosome complex component RRP43	encountered in both interactomes
Q96DZ9	48	7	CKLF-like MARVEL transmembrane domain-containing protein 5	CKLF-like MARVEL transmembrane domain-containing protein 5	encountered in both interactomes
Q9H2G9	48	7	Golgin-45	Golgin-45	encountered in both interactomes
Q9Y5B0	48	21	RNA polymerase II subunit A C-terminal domain phosphatase	RNA polymerase II subunit A C-terminal domain phosphatase	encountered in both interactomes
O14576	47	34	Cytoplasmic dynein 1 intermediate chain 1	Cytoplasmic dynein 1 intermediate chain 1	encountered in both interactomes
O60244	47	42	Mediator of RNA polymerase II transcription subunit 14	Mediator of RNA polymerase II transcription subunit 14	encountered in both interactomes
O75923	47	4	Dysferlin	Dysferlin	encountered in both interactomes
P00540	47	5	Proto-oncogene serine/threonine-protein kinase mos	Proto-oncogene serine/threonine-protein kinase mos	encountered in both interactomes
P05787	47	33	Keratin, type II cytoskeletal 8	Keratin, type II cytoskeletal 8	encountered in both interactomes
P07949	47	38	Proto-oncogene tyrosine-protein kinase receptor Ret	Proto-oncogene tyrosine-protein kinase receptor Ret	encountered in both interactomes
P12755	47	34	Ski oncogene	Ski oncogene	encountered in both interactomes
P16885	47	39	1-phosphatidylinositol 4,5-bisphosphate phosphodiesterase gamma-2	1-phosphatidylinositol-4,5-bisphosphate phosphodiesterase gamma-2	encountered in both interactomes
P18084	47	28	Integrin beta-5	Integrin beta-5	encountered in both interactomes
P19235	47	41	Erythropoietin receptor	Erythropoietin receptor	encountered in both interactomes
P20749	47	41	B-cell lymphoma 3 protein	B-cell lymphoma 3 protein	encountered in both interactomes
P29597	47	34	Non-receptor tyrosine-protein kinase TYK2	Non-receptor tyrosine-protein kinase TYK2	encountered in both interactomes
P51948	47	24	CDK-activating kinase assembly factor MAT1	CDK-activating kinase assembly factor MAT1	encountered in both interactomes
P62714	47	75	Serine/threonine-protein phosphatase 2A catalytic subunit beta isoform	Serine/threonine-protein phosphatase 2A catalytic subunit beta isoform	encountered in both interactomes
P68032	47	35	Actin, alpha cardiac muscle 1	Actin, alpha cardiac muscle 1	encountered in both interactomes
P84077	47	43	ADP-ribosylation factor 1	ADP-ribosylation factor 1	encountered in both interactomes
Q08945	47	37	FACT complex subunit SSRP1	FACT complex subunit SSRP1	encountered in both interactomes
Q14315	47	30	Filamin-C	Filamin-C	encountered in both interactomes
Q14451	47	41	Growth factor receptor-bound protein 7	Growth factor receptor-bound protein 7	encountered in both interactomes
Q14781	47	13	Chromobox protein homolog 2	Chromobox protein homolog 2	encountered in both interactomes
Q15257	47	30	Serine/threonine-protein phosphatase 2A activator	Serine/threonine-protein phosphatase 2A activator	encountered in both interactomes
Q15744	47	29	CCAAT/enhancer-binding protein epsilon	CCAAT/enhancer-binding protein epsilon	encountered in both interactomes
Q15831	47	34	Serine/threonine-protein kinase STK11	Serine/threonine-protein kinase STK11	encountered in both interactomes
Q8IYF3	47	25	Testis-expressed sequence 11 protein	Testis-expressed sequence 11 protein	encountered in both interactomes
Q92569	47	36	Phosphatidylinositol 3-kinase regulatory subunit gamma	Phosphatidylinositol 3-kinase regulatory subunit gamma	encountered in both interactomes
Q92851	47	35	Caspase-10	Caspase-10	encountered in both interactomes
Q99708	47	26	DNA endonuclease RBBP8	DNA endonuclease RBBP8	encountered in both interactomes
Q9BXS5	47	17	AP-1 complex subunit mu-1	AP-1 complex subunit mu-1	encountered in both interactomes
Q9BZW7	47	4	Testis-specific gene 10 protein	Testis-specific gene 10 protein	encountered in both interactomes
Q9H5I1	47	16	Histone-lysine N-methyltransferase SUV39H2	Histone-lysine N-methyltransferase SUV39H2	encountered in both interactomes
Q9NPI1	47	41	Bromodomain-containing protein 7	Bromodomain-containing protein 7	encountered in both interactomes
Q9NS56	47	41	E3 ubiquitin-protein ligase Topors	E3 ubiquitin-protein ligase Topors	encountered in both interactomes
Q9UK53	47	46	Inhibitor of growth protein 1	Inhibitor of growth protein 1	encountered in both interactomes
Q9UKV0	47	47	Histone deacetylase 9	Histone deacetylase 9	encountered in both interactomes
Q9Y6D9	47	23	Mitotic spindle assembly checkpoint protein MAD1	Mitotic spindle assembly checkpoint protein MAD1	encountered in both interactomes
O14933	46	34	Ubiquitin/ISG15-conjugating enzyme E2 L6	Ubiquitin/ISG15-conjugating enzyme E2 L6	encountered in both interactomes
O43186	46	15	Cone-rod homeobox protein	Cone-rod homeobox protein	encountered in both interactomes
O43464	46	18	Serine protease HTRA2, mitochondrial	Serine protease HTRA2, mitochondrial	encountered in both interactomes
O43524	46	42	Forkhead box protein O3	Forkhead box protein O3	encountered in both interactomes
O60264	46	34	SWI/SNF-related matrix-associated actin-dependent regulator of chromatin subfamily A member 5	SWI/SNF-related matrix-associated actin-dependent regulator of chromatin subfamily A member 5	encountered in both interactomes
O60383	46	46	Growth/differentiation factor 9	Growth/differentiation factor 9	encountered in both interactomes
O75554	46	45	WW domain-binding protein 4	WW domain-binding protein 4	encountered in both interactomes
O95817	46	19	BAG family molecular chaperone regulator 3	BAG family molecular chaperone regulator 3	encountered in both interactomes
P04083	46	40	Annexin A1	Annexin A1	encountered in both interactomes
P08727	46	23	Keratin, type I cytoskeletal 19	Keratin, type I cytoskeletal 19	encountered in both interactomes
P10398	46	35	Serine/threonine-protein kinase A-Raf	Serine/threonine-protein kinase A-Raf	encountered in both interactomes
P17275	46	31	Transcription factor jun-B	Transcription factor jun-B	encountered in both interactomes
P49848	46	39	Transcription initiation factor TFIID subunit 6	Transcription initiation factor TFIID subunit 6	encountered in both interactomes
P51572	46	18	B-cell receptor-associated protein 31	B-cell receptor-associated protein 31	encountered in both interactomes
P51681	46	42	C-C chemokine receptor type 5	C-C chemokine receptor type 5	encountered in both interactomes
P52333	46	39	Tyrosine-protein kinase JAK3	Tyrosine-protein kinase JAK3	encountered in both interactomes
P55212	46	38	Caspase-6	Caspase-6	encountered in both interactomes
Q14161	46	11	ARF GTPase-activating protein GIT2	ARF GTPase-activating protein GIT2	encountered in both interactomes
Q15560	46	19	Transcription elongation factor A protein 2	Transcription elongation factor A protein 2	encountered in both interactomes
Q15717	46	20	ELAV-like protein 1	ELAV-like protein 1	encountered in both interactomes
Q4VCS5	46	7	Angiomotin	Angiomotin	encountered in both interactomes
Q5JY77	46	46	G-protein coupled receptor-associated sorting protein 1	G-protein coupled receptor-associated sorting protein 1	encountered in both interactomes
Q8WYH8	46	30	Inhibitor of growth protein 5	Inhibitor of growth protein 5	encountered in both interactomes
Q99741	46	34	Cell division control protein 6 homolog	Cell division control protein 6 homolog	encountered in both interactomes
Q99972	46	38	Myocilin	Myocilin	encountered in both interactomes
Q9C035	46	18	Tripartite motif-containing protein 5	Tripartite motif-containing protein 5	encountered in both interactomes
Q9H8V3	46	13	Protein ECT2	Protein ECT2	encountered in both interactomes
Q9Y4B6	46	12	Protein VPRBP	Protein VPRBP	encountered in both interactomes
Q9Y6K1	46	26	DNA (cytosine-5)-methyltransferase 3A	DNA (cytosine-5)-methyltransferase 3A	encountered in both interactomes
O60216	45	20	Double-strand-break repair protein rad21 homolog	Double-strand-break repair protein rad21 homolog	encountered in both interactomes
O60885	45	33	Bromodomain-containing protein 4	Bromodomain-containing protein 4	encountered in both interactomes
O75815	45	42	Breast cancer anti-estrogen resistance protein 3	Breast cancer anti-estrogen resistance protein 3	encountered in both interactomes
O95163	45	32	Elongator complex protein 1	Elongator complex protein 1	encountered in both interactomes
O95405	45	37	Zinc finger FYVE domain-containing protein 9	Zinc finger FYVE domain-containing protein 9	encountered in both interactomes
O95782	45	31	AP-2 complex subunit alpha-1	AP-2 complex subunit alpha-1	encountered in both interactomes
P02452	45	35	Collagen alpha-1(I) chain	Collagen alpha-1(I) chain	encountered in both interactomes
P04004	45	30	Vitronectin	Vitronectin	encountered in both interactomes
P06454	45	34	Prothymosin alpha	Prothymosin alpha [Cleaved into: Thymosin alpha-1]	encountered in both interactomes
P14672	45	38	Solute carrier family 2, facilitated glucose transporter member 4	Solute carrier family 2, facilitated glucose transporter member 4	encountered in both interactomes
P15622	45	15	Zinc finger protein 250	Zinc finger protein 250	encountered in both interactomes
P17987	45	38	T-complex protein 1 subunit alpha	T-complex protein 1 subunit alpha	encountered in both interactomes
P20618	45	29	Proteasome subunit beta type-1	Proteasome subunit beta type-1	encountered in both interactomes
P25685	45	25	DnaJ homolog subfamily B member 1	DnaJ homolog subfamily B member 1	encountered in both interactomes
P27540	45	39	Aryl hydrocarbon receptor nuclear translocator	Aryl hydrocarbon receptor nuclear translocator	encountered in both interactomes
P28074	45	27	Proteasome subunit beta type-5	Proteasome subunit beta type-5	encountered in both interactomes
P52597	45	18	Heterogeneous nuclear ribonucleoprotein F	Heterogeneous nuclear ribonucleoprotein F	encountered in both interactomes
P52701	45	30	DNA mismatch repair protein Msh6	DNA mismatch repair protein Msh6	encountered in both interactomes
P55196	45	40	Afadin	Afadin	encountered in both interactomes
P55209	45	32	Nucleosome assembly protein 1-like 1	Nucleosome assembly protein 1-like 1	encountered in both interactomes
P61073	45	36	C-X-C chemokine receptor type 4	C-X-C chemokine receptor type 4	encountered in both interactomes
P63092	45	36	Guanine nucleotide-binding protein G(s) subunit alpha isoforms short	Guanine nucleotide-binding protein G(s) subunit alpha isoforms short	encountered in both interactomes
Q03001	45	29	Dystonin	Dystonin	encountered in both interactomes
Q03933	45	13	Heat shock factor protein 2	Heat shock factor protein 2	encountered in both interactomes
Q13094	45	38	Lymphocyte cytosolic protein 2	Lymphocyte cytosolic protein 2	encountered in both interactomes
Q13438	45	13	Protein OS-9	Protein OS-9	encountered in both interactomes
Q13976	45	30	cGMP-dependent protein kinase 1	cGMP-dependent protein kinase 1	encountered in both interactomes
Q16254	45	35	Transcription factor E2F4	Transcription factor E2F4	encountered in both interactomes
Q5JWF2	45	31	Guanine nucleotide-binding protein G(s) subunit alpha isoforms XLas	Guanine nucleotide-binding protein G(s) subunit alpha isoforms XLas	encountered in both interactomes
Q86Y13	45	27	E3 ubiquitin-protein ligase DZIP3	E3 ubiquitin-protein ligase DZIP3	encountered in both interactomes
Q96MT8	45	26	Centrosomal protein of 63 kDa	Centrosomal protein of 63 kDa	encountered in both interactomes
Q9H0A6	45	2	RING finger protein 32	RING finger protein 32	encountered in both interactomes
Q9NQC3	45	36	Reticulon-4	Reticulon-4	encountered in both interactomes
Q9NX04	45	4	Uncharacterized protein C1orf109	Uncharacterized protein C1orf109	encountered in both interactomes
Q9UBF6	45	23	RING-box protein 2	RING-box protein 2	encountered in both interactomes
Q9UJY5	45	27	ADP-ribosylation factor-binding protein GGA1	ADP-ribosylation factor-binding protein GGA1	encountered in both interactomes
Q9Y4H2	45	42	Insulin receptor substrate 2	Insulin receptor substrate 2	encountered in both interactomes
O00303	44	31	Eukaryotic translation initiation factor 3 subunit F	Eukaryotic translation initiation factor 3 subunit F	encountered in both interactomes
O43521	44	26	Bcl-2-like protein 11	Bcl-2-like protein 11	encountered in both interactomes
O95630	44	27	STAM-binding protein	STAM-binding protein	encountered in both interactomes
P02786	44	20	Transferrin receptor protein 1	Transferrin receptor protein 1	encountered in both interactomes
P07996	44	43	Thrombospondin-1	Thrombospondin-1	encountered in both interactomes
P08865	44	14	40S ribosomal protein SA	40S ribosomal protein SA	encountered in both interactomes
P10244	44	35	Myb-related protein B	Myb-related protein B	encountered in both interactomes
P10912	44	33	Growth hormone receptor	Growth hormone receptor	encountered in both interactomes
P11309	44	21	Serine/threonine-protein kinase pim-1	Serine/threonine-protein kinase pim-1	encountered in both interactomes
P14866	44	34	Heterogeneous nuclear ribonucleoprotein L	Heterogeneous nuclear ribonucleoprotein L	encountered in both interactomes
P20823	44	31	Hepatocyte nuclear factor 1-alpha	Hepatocyte nuclear factor 1-alpha	encountered in both interactomes
P27448	44	37	MAP/microtubule affinity-regulating kinase 3	MAP/microtubule affinity-regulating kinase 3	encountered in both interactomes
P30281	44	31	G1/S-specific cyclin-D3	G1/S-specific cyclin-D3	encountered in both interactomes
P35227	44	23	Polycomb group RING finger protein 2	Polycomb group RING finger protein 2	encountered in both interactomes
P35269	44	36	General transcription factor IIF subunit 1	General transcription factor IIF subunit 1	encountered in both interactomes
P38159	44	21	RNA-binding motif protein, X chromosome	Heterogeneous nuclear ribonucleoprotein G	encountered in both interactomes
P45985	44	29	Dual specificity mitogen-activated protein kinase kinase 4	Dual specificity mitogen-activated protein kinase kinase 4	encountered in both interactomes
P47897	44	32	Glutamine--tRNA ligase	Glutaminyl-tRNA synthetase	encountered in both interactomes
P51946	44	22	Cyclin-H	Cyclin-H	encountered in both interactomes
P60510	44	57	Serine/threonine-protein phosphatase 4 catalytic subunit	Serine/threonine-protein phosphatase 4 catalytic subunit	encountered in both interactomes
P61769	44	27	Beta-2-microglobulin	Beta-2-microglobulin [Cleaved into: Beta-2-microglobulin form pI 5.3]	encountered in both interactomes
Q01780	44	41	Exosome component 10	Exosome component 10	encountered in both interactomes
Q08209	44	29	Serine/threonine-protein phosphatase 2B catalytic subunit alpha isoform	Serine/threonine-protein phosphatase 2B catalytic subunit alpha isoform	encountered in both interactomes
Q12913	44	16	Receptor-type tyrosine-protein phosphatase eta	Receptor-type tyrosine-protein phosphatase eta	encountered in both interactomes
Q13148	44	15	TAR DNA-binding protein 43	TAR DNA-binding protein 43	encountered in both interactomes
Q14241	44	13	Transcription elongation factor B polypeptide 3	Transcription elongation factor B polypeptide 3	encountered in both interactomes
Q6NUQ1	44	9	RAD50-interacting protein 1	RAD50-interacting protein 1	encountered in both interactomes
Q7Z6E9	44	36	E3 ubiquitin-protein ligase RBBP6	E3 ubiquitin-protein ligase RBBP6	encountered in both interactomes
Q8WYA6	44	20	Beta-catenin-like protein 1	Beta-catenin-like protein 1	encountered in both interactomes
Q96EP0	44	10	E3 ubiquitin-protein ligase RNF31	RING finger protein 31	encountered in both interactomes
Q99623	44	54	Prohibitin-2	Prohibitin-2	encountered in both interactomes
Q9BVJ6	44	41	U3 small nucleolar RNA-associated protein 14 homolog A	U3 small nucleolar RNA-associated protein 14 homolog A	encountered in both interactomes
Q9BWG6	44	3	Sodium channel modifier 1	Sodium channel modifier 1	encountered in both interactomes
Q9H788	44	6	SH2 domain-containing protein 4A	SH2 domain-containing protein 4A	encountered in both interactomes
Q9UNS2	44	29	COP9 signalosome complex subunit 3	COP9 signalosome complex subunit 3	encountered in both interactomes
Q9Y3F4	44	42	Serine-threonine kinase receptor-associated protein	Serine-threonine kinase receptor-associated protein	encountered in both interactomes
Q9Y3R0	44	39	Glutamate receptor-interacting protein 1	Glutamate receptor-interacting protein 1	encountered in both interactomes
A1L4K1	43		Fibronectin type III and SPRY domain-containing protein 2	Fibronectin type III and SPRY domain-containing protein 2	encountered only in PICKLE 2.0	common in RHCP
O60506	43	36	Heterogeneous nuclear ribonucleoprotein Q	Heterogeneous nuclear ribonucleoprotein Q	encountered in both interactomes
O75182	43	37	Paired amphipathic helix protein Sin3b	Paired amphipathic helix protein Sin3b	encountered in both interactomes
O76015	43	1	Keratin, type I cuticular Ha8	Keratin, type I cuticular Ha8	encountered in both interactomes
O95568	43	4	Histidine protein methyltransferase 1 homolog	Histidine protein methyltransferase 1 homolog	encountered in both interactomes
P02647	43	29	Apolipoprotein A-I	Apolipoprotein A-I	encountered in both interactomes
P05161	43	17	Ubiquitin-like protein ISG15	Ubiquitin-like protein ISG15	encountered in both interactomes
P11474	43	33	Steroid hormone receptor ERR1	Steroid hormone receptor ERR1	encountered in both interactomes
P13646	43	2	Keratin, type I cytoskeletal 13	Keratin, type I cytoskeletal 13	encountered in both interactomes
P13861	43	42	cAMP-dependent protein kinase type II-alpha regulatory subunit	cAMP-dependent protein kinase type II-alpha regulatory subunit	encountered in both interactomes
P16403	43	24	Histone H1.2	Histone H1.2	encountered in both interactomes
P23396	43	27	40S ribosomal protein S3	40S ribosomal protein S3	encountered in both interactomes
P23511	43	31	Nuclear transcription factor Y subunit alpha	Nuclear transcription factor Y subunit alpha	encountered in both interactomes
P23769	43	26	Endothelial transcription factor GATA-2	Endothelial transcription factor GATA-2	encountered in both interactomes
P25789	43	19	Proteasome subunit alpha type-4	Proteasome subunit alpha type-4	encountered in both interactomes
P49959	43	35	Double-strand break repair protein MRE11A	Double-strand break repair protein MRE11A	encountered in both interactomes
P50552	43	34	Vasodilator-stimulated phosphoprotein	Vasodilator-stimulated phosphoprotein	encountered in both interactomes
P51812	43	33	Ribosomal protein S6 kinase alpha-3	Ribosomal protein S6 kinase alpha-3	encountered in both interactomes
P55040	43	16	GTP-binding protein GEM	GTP-binding protein GEM	encountered in both interactomes
P57678	43	39	Gem-associated protein 4	Gem-associated protein 4	encountered in both interactomes
P60604	43	21	Ubiquitin-conjugating enzyme E2 G2	Ubiquitin-conjugating enzyme E2 G2	encountered in both interactomes
P62491	43	29	Ras-related protein Rab-11A	Ras-related protein Rab-11A	encountered in both interactomes
Q01850	43	3	Cerebellar degeneration-related protein 2	Cerebellar degeneration-related protein 2	encountered in both interactomes
Q03181	43	31	Peroxisome proliferator-activated receptor delta	Peroxisome proliferator-activated receptor delta	encountered in both interactomes
Q13257	43	31	Mitotic spindle assembly checkpoint protein MAD2A	Mitotic spindle assembly checkpoint protein MAD2A	encountered in both interactomes
Q14134	43	38	Tripartite motif-containing protein 29	Tripartite motif-containing protein 29	encountered in both interactomes
Q15700	43	42	Disks large homolog 2	Disks large homolog 2	encountered in both interactomes
Q2TAC2	43		Coiled-coil domain-containing protein 57	Coiled-coil domain-containing protein 57	encountered only in PICKLE 2.0	common in RHCP
Q68E01	43	33	Integrator complex subunit 3	Integrator complex subunit 3	encountered in both interactomes
Q6UWE0	43	29	E3 ubiquitin-protein ligase LRSAM1	E3 ubiquitin-protein ligase LRSAM1	encountered in both interactomes
Q86UW9	43	22	Probable E3 ubiquitin-protein ligase DTX2	Protein deltex-2	encountered in both interactomes
Q92796	43	53	Disks large homolog 3	Disks large homolog 3	encountered in both interactomes
Q96SQ5	43	1	Zinc finger protein 587	Zinc finger protein 587	encountered in both interactomes
Q99460	43	30	26S proteasome non-ATPase regulatory subunit 1	26S proteasome non-ATPase regulatory subunit 1	encountered in both interactomes
Q99471	43	17	Prefoldin subunit 5	Prefoldin subunit 5	encountered in both interactomes
Q99704	43	34	Docking protein 1	Docking protein 1	encountered in both interactomes
Q99942	43	27	E3 ubiquitin-protein ligase RNF5	E3 ubiquitin-protein ligase RNF5	encountered in both interactomes
Q9NR12	43	27	PDZ and LIM domain protein 7	PDZ and LIM domain protein 7	encountered in both interactomes
Q9NS91	43	20	E3 ubiquitin-protein ligase RAD18	E3 ubiquitin-protein ligase RAD18	encountered in both interactomes
Q9NVC6	43	36	Mediator of RNA polymerase II transcription subunit 17	Mediator of RNA polymerase II transcription subunit 17	encountered in both interactomes
Q9UHI6	43	42	Probable ATP-dependent RNA helicase DDX20	Probable ATP-dependent RNA helicase DDX20	encountered in both interactomes
Q9UIM3	43	1	FK506-binding protein-like	FK506-binding protein-like	encountered in both interactomes
Q9UMN6	43	29	Histone-lysine N-methyltransferase 2B	Histone-lysine N-methyltransferase MLL4	encountered in both interactomes
Q9UQB8	43	24	Brain-specific angiogenesis inhibitor 1-associated protein 2	Brain-specific angiogenesis inhibitor 1-associated protein 2	encountered in both interactomes
O00221	42	48	NF-kappa-B inhibitor epsilon	NF-kappa-B inhibitor epsilon	encountered in both interactomes
O75886	42	23	Signal transducing adapter molecule 2	Signal transducing adapter molecule 2	encountered in both interactomes
O95786	42	18	Probable ATP-dependent RNA helicase DDX58	Probable ATP-dependent RNA helicase DDX58	encountered in both interactomes
O95863	42	22	Zinc finger protein SNAI1	Zinc finger protein SNAI1	encountered in both interactomes
P00734	42	39	Prothrombin	Prothrombin	encountered in both interactomes
P04439	42	27	HLA class I histocompatibility antigen, A-3 alpha chain	HLA class I histocompatibility antigen, A-3 alpha chain	encountered in both interactomes
P13693	42	25	Translationally-controlled tumor protein	Translationally-controlled tumor protein	encountered in both interactomes
P29323	42	42	Ephrin type-B receptor 2	Ephrin type-B receptor 2	encountered in both interactomes
P29972	42	9	Aquaporin-1	Aquaporin-1	encountered in both interactomes
P33991	42	37	DNA replication licensing factor MCM4	DNA replication licensing factor MCM4	encountered in both interactomes
P35869	42	35	Aryl hydrocarbon receptor	Aryl hydrocarbon receptor	encountered in both interactomes
P42680	42	33	Tyrosine-protein kinase Tec	Tyrosine-protein kinase Tec	encountered in both interactomes
P49137	42	26	MAP kinase-activated protein kinase 2	MAP kinase-activated protein kinase 2	encountered in both interactomes
P54278	42	41	Mismatch repair endonuclease PMS2	Mismatch repair endonuclease PMS2	encountered in both interactomes
Q02535	42	39	DNA-binding protein inhibitor ID-3	DNA-binding protein inhibitor ID-3	encountered in both interactomes
Q04637	42	35	Eukaryotic translation initiation factor 4 gamma 1	Eukaryotic translation initiation factor 4 gamma 1	encountered in both interactomes
Q13509	42	24	Tubulin beta-3 chain	Tubulin beta-3 chain	encountered in both interactomes
Q14155	42	29	Rho guanine nucleotide exchange factor 7	Rho guanine nucleotide exchange factor 7	encountered in both interactomes
Q14643	42	37	Inositol 1,4,5-trisphosphate receptor type 1	Inositol 1,4,5-trisphosphate receptor type 1	encountered in both interactomes
Q15041	42	13	ADP-ribosylation factor-like protein 6-interacting protein 1	ADP-ribosylation factor-like protein 6-interacting protein 1	encountered in both interactomes
Q53G59	42	23	Kelch-like protein 12	Kelch-like protein 12	encountered in both interactomes
Q8WWW0	42	18	Ras association domain-containing protein 5	Ras association domain-containing protein 5	encountered in both interactomes
Q96EP1	42	23	E3 ubiquitin-protein ligase CHFR	E3 ubiquitin-protein ligase CHFR	encountered in both interactomes
Q96RU7	42	29	Tribbles homolog 3	Tribbles homolog 3	encountered in both interactomes
Q99996	42	22	A-kinase anchor protein 9	A-kinase anchor protein 9	encountered in both interactomes
Q9H190	42	16	Syntenin-2	Syntenin-2	encountered in both interactomes
Q9H7E9	42	33	UPF0488 protein C8orf33	UPF0488 protein C8orf33	encountered in both interactomes
Q9H832	42	27	Ubiquitin-conjugating enzyme E2 Z	Ubiquitin-conjugating enzyme E2 Z	encountered in both interactomes
Q9NZC7	42	30	WW domain-containing oxidoreductase	WW domain-containing oxidoreductase	encountered in both interactomes
Q9UIG0	42	41	Tyrosine-protein kinase BAZ1B	Tyrosine-protein kinase BAZ1B	encountered in both interactomes
Q9Y5S9	42	17	RNA-binding protein 8A	RNA-binding protein 8A	encountered in both interactomes
O15287	41	36	Fanconi anemia group G protein	Fanconi anemia group G protein	encountered in both interactomes
O60716	41	34	Catenin delta-1	Catenin delta-1	encountered in both interactomes
O75528	41	33	Transcriptional adapter 3	Transcriptional adapter 3	encountered in both interactomes
O75586	41	28	Mediator of RNA polymerase II transcription subunit 6	Mediator of RNA polymerase II transcription subunit 6	encountered in both interactomes
P01116	41	22	GTPase KRas	GTPase KRas	encountered in both interactomes
P15056	41	29	Serine/threonine-protein kinase B-raf	Serine/threonine-protein kinase B-raf	encountered in both interactomes
P22626	41	28	Heterogeneous nuclear ribonucleoproteins A2/B1	Heterogeneous nuclear ribonucleoproteins A2/B1	encountered in both interactomes
P23497	41	18	Nuclear autoantigen Sp-100	Nuclear autoantigen Sp-100	encountered in both interactomes
P28799	41	19	Granulins	Granulins	encountered in both interactomes
P30876	41	31	DNA-directed RNA polymerase II subunit RPB2	DNA-directed RNA polymerase II subunit RPB2	encountered in both interactomes
P31943	41	28	Heterogeneous nuclear ribonucleoprotein H	Heterogeneous nuclear ribonucleoprotein H	encountered in both interactomes
P42684	41	24	Abelson tyrosine-protein kinase 2	Abelson tyrosine-protein kinase 2	encountered in both interactomes
P49418	41	22	Amphiphysin	Amphiphysin	encountered in both interactomes
Q01081	41	14	Splicing factor U2AF 35 kDa subunit	Splicing factor U2AF 35 kDa subunit	encountered in both interactomes
Q12849	41	2	G-rich sequence factor 1	G-rich sequence factor 1	encountered in both interactomes
Q12962	41	31	Transcription initiation factor TFIID subunit 10	Transcription initiation factor TFIID subunit 10	encountered in both interactomes
Q13554	41	15	Calcium/calmodulin-dependent protein kinase type II subunit beta	Calcium/calmodulin-dependent protein kinase type II subunit beta	encountered in both interactomes
Q14344	41	34	Guanine nucleotide-binding protein subunit alpha-13	Guanine nucleotide-binding protein subunit alpha-13	encountered in both interactomes
Q15078	41	28	Cyclin-dependent kinase 5 activator 1	Cyclin-dependent kinase 5 activator 1	encountered in both interactomes
Q15650	41	39	Activating signal cointegrator 1	Activating signal cointegrator 1	encountered in both interactomes
Q7L590	41	32	Protein MCM10 homolog	Protein MCM10 homolog	encountered in both interactomes
Q92466	41	17	DNA damage-binding protein 2	DNA damage-binding protein 2	encountered in both interactomes
Q92985	41	28	Interferon regulatory factor 7	Interferon regulatory factor 7	encountered in both interactomes
Q96JB5	41	35	CDK5 regulatory subunit-associated protein 3	CDK5 regulatory subunit-associated protein 3	encountered in both interactomes
Q96R06	41	12	Sperm-associated antigen 5	Sperm-associated antigen 5	encountered in both interactomes
Q96T60	41	22	Bifunctional polynucleotide phosphatase/kinase	Bifunctional polynucleotide phosphatase/kinase	encountered in both interactomes
Q99832	41	34	T-complex protein 1 subunit eta	T-complex protein 1 subunit eta	encountered in both interactomes
Q9BXW4	41	2	Microtubule-associated proteins 1A/1B light chain 3C	Microtubule-associated proteins 1A/1B light chain 3C	encountered in both interactomes
Q9C0F1	41	8	Centrosomal protein of 44 kDa	Centrosomal protein of 44 kDa	encountered in both interactomes
Q9H1I8	41	37	Activating signal cointegrator 1 complex subunit 2	Activating signal cointegrator 1 complex subunit 2	encountered in both interactomes
Q9UBN6	41	48	Tumor necrosis factor receptor superfamily member 10D	Tumor necrosis factor receptor superfamily member 10D	encountered in both interactomes
Q9UL45	41	21	Biogenesis of lysosome-related organelles complex 1 subunit 6	Pallidin	encountered in both interactomes
Q9Y6I3	41	23	Epsin-1	Epsin-1	encountered in both interactomes
O00206	40	33	Toll-like receptor 4	Toll-like receptor 4	encountered in both interactomes
O15344	40	18	E3 ubiquitin-protein ligase Midline-1	Midline-1	encountered in both interactomes
O43561	40	29	Linker for activation of T-cells family member 1	Linker for activation of T-cells family member 1	encountered in both interactomes
O43829	40	2	Zinc finger and BTB domain-containing protein 14	Zinc finger protein 161 homolog	encountered in both interactomes
P07332	40	33	Tyrosine-protein kinase Fes/Fps	Tyrosine-protein kinase Fes/Fps	encountered in both interactomes
P19022	40	25	Cadherin-2	Cadherin-2	encountered in both interactomes
P19419	40	32	ETS domain-containing protein Elk-1	ETS domain-containing protein Elk-1	encountered in both interactomes
P26599	40	23	Polypyrimidine tract-binding protein 1	Polypyrimidine tract-binding protein 1	encountered in both interactomes
P35080	40	38	Profilin-2	Profilin-2	encountered in both interactomes
P35221	40	31	Catenin alpha-1	Catenin alpha-1	encountered in both interactomes
P35251	40	39	Replication factor C subunit 1	Replication factor C subunit 1	encountered in both interactomes
P43686	40	32	26S protease regulatory subunit 6B	26S protease regulatory subunit 6B	encountered in both interactomes
P46459	40	31	Vesicle-fusing ATPase	Vesicle-fusing ATPase	encountered in both interactomes
P46777	40	31	60S ribosomal protein L5	60S ribosomal protein L5	encountered in both interactomes
P53779	40	25	Mitogen-activated protein kinase 10	Mitogen-activated protein kinase 10	encountered in both interactomes
P54727	40	28	UV excision repair protein RAD23 homolog B	UV excision repair protein RAD23 homolog B	encountered in both interactomes
P60033	40	24	CD81 antigen	CD81 antigen	encountered in both interactomes
Q02930	40	5	Cyclic AMP-responsive element-binding protein 5	Cyclic AMP-responsive element-binding protein 5	encountered in both interactomes
Q03468	40	25	DNA excision repair protein ERCC-6	DNA excision repair protein ERCC-6	encountered in both interactomes
Q06830	40	25	Peroxiredoxin-1	Peroxiredoxin-1	encountered in both interactomes
Q07869	40	29	Peroxisome proliferator-activated receptor alpha	Peroxisome proliferator-activated receptor alpha	encountered in both interactomes
Q13133	40	26	Oxysterols receptor LXR-alpha	Oxysterols receptor LXR-alpha	encountered in both interactomes
Q13541	40	26	Eukaryotic translation initiation factor 4E-binding protein 1	Eukaryotic translation initiation factor 4E-binding protein 1	encountered in both interactomes
Q14191	40	35	Werner syndrome ATP-dependent helicase	Werner syndrome ATP-dependent helicase	encountered in both interactomes
Q14469	40	36	Transcription factor HES-1	Transcription factor HES-1	encountered in both interactomes
Q14980	40	22	Nuclear mitotic apparatus protein 1	Nuclear mitotic apparatus protein 1	encountered in both interactomes
Q15545	40	36	Transcription initiation factor TFIID subunit 7	Transcription initiation factor TFIID subunit 7	encountered in both interactomes
Q71SY5	40	39	Mediator of RNA polymerase II transcription subunit 25	Mediator of RNA polymerase II transcription subunit 25	encountered in both interactomes
Q7KZI7	40	18	Serine/threonine-protein kinase MARK2	Serine/threonine-protein kinase MARK2	encountered in both interactomes
Q8IZL8	40	32	Proline-, glutamic acid- and leucine-rich protein 1	Proline-, glutamic acid- and leucine-rich protein 1	encountered in both interactomes
Q92890	40	31	Ubiquitin fusion degradation protein 1 homolog	Ubiquitin fusion degradation protein 1 homolog	encountered in both interactomes
Q99933	40	28	BAG family molecular chaperone regulator 1	BAG family molecular chaperone regulator 1	encountered in both interactomes
Q9BQD3	40	28	KxDL motif-containing protein 1	UPF0459 protein C19orf50	encountered in both interactomes
Q9NWB1	40	23	RNA binding protein fox-1 homolog 1	RNA binding protein fox-1 homolog 1	encountered in both interactomes
Q9P0T4	40	8	Zinc finger protein 581	Zinc finger protein 581	encountered in both interactomes
Q9UBE8	40	24	Serine/threonine-protein kinase NLK	Serine/threonine-protein kinase NLK	encountered in both interactomes
Q9UHV2	40	16	SERTA domain-containing protein 1	SERTA domain-containing protein 1	encountered in both interactomes
Q9UHX1	40	55	Poly(U)-binding-splicing factor PUF60	Poly(U)-binding-splicing factor PUF60 (60 kDa poly(U)-binding-splicing factor)	encountered in both interactomes
Q9UJ41	40	15	Rab5 GDP/GTP exchange factor	Rab5 GDP/GTP exchange factor	encountered in both interactomes
Q9UJU2	40	29	Lymphoid enhancer-binding factor 1	Lymphoid enhancer-binding factor 1	encountered in both interactomes
Q9UL03	40	36	Integrator complex subunit 6	Integrator complex subunit 6	encountered in both interactomes
Q9ULH1	40	33	Arf-GAP with SH3 domain, ANK repeat and PH domain-containing protein 1	Arf-GAP with SH3 domain, ANK repeat and PH domain-containing protein 1	encountered in both interactomes
A7KAX9	39	29	Rho GTPase-activating protein 32	Rho GTPase-activating protein 32	encountered in both interactomes
O00161	39	35	Synaptosomal-associated protein 23	Synaptosomal-associated protein 23	encountered in both interactomes
O00410	39	22	Importin-5	Importin-5	encountered in both interactomes
O14733	39	27	Dual specificity mitogen-activated protein kinase kinase 7	Dual specificity mitogen-activated protein kinase kinase 7	encountered in both interactomes
O14775	39	22	Guanine nucleotide-binding protein subunit beta-5	Guanine nucleotide-binding protein subunit beta-5	encountered in both interactomes
O15160	39	12	DNA-directed RNA polymerases I and III subunit RPAC1	DNA-directed RNA polymerases I and III subunit RPAC1	encountered in both interactomes
O75643	39	27	U5 small nuclear ribonucleoprotein 200 kDa helicase	U5 small nuclear ribonucleoprotein 200 kDa helicase	encountered in both interactomes
O76081	39	25	Regulator of G-protein signaling 20	Regulator of G-protein signaling 20	encountered in both interactomes
P02794	39	20	Ferritin heavy chain	Ferritin heavy chain	encountered in both interactomes
P07737	39	30	Profilin-1	Profilin-1	encountered in both interactomes
P10599	39	32	Thioredoxin	Thioredoxin	encountered in both interactomes
P13196	39	12	5-aminolevulinate synthase, nonspecific, mitochondrial	5-aminolevulinate synthase, nonspecific, mitochondrial	encountered in both interactomes
P15941	39	27	Mucin-1	Mucin-1	encountered in both interactomes
P19447	39	25	TFIIH basal transcription factor complex helicase XPB subunit	TFIIH basal transcription factor complex helicase XPB subunit	encountered in both interactomes
P26651	39	23	Tristetraprolin	Tristetraprolin	encountered in both interactomes
P30307	39	30	M-phase inducer phosphatase 3	M-phase inducer phosphatase 3	encountered in both interactomes
P33176	39	37	Kinesin-1 heavy chain	Kinesin-1 heavy chain	encountered in both interactomes
P40189	39	34	Interleukin-6 receptor subunit beta	Interleukin-6 receptor subunit beta	encountered in both interactomes
P41279	39	36	Mitogen-activated protein kinase kinase kinase 8	Mitogen-activated protein kinase kinase kinase 8	encountered in both interactomes
P49116	39	20	Nuclear receptor subfamily 2 group C member 2	Nuclear receptor subfamily 2 group C member 2	encountered in both interactomes
P49368	39	30	T-complex protein 1 subunit gamma	T-complex protein 1 subunit gamma	encountered in both interactomes
P49711	39	24	Transcriptional repressor CTCF	Transcriptional repressor CTCF	encountered in both interactomes
P61024	39	11	Cyclin-dependent kinases regulatory subunit 1	Cyclin-dependent kinases regulatory subunit 1	encountered in both interactomes
P62701	39	13	40S ribosomal protein S4, X isoform	40S ribosomal protein S4, X isoform	encountered in both interactomes
Q04759	39	33	Protein kinase C theta type	Protein kinase C theta type	encountered in both interactomes
Q08881	39	32	Tyrosine-protein kinase ITK/TSK	Tyrosine-protein kinase ITK/TSK	encountered in both interactomes
Q12986	39	8	Transcriptional repressor NF-X1	Transcriptional repressor NF-X1	encountered in both interactomes
Q15311	39	24	RalA-binding protein 1	RalA-binding protein 1	encountered in both interactomes
Q15599	39	37	Na(+)/H(+) exchange regulatory cofactor NHE-RF2	Na(+)/H(+) exchange regulatory cofactor NHE-RF2	encountered in both interactomes
Q16643	39	23	Drebrin	Drebrin	encountered in both interactomes
Q6P2Q9	39	30	Pre-mRNA-processing-splicing factor 8	Pre-mRNA-processing-splicing factor 8	encountered in both interactomes
Q6P597	39	8	Kinesin light chain 3	Kinesin light chain 3	encountered in both interactomes
Q8N5A5	39	8	Zinc finger CCCH-type with G patch domain-containing protein	Zinc finger CCCH-type with G patch domain-containing protein	encountered in both interactomes
Q8NBB4	39	34	Zinc finger and SCAN domain-containing protein 1	Zinc finger and SCAN domain-containing protein 1	encountered in both interactomes
Q8NG27	39	14	E3 ubiquitin-protein ligase Praja-1	E3 ubiquitin-protein ligase Praja-1	encountered in both interactomes
Q8WXE1	39	20	ATR-interacting protein	ATR-interacting protein	encountered in both interactomes
Q96G25	39	35	Mediator of RNA polymerase II transcription subunit 8	Mediator of RNA polymerase II transcription subunit 8	encountered in both interactomes
Q96HT8	39	7	MORF4 family-associated protein 1-like 1	MORF4 family-associated protein 1-like 1	encountered in both interactomes
Q99757	39	1	Thioredoxin, mitochondrial	Thioredoxin, mitochondrial	encountered in both interactomes
Q9BQG0	39	32	Myb-binding protein 1A	Myb-binding protein 1A	encountered in both interactomes
Q9BT78	39	25	COP9 signalosome complex subunit 4	COP9 signalosome complex subunit 4	encountered in both interactomes
Q9H9D4	39	31	Zinc finger protein 408	Zinc finger protein 408	encountered in both interactomes
Q9HCU9	39	22	Breast cancer metastasis-suppressor 1	Breast cancer metastasis-suppressor 1	encountered in both interactomes
Q9NV56	39	37	MRG/MORF4L-binding protein	MRG-binding protein	encountered in both interactomes
Q9Y2H9	39	4	Microtubule-associated serine/threonine-protein kinase 1	Microtubule-associated serine/threonine-protein kinase 1	encountered in both interactomes
O00165	38	20	HCLS1-associated protein X-1	HCLS1-associated protein X-1	encountered in both interactomes
O15392	38	31	Baculoviral IAP repeat-containing protein 5	Baculoviral IAP repeat-containing protein 5	encountered in both interactomes
O43395	38	19	U4/U6 small nuclear ribonucleoprotein Prp3	U4/U6 small nuclear ribonucleoprotein Prp3	encountered in both interactomes
P07196	38	20	Neurofilament light polypeptide	Neurofilament light polypeptide	encountered in both interactomes
P09471	38	35	Guanine nucleotide-binding protein G(o) subunit alpha	Guanine nucleotide-binding protein G	encountered in both interactomes
P0C1Z6	38	23	TCF3 fusion partner	TCF3 fusion partner	encountered in both interactomes
P10914	38	27	Interferon regulatory factor 1	Interferon regulatory factor 1	encountered in both interactomes
P11233	38	34	Ras-related protein Ral-A	Ras-related protein Ral-A	encountered in both interactomes
P14780	38	33	Matrix metalloproteinase-9	Matrix metalloproteinase-9	encountered in both interactomes
P15173	38	19	Myogenin	Myogenin	encountered in both interactomes
P21579	38	36	Synaptotagmin-1	Synaptotagmin-1	encountered in both interactomes
P21731	38	13	Thromboxane A2 receptor	Thromboxane A2 receptor	encountered in both interactomes
P28065	38	8	Proteasome subunit beta type-9	Proteasome subunit beta type-9	encountered in both interactomes
P28340	38	27	DNA polymerase delta catalytic subunit	DNA polymerase delta catalytic subunit	encountered in both interactomes
P32242	38	9	Homeobox protein OTX1	Homeobox protein OTX1	encountered in both interactomes
P48643	38	36	T-complex protein 1 subunit epsilon	T-complex protein 1 subunit epsilon	encountered in both interactomes
P48730	38	21	Casein kinase I isoform delta	Casein kinase I isoform delta	encountered in both interactomes
P49662	38	55	Caspase-4	Caspase-4	encountered in both interactomes
P49760	38	11	Dual specificity protein kinase CLK2	Dual specificity protein kinase CLK2	encountered in both interactomes
P49840	38	24	Glycogen synthase kinase-3 alpha	Glycogen synthase kinase-3 alpha	encountered in both interactomes
P51813	38	22	Cytoplasmic tyrosine-protein kinase BMX	Cytoplasmic tyrosine-protein kinase BMX	encountered in both interactomes
P61224	38	29	Ras-related protein Rap-1b	Ras-related protein Rap-1b	encountered in both interactomes
P62333	38	27	26S protease regulatory subunit 10B	26S protease regulatory subunit 10B	encountered in both interactomes
P62913	38	19	60S ribosomal protein L11	60S ribosomal protein L11	encountered in both interactomes
Q02246	38	30	Contactin-2	Contactin-2	encountered in both interactomes
Q09161	38	18	Nuclear cap-binding protein subunit 1	Nuclear cap-binding protein subunit 1	encountered in both interactomes
Q13042	38	23	Cell division cycle protein 16 homolog	Cell division cycle protein 16 homolog	encountered in both interactomes
Q13322	38	30	Growth factor receptor-bound protein 10	Growth factor receptor-bound protein 10	encountered in both interactomes
Q14847	38	13	LIM and SH3 domain protein 1	LIM and SH3 domain protein 1	encountered in both interactomes
Q15029	38	30	116 kDa U5 small nuclear ribonucleoprotein component	116 kDa U5 small nuclear ribonucleoprotein component	encountered in both interactomes
Q16620	38	29	BDNF/NT-3 growth factors receptor	BDNF/NT-3 growth factors receptor	encountered in both interactomes
Q5T200	38	35	Zinc finger CCCH domain-containing protein 13	Zinc finger CCCH domain-containing protein 13	encountered in both interactomes
Q5VTR2	38	8	E3 ubiquitin-protein ligase BRE1A	E3 ubiquitin-protein ligase BRE1A	encountered in both interactomes
Q7Z3B3	38	22	KAT8 regulatory NSL complex subunit 1	MLL1/MLL complex subunit KIAA1267	encountered in both interactomes
Q8NC51	38	22	Plasminogen activator inhibitor 1 RNA-binding protein	Plasminogen activator inhibitor 1 RNA-binding protein	encountered in both interactomes
Q8WV28	38	19	B-cell linker protein	B-cell linker protein	encountered in both interactomes
Q969U6	38	16	F-box/WD repeat-containing protein 5	F-box/WD repeat-containing protein 5	encountered in both interactomes
Q96GN5	38	2	Cell division cycle-associated 7-like protein	Cell division cycle-associated 7-like protein	encountered in both interactomes
Q96RU2	38	4	Ubiquitin carboxyl-terminal hydrolase 28	Ubiquitin carboxyl-terminal hydrolase 28	encountered in both interactomes
Q9BWF3	38	5	RNA-binding protein 4	RNA-binding protein 4	encountered in both interactomes
Q9BY11	38	36	Protein kinase C and casein kinase substrate in neurons protein 1	Protein kinase C and casein kinase substrate in neurons protein 1	encountered in both interactomes
Q9GZR7	38	30	ATP-dependent RNA helicase DDX24	ATP-dependent RNA helicase DDX24	encountered in both interactomes
Q9H0H5	38	29	Rac GTPase-activating protein 1	Rac GTPase-activating protein 1	encountered in both interactomes
Q9HC29	38	7	Nucleotide-binding oligomerization domain-containing protein 2	Nucleotide-binding oligomerization domain-containing protein 2	encountered in both interactomes
Q9ULK4	38	34	Mediator of RNA polymerase II transcription subunit 23	Mediator of RNA polymerase II transcription subunit 23	encountered in both interactomes
Q9ULV8	38	18	E3 ubiquitin-protein ligase CBL-C	Signal transduction protein CBL-C	encountered in both interactomes
Q9Y678	38	28	Coatomer subunit gamma-1	Coatomer subunit gamma	encountered in both interactomes
A5D8V6	37	7	Vacuolar protein sorting-associated protein 37C	Vacuolar protein sorting-associated protein 37C	encountered in both interactomes
O14654	37	29	Insulin receptor substrate 4	Insulin receptor substrate 4	encountered in both interactomes
O75190	37	13	DnaJ homolog subfamily B member 6	DnaJ homolog subfamily B member 6	encountered in both interactomes
O75446	37	35	Histone deacetylase complex subunit SAP30	Histone deacetylase complex subunit SAP30	encountered in both interactomes
O75448	37	33	Mediator of RNA polymerase II transcription subunit 24	Mediator of RNA polymerase II transcription subunit 24	encountered in both interactomes
O75469	37	18	Nuclear receptor subfamily 1 group I member 2	Nuclear receptor subfamily 1 group I member 2	encountered in both interactomes
O75791	37	32	GRB2-related adapter protein 2	GRB2-related adapter protein 2	encountered in both interactomes
O94875	37	24	Sorbin and SH3 domain-containing protein 2	Sorbin and SH3 domain-containing protein 2	encountered in both interactomes
P04075	37	21	Fructose-bisphosphate aldolase A	Fructose-bisphosphate aldolase A	encountered in both interactomes
P04179	37	37	Superoxide dismutase "Mn", mitochondrial	Superoxide dismutase [Mn], mitochondrial	encountered in both interactomes
P05386	37	34	60S acidic ribosomal protein P1	60S acidic ribosomal protein P1	encountered in both interactomes
P06396	37	34	Gelsolin	Gelsolin	encountered in both interactomes
P07237	37	35	Protein disulfide-isomerase	Protein disulfide-isomerase	encountered in both interactomes
P07858	37	30	Cathepsin B	Cathepsin B	encountered in both interactomes
P11532	37	27	Dystrophin	Dystrophin	encountered in both interactomes
P16234	37	29	Platelet-derived growth factor receptor alpha	Platelet-derived growth factor receptor alpha	encountered in both interactomes
P17535	37	32	Transcription factor jun-D	Transcription factor jun-D	encountered in both interactomes
P23142	37	20	Fibulin-1	Fibulin-1	encountered in both interactomes
P25800	37	7	Rhombotin-1	Rhombotin-1	encountered in both interactomes
P26367	37	30	Paired box protein Pax-6	Paired box protein Pax-6	encountered in both interactomes
P28070	37	14	Proteasome subunit beta type-4	Proteasome subunit beta type-4	encountered in both interactomes
P30086	37	31	Phosphatidylethanolamine-binding protein 1	Phosphatidylethanolamine-binding protein 1	encountered in both interactomes
P30504	37	37	HLA class I histocompatibility antigen, Cw-4 alpha chain	HLA class I histocompatibility antigen, Cw-4 alpha chain	encountered in both interactomes
P30519	37	33	Heme oxygenase 2	Heme oxygenase 2	encountered in both interactomes
P35240	37	32	Merlin	Merlin	encountered in both interactomes
P40855	37	21	Peroxisomal biogenesis factor 19	Peroxisomal biogenesis factor 19	encountered in both interactomes
P42568	37	34	Protein AF-9	Protein AF-9	encountered in both interactomes
P46821	37	29	Microtubule-associated protein 1B	Microtubule-associated protein 1B	encountered in both interactomes
P51608	37	29	Methyl-CpG-binding protein 2	Methyl-CpG-binding protein 2	encountered in both interactomes
P61247	37	42	40S ribosomal protein S3a	40S ribosomal protein S3a	encountered in both interactomes
P63151	37	37	Serine/threonine-protein phosphatase 2A 55 kDa regulatory subunit B alpha isoform	Serine/threonine-protein phosphatase 2A 55 kDa regulatory subunit B alpha isoform	encountered in both interactomes
P78395	37	1	Melanoma antigen preferentially expressed in tumors	Melanoma antigen preferentially expressed in tumors	encountered in both interactomes
P99999	37	37	Cytochrome c	Cytochrome c	encountered in both interactomes
Q00597	37	33	Fanconi anemia group C protein	Fanconi anemia group C protein	encountered in both interactomes
Q06323	37	21	Proteasome activator complex subunit 1	Proteasome activator complex subunit 1	encountered in both interactomes
Q13416	37	33	Origin recognition complex subunit 2	Origin recognition complex subunit 2	encountered in both interactomes
Q13569	37	30	G/T mismatch-specific thymine DNA glycosylase	G/T mismatch-specific thymine DNA glycosylase	encountered in both interactomes
Q13838	37	23	Spliceosome RNA helicase DDX39B	Spliceosome RNA helicase DDX39B	encountered in both interactomes
Q15075	37	24	Early endosome antigen 1	Early endosome antigen 1	encountered in both interactomes
Q15102	37	35	Platelet-activating factor acetylhydrolase IB subunit gamma	Platelet-activating factor acetylhydrolase IB subunit gamma	encountered in both interactomes
Q15366	37	12	Poly(rC)-binding protein 2	Poly(rC)-binding protein 2	encountered in both interactomes
Q16584	37	26	Mitogen-activated protein kinase kinase kinase 11	Mitogen-activated protein kinase kinase kinase 11	encountered in both interactomes
Q6NYC8	37	2	Phostensin	Phostensin	encountered in both interactomes
Q86V81	37	14	THO complex subunit 4	THO complex subunit 4	encountered in both interactomes
Q8N3Y1	37	14	F-box/WD repeat-containing protein 8	F-box/WD repeat-containing protein 8	encountered in both interactomes
Q8N8B7	37	10	Transcription elongation factor A N-terminal and central domain-containing protein	Transcription elongation factor A N-terminal and central domain-containing protein	encountered in both interactomes
Q92734	37	17	Protein TFG	Protein TFG	encountered in both interactomes
Q96CN9	37	15	GRIP and coiled-coil domain-containing protein 1	GRIP and coiled-coil domain-containing protein 1	encountered in both interactomes
Q9BT49	37	15	THAP domain-containing protein 7	THAP domain-containing protein 7	encountered in both interactomes
Q9BTT4	37	36	Mediator of RNA polymerase II transcription subunit 10	Mediator of RNA polymerase II transcription subunit 10	encountered in both interactomes
Q9BXW9	37	33	Fanconi anemia group D2 protein	Fanconi anemia group D2 protein	encountered in both interactomes
Q9NPF5	37	34	DNA methyltransferase 1-associated protein 1	DNA methyltransferase 1-associated protein 1	encountered in both interactomes
Q9NR30	37	28	Nucleolar RNA helicase 2	Nucleolar RNA helicase 2	encountered in both interactomes
Q9NYG5	37	15	Anaphase-promoting complex subunit 11	Anaphase-promoting complex subunit 11	encountered in both interactomes
Q9NZ52	37	24	ADP-ribosylation factor-binding protein GGA3	ADP-ribosylation factor-binding protein GGA3	encountered in both interactomes
Q9NZD8	37	13	Maspardin	Maspardin	encountered in both interactomes
Q9P2A4	37	20	ABI gene family member 3	ABI gene family member 3	encountered in both interactomes
Q9UJY4	37	24	ADP-ribosylation factor-binding protein GGA2	ADP-ribosylation factor-binding protein GGA2	encountered in both interactomes
Q9UKL0	37	34	REST corepressor 1	REST corepressor 1	encountered in both interactomes
O00505	36	17	Importin subunit alpha-4	Importin subunit alpha-3	encountered in both interactomes
O00716	36	23	Transcription factor E2F3	Transcription factor E2F3	encountered in both interactomes
O14908	36	45	PDZ domain-containing protein GIPC1	PDZ domain-containing protein GIPC1	encountered in both interactomes
O60763	36	27	General vesicular transport factor p115	General vesicular transport factor p115	encountered in both interactomes
O95989	36	36	Diphosphoinositol polyphosphate phosphohydrolase 1	Diphosphoinositol polyphosphate phosphohydrolase 1	encountered in both interactomes
P06756	36	27	Integrin alpha-V	Integrin alpha-V	encountered in both interactomes
P08253	36	32	72 kDa type IV collagenase	72 kDa type IV collagenase	encountered in both interactomes
P08648	36	26	Integrin alpha-5	Integrin alpha-5	encountered in both interactomes
P09234	36	7	U1 small nuclear ribonucleoprotein C	U1 small nuclear ribonucleoprotein C	encountered in both interactomes
P18206	36	28	Vinculin	Vinculin	encountered in both interactomes
P20338	36	27	Ras-related protein Rab-4A	Ras-related protein Rab-4A	encountered in both interactomes
P22415	36	37	Upstream stimulatory factor 1	Upstream stimulatory factor 1	encountered in both interactomes
P29475	36	34	Nitric oxide synthase, brain	Nitric oxide synthase, brain	encountered in both interactomes
P30154	36	47	Serine/threonine-protein phosphatase 2A 65 kDa regulatory subunit A beta isoform	Serine/threonine-protein phosphatase 2A 65 kDa regulatory subunit A beta isoform	encountered in both interactomes
P34931	36	32	Heat shock 70 kDa protein 1-like	Heat shock 70 kDa protein 1-like	encountered in both interactomes
P36894	36	23	Bone morphogenetic protein receptor type-1A	Bone morphogenetic protein receptor type-1A	encountered in both interactomes
P51149	36	33	Ras-related protein Rab-7a	Ras-related protein Rab-7a	encountered in both interactomes
P60880	36	35	Synaptosomal-associated protein 25	Synaptosomal-associated protein 25	encountered in both interactomes
P61081	36	21	NEDD8-conjugating enzyme Ubc12	NEDD8-conjugating enzyme Ubc12	encountered in both interactomes
P62318	36	26	Small nuclear ribonucleoprotein Sm D3	Small nuclear ribonucleoprotein Sm D3	encountered in both interactomes
P62328	36	25	Thymosin beta-4	Thymosin beta-4	encountered in both interactomes
P62937	36	22	Peptidyl-prolyl cis-trans isomerase A	Peptidyl-prolyl cis-trans isomerase A	encountered in both interactomes
P78545	36	39	ETS-related transcription factor Elf-3	ETS-related transcription factor Elf-3	encountered in both interactomes
P98175	36	9	RNA-binding protein 10	RNA-binding protein 10	encountered in both interactomes
Q02078	36	26	Myocyte-specific enhancer factor 2A	Myocyte-specific enhancer factor 2A	encountered in both interactomes
Q06330	36	26	Recombining binding protein suppressor of hairless	Recombining binding protein suppressor of hairless	encountered in both interactomes
Q06413	36	32	Myocyte-specific enhancer factor 2C	Myocyte-specific enhancer factor 2C	encountered in both interactomes
Q13098	36	21	COP9 signalosome complex subunit 1	COP9 signalosome complex subunit 1	encountered in both interactomes
Q13162	36	18	Peroxiredoxin-4	Peroxiredoxin-4	encountered in both interactomes
Q13164	36	16	Mitogen-activated protein kinase 7	Mitogen-activated protein kinase 7	encountered in both interactomes
Q13227	36	24	G protein pathway suppressor 2	G protein pathway suppressor 2	encountered in both interactomes
Q13444	36	28	Disintegrin and metalloproteinase domain-containing protein 15	Disintegrin and metalloproteinase domain-containing protein 15	encountered in both interactomes
Q13469	36	19	Nuclear factor of activated T-cells, cytoplasmic 2	Nuclear factor of activated T-cells, cytoplasmic 2	encountered in both interactomes
Q13557	36	16	Calcium/calmodulin-dependent protein kinase type II subunit delta	Calcium/calmodulin-dependent protein kinase type II subunit delta	encountered in both interactomes
Q14118	36	27	Dystroglycan	Dystroglycan	encountered in both interactomes
Q15139	36	28	Serine/threonine-protein kinase D1	Serine/threonine-protein kinase D1	encountered in both interactomes
Q15742	36	6	NGFI-A-binding protein 2	NGFI-A-binding protein 2	encountered in both interactomes
Q16186	36	25	Proteasomal ubiquitin receptor ADRM1	Proteasomal ubiquitin receptor ADRM1	encountered in both interactomes
Q5FBB7	36	25	Shugoshin-like 1	Shugoshin-like 1	encountered in both interactomes
Q5RKV6	36	32	Exosome complex component MTR3	Exosome complex component MTR3	encountered in both interactomes
Q8N163	36	33	Cell cycle and apoptosis regulator protein 2	Protein KIAA1967	encountered in both interactomes
Q8TDR0	36	27	TRAF3-interacting protein 1	TRAF3-interacting protein 1	encountered in both interactomes
Q92558	36	29	Wiskott-Aldrich syndrome protein family member 1	Wiskott-Aldrich syndrome protein family member 1	encountered in both interactomes
Q92878	36	33	DNA repair protein RAD50	DNA repair protein RAD50	encountered in both interactomes
Q96BZ8	36	4	Leukocyte receptor cluster member 1	Leukocyte receptor cluster member 1	encountered in both interactomes
Q96DC9	36	5	Ubiquitin thioesterase OTUB2	Ubiquitin thioesterase OTUB2	encountered in both interactomes
Q96ED9	36	26	Protein Hook homolog 2	Protein Hook homolog 2	encountered in both interactomes
Q96MU7	36	12	YTH domain-containing protein 1	YTH domain-containing protein 1	encountered in both interactomes
Q9C0C9	36	6	E2/E3 hybrid ubiquitin-protein ligase UBE2O	Ubiquitin-conjugating enzyme E2 O	encountered in both interactomes
Q9H0I2	36	17	Enkurin domain-containing protein 1	Uncharacterized protein C16orf48	encountered in both interactomes
Q9NW38	36	19	E3 ubiquitin-protein ligase FANCL	E3 ubiquitin-protein ligase FANCL	encountered in both interactomes
Q9NY61	36	23	Protein AATF	Protein AATF	encountered in both interactomes
Q9UKS6	36	34	Protein kinase C and casein kinase substrate in neurons protein 3	Protein kinase C and casein kinase substrate in neurons protein 3	encountered in both interactomes
Q9UQC2	36	30	GRB2-associated-binding protein 2	GRB2-associated-binding protein 2	encountered in both interactomes
O15399	35	32	Glutamate receptor ionotropic, NMDA 2D	Glutamate [NMDA] receptor subunit epsilon-4	encountered in both interactomes
O43167	35	4	Zinc finger and BTB domain-containing protein 24	Zinc finger and BTB domain-containing protein 24	encountered in both interactomes
O43294	35	25	Transforming growth factor beta-1-induced transcript 1 protein	Transforming growth factor beta-1-induced transcript 1 protein	encountered in both interactomes
O60907	35	23	F-box-like/WD repeat-containing protein TBL1X	F-box-like/WD repeat-containing protein TBL1X	encountered in both interactomes
P02458	35	30	Collagen alpha-1(II) chain	Collagen alpha-1(II) chain	encountered in both interactomes
P09769	35	25	Tyrosine-protein kinase Fgr	Tyrosine-protein kinase Fgr	encountered in both interactomes
P13631	35	22	Retinoic acid receptor gamma	Retinoic acid receptor gamma	encountered in both interactomes
P15822	35	8	Zinc finger protein 40	Zinc finger protein 40	encountered in both interactomes
P21802	35	17	Fibroblast growth factor receptor 2	Fibroblast growth factor receptor 2	encountered in both interactomes
P22460	35	6	Potassium voltage-gated channel subfamily A member 5	Potassium voltage-gated channel subfamily A member 5	encountered in both interactomes
P25942	35	43	Tumor necrosis factor receptor superfamily member 5	Tumor necrosis factor receptor superfamily member 5	encountered in both interactomes
P30450	35	5	HLA class I histocompatibility antigen, A-26 alpha chain	HLA class I histocompatibility antigen, A-26 alpha chain	encountered in both interactomes
P34741	35	30	Syndecan-2	Syndecan-2	encountered in both interactomes
P49459	35	17	Ubiquitin-conjugating enzyme E2 A	Ubiquitin-conjugating enzyme E2 A	encountered in both interactomes
P49720	35	25	Proteasome subunit beta type-3	Proteasome subunit beta type-3	encountered in both interactomes
P53355	35	29	Death-associated protein kinase 1	Death-associated protein kinase 1	encountered in both interactomes
P58753	35	26	Toll/interleukin-1 receptor domain-containing adapter protein	Toll/interleukin-1 receptor domain-containing adapter protein	encountered in both interactomes
P63162	35	25	Small nuclear ribonucleoprotein-associated protein N	Small nuclear ribonucleoprotein-associated protein N	encountered in both interactomes
Q01831	35	25	DNA repair protein complementing XP-C cells	DNA repair protein complementing XP-C cells	encountered in both interactomes
Q03113	35	31	Guanine nucleotide-binding protein subunit alpha-12	Guanine nucleotide-binding protein subunit alpha-12	encountered in both interactomes
Q13009	35	23	T-lymphoma invasion and metastasis-inducing protein 1	T-lymphoma invasion and metastasis-inducing protein 1	encountered in both interactomes
Q13190	35	27	Syntaxin-5	Syntaxin-5	encountered in both interactomes
Q13285	35	28	Steroidogenic factor 1	Steroidogenic factor 1	encountered in both interactomes
Q13368	35	19	MAGUK p55 subfamily member 3	MAGUK p55 subfamily member 3	encountered in both interactomes
Q13464	35	25	Rho-associated protein kinase 1	Rho-associated protein kinase 1	encountered in both interactomes
Q14258	35	24	E3 ubiquitin/ISG15 ligase TRIM25	E3 ubiquitin/ISG15 ligase TRIM25	encountered in both interactomes
Q15642	35	23	Cdc42-interacting protein 4	Cdc42-interacting protein 4	encountered in both interactomes
Q16630	35	30	Cleavage and polyadenylation specificity factor subunit 6	Cleavage and polyadenylation specificity factor subunit 6	encountered in both interactomes
Q16763	35	5	Ubiquitin-conjugating enzyme E2 S	Ubiquitin-conjugating enzyme E2 S	encountered in both interactomes
Q676U5	35	4	Autophagy-related protein 16-1	Autophagy-related protein 16-1	encountered in both interactomes
Q6NYC1	35	1	Bifunctional arginine demethylase and lysyl-hydroxylase JMJD6	Bifunctional arginine demethylase and lysyl-hydroxylase JMJD6	encountered in both interactomes
Q6P9B9	35	33	Integrator complex subunit 5	Integrator complex subunit 5	encountered in both interactomes
Q6ZVK8	35	33	8-oxo-dGDP phosphatase NUDT18	Nucleoside diphosphate-linked moiety X motif 18	encountered in both interactomes
Q86U70	35	25	LIM domain-binding protein 1	LIM domain-binding protein 1	encountered in both interactomes
Q8NI35	35	33	InaD-like protein	InaD-like protein	encountered in both interactomes
Q8TD10	35		Mirror-image polydactyly gene 1 protein	Mirror-image polydactyly gene 1 protein	encountered only in PICKLE 2.0	common in RHCP
Q92918	35	26	Mitogen-activated protein kinase kinase kinase kinase 1	Mitogen-activated protein kinase kinase kinase kinase 1	encountered in both interactomes
Q96L34	35	44	MAP/microtubule affinity-regulating kinase 4	MAP/microtubule affinity-regulating kinase 4	encountered in both interactomes
Q96RN5	35	34	Mediator of RNA polymerase II transcription subunit 15	Mediator of RNA polymerase II transcription subunit 15	encountered in both interactomes
Q96SN8	35	19	CDK5 regulatory subunit-associated protein 2	CDK5 regulatory subunit-associated protein 2	encountered in both interactomes
Q99613	35	24	Eukaryotic translation initiation factor 3 subunit C	Eukaryotic translation initiation factor 3 subunit C	encountered in both interactomes
Q99801	35	12	Homeobox protein Nkx-3.1	Homeobox protein Nkx-3.1	encountered in both interactomes
Q9BQA5	35	7	Histone H4 transcription factor	Histone H4 transcription factor	encountered in both interactomes
Q9BWF2	35	17	E3 ubiquitin-protein ligase TRAIP	TRAF-interacting protein	encountered in both interactomes
Q9BX66	35	23	Sorbin and SH3 domain-containing protein 1	Sorbin and SH3 domain-containing protein 1	encountered in both interactomes
Q9BZV1	35	5	UBX domain-containing protein 6	UBX domain-containing protein 6	encountered in both interactomes
Q9H6Z9	35	15	Egl nine homolog 3	Egl nine homolog 3	encountered in both interactomes
Q9H8T0	35	28	AKT-interacting protein	AKT-interacting protein	encountered in both interactomes
Q9NPB6	35	33	Partitioning defective 6 homolog alpha	Partitioning defective 6 homolog alpha	encountered in both interactomes
Q9NY65	35	7	Tubulin alpha-8 chain	Tubulin alpha-8 chain	encountered in both interactomes
Q9NZJ0	35	7	Denticleless protein homolog	Denticleless protein homolog	encountered in both interactomes
Q9UBS4	35	31	DnaJ homolog subfamily B member 11	DnaJ homolog subfamily B member 11	encountered in both interactomes
Q9UBW8	35	19	COP9 signalosome complex subunit 7a	COP9 signalosome complex subunit 7a	encountered in both interactomes
Q9UK41	35	16	Vacuolar protein sorting-associated protein 28 homolog	Vacuolar protein sorting-associated protein 28 homolog	encountered in both interactomes
Q9UPN9	35	21	E3 ubiquitin-protein ligase TRIM33	E3 ubiquitin-protein ligase TRIM33	encountered in both interactomes
Q9Y3A3	35	53	MOB-like protein phocein	MOB-like protein phocein	encountered in both interactomes
Q9Y5B9	35	28	FACT complex subunit SPT16	FACT complex subunit SPT16	encountered in both interactomes
O00268	34	27	Transcription initiation factor TFIID subunit 4	Transcription initiation factor TFIID subunit 4	encountered in both interactomes
O00422	34	42	Histone deacetylase complex subunit SAP18	Histone deacetylase complex subunit SAP18	encountered in both interactomes
O43609	34	7	Protein sprouty homolog 1	Protein sprouty homolog 1	encountered in both interactomes
O75486	34	30	Transcription initiation protein SPT3 homolog	Transcription initiation protein SPT3 homolog	encountered in both interactomes
O75496	34	25	Geminin	Geminin	encountered in both interactomes
O75581	34	19	Low-density lipoprotein receptor-related protein 6	Low-density lipoprotein receptor-related protein 6	encountered in both interactomes
P01009	34	22	Alpha-1-antitrypsin	Alpha-1-antitrypsin	encountered in both interactomes
P04843	34	22	Dolichyl-diphosphooligosaccharide--protein glycosyltransferase subunit 1	Dolichyl-diphosphooligosaccharide--protein glycosyltransferase subunit 1	encountered in both interactomes
P05060	34	30	Secretogranin-1	Secretogranin-1	encountered in both interactomes
P06576	34	27	ATP synthase subunit beta, mitochondrial	ATP synthase subunit beta, mitochondrial	encountered in both interactomes
P09012	34	17	U1 small nuclear ribonucleoprotein A	U1 small nuclear ribonucleoprotein A	encountered in both interactomes
P10114	34	32	Ras-related protein Rap-2a	Ras-related protein Rap-2a	encountered in both interactomes
P14174	34	29	Macrophage migration inhibitory factor	Macrophage migration inhibitory factor	encountered in both interactomes
P15531	34	27	Nucleoside diphosphate kinase A	Nucleoside diphosphate kinase A	encountered in both interactomes
P16401	34	10	Histone H1.5	Histone H1.5	encountered in both interactomes
P17661	34	18	Desmin	Desmin	encountered in both interactomes
P17931	34	18	Galectin-3	Galectin-3	encountered in both interactomes
P26373	34	24	60S ribosomal protein L13	60S ribosomal protein L13	encountered in both interactomes
P35711	34	7	Transcription factor SOX-5	Transcription factor SOX-5	encountered in both interactomes
P42575	34	28	Caspase-2	Caspase-2	encountered in both interactomes
P43034	34	22	Platelet-activating factor acetylhydrolase IB subunit alpha	Platelet-activating factor acetylhydrolase IB subunit alpha	encountered in both interactomes
Q02790	34	22	Peptidyl-prolyl cis-trans isomerase FKBP4	Peptidyl-prolyl cis-trans isomerase FKBP4	encountered in both interactomes
Q06481	34	26	Amyloid-like protein 2	Amyloid-like protein 2	encountered in both interactomes
Q12789	34	24	General transcription factor 3C polypeptide 1	General transcription factor 3C polypeptide 1	encountered in both interactomes
Q13127	34	20	RE1-silencing transcription factor	RE1-silencing transcription factor	encountered in both interactomes
Q14240	34	46	Eukaryotic initiation factor 4A-II	Eukaryotic initiation factor 4A-II	encountered in both interactomes
Q14684	34	32	Ribosomal RNA processing protein 1 homolog B	Ribosomal RNA processing protein 1 homolog B	encountered in both interactomes
Q14814	34	31	Myocyte-specific enhancer factor 2D	Myocyte-specific enhancer factor 2D	encountered in both interactomes
Q15154	34	20	Pericentriolar material 1 protein	Pericentriolar material 1 protein	encountered in both interactomes
Q15326	34	24	Zinc finger MYND domain-containing protein 11	Zinc finger MYND domain-containing protein 11	encountered in both interactomes
Q17RB8	34	1	LON peptidase N-terminal domain and RING finger protein 1	LON peptidase N-terminal domain and RING finger protein 1	encountered in both interactomes
Q5JVS0	34	33	Intracellular hyaluronan-binding protein 4	Intracellular hyaluronan-binding protein 4	encountered in both interactomes
Q86YD7	34	2	Protein FAM90A1	Protein FAM90A1	encountered in both interactomes
Q86YT6	34	16	E3 ubiquitin-protein ligase MIB1	E3 ubiquitin-protein ligase MIB1	encountered in both interactomes
Q8IUC6	34	22	TIR domain-containing adapter molecule 1	TIR domain-containing adapter molecule 1	encountered in both interactomes
Q8IXJ6	34	27	NAD-dependent protein deacetylase sirtuin-2	NAD-dependent deacetylase sirtuin-2	encountered in both interactomes
Q8N448	34	19	Ligand of Numb protein X 2	Ligand of Numb protein X 2	encountered in both interactomes
Q8N5U6	34	24	RING finger protein 10	RING finger protein 10	encountered in both interactomes
Q8N7H5	34	13	RNA polymerase II-associated factor 1 homolog	RNA polymerase II-associated factor 1 homolog	encountered in both interactomes
Q8NEC5	34	9	Cation channel sperm-associated protein 1	Cation channel sperm-associated protein 1	encountered in both interactomes
Q8WTS6	34	18	Histone-lysine N-methyltransferase SETD7	Histone-lysine N-methyltransferase SETD7	encountered in both interactomes
Q92560	34	12	Ubiquitin carboxyl-terminal hydrolase BAP1	Ubiquitin carboxyl-terminal hydrolase BAP1	encountered in both interactomes
Q96T88	34	13	E3 ubiquitin-protein ligase UHRF1	E3 ubiquitin-protein ligase UHRF1	encountered in both interactomes
Q9HAU0	34	28	Pleckstrin homology domain-containing family A member 5	Pleckstrin homology domain-containing family A member 5	encountered in both interactomes
Q9NQC7	34	26	Ubiquitin carboxyl-terminal hydrolase CYLD	Ubiquitin carboxyl-terminal hydrolase CYLD	encountered in both interactomes
Q9NQT4	34	22	Exosome complex component RRP46	Exosome complex component RRP46	encountered in both interactomes
Q9NV70	34	30	Exocyst complex component 1	Exocyst complex component 1	encountered in both interactomes
Q9UJX6	34	21	Anaphase-promoting complex subunit 2	Anaphase-promoting complex subunit 2	encountered in both interactomes
Q9Y244	34	14	Proteasome maturation protein	Proteasome maturation protein	encountered in both interactomes
Q9Y333	34	22	U6 snRNA-associated Sm-like protein LSm2	U6 snRNA-associated Sm-like protein LSm2	encountered in both interactomes
Q9Y371	34	17	Endophilin-B1	Endophilin-B1	encountered in both interactomes
Q9Y385	34	14	Ubiquitin-conjugating enzyme E2 J1	Ubiquitin-conjugating enzyme E2 J1	encountered in both interactomes
Q9Y6R4	34	28	Mitogen-activated protein kinase kinase kinase 4	Mitogen-activated protein kinase kinase kinase 4	encountered in both interactomes
O00762	33	12	Ubiquitin-conjugating enzyme E2 C	Ubiquitin-conjugating enzyme E2 C	encountered in both interactomes
O43242	33	19	26S proteasome non-ATPase regulatory subunit 3	26S proteasome non-ATPase regulatory subunit 3	encountered in both interactomes
O43734	33	11	Adapter protein CIKS	Adapter protein CIKS	encountered in both interactomes
O60238	33	21	BCL2/adenovirus E1B 19 kDa protein-interacting protein 3-like	BCL2/adenovirus E1B 19 kDa protein-interacting protein 3-like	encountered in both interactomes
O60941	33	18	Dystrobrevin beta	Dystrobrevin beta	encountered in both interactomes
O75150	33	11	E3 ubiquitin-protein ligase BRE1B	E3 ubiquitin-protein ligase BRE1B	encountered in both interactomes
O75369	33	22	Filamin-B	Filamin-B	encountered in both interactomes
O75385	33	5	Serine/threonine-protein kinase ULK1	Serine/threonine-protein kinase ULK1	encountered in both interactomes
O75525	33	21	KH domain-containing, RNA-binding, signal transduction-associated protein 3	KH domain-containing, RNA-binding, signal transduction-associated protein 3	encountered in both interactomes
O75674	33	30	TOM1-like protein 1	TOM1-like protein 1	encountered in both interactomes
O75943	33	24	Cell cycle checkpoint protein RAD17	Cell cycle checkpoint protein RAD17	encountered in both interactomes
O94762	33	31	ATP-dependent DNA helicase Q5	ATP-dependent DNA helicase Q5	encountered in both interactomes
O94906	33	20	Pre-mRNA-processing factor 6	Pre-mRNA-processing factor 6	encountered in both interactomes
P00441	33	27	Superoxide dismutase "Cu-Zn"	Superoxide dismutase [Cu-Zn]	encountered in both interactomes
P05023	33	19	Sodium/potassium-transporting ATPase subunit alpha-1	Sodium/potassium-transporting ATPase subunit alpha-1 (Na(+)/K(+) ATPase alpha-1 subunit)	encountered in both interactomes
P05198	33	25	Eukaryotic translation initiation factor 2 subunit 1	Eukaryotic translation initiation factor 2 subunit 1	encountered in both interactomes
P16188	33	2	HLA class I histocompatibility antigen, A-30 alpha chain	HLA class I histocompatibility antigen, A-30 alpha chain	encountered in both interactomes
P17600	33	29	Synapsin-1	Synapsin-1	encountered in both interactomes
P18074	33	19	TFIIH basal transcription factor complex helicase XPD subunit	TFIIH basal transcription factor complex helicase XPD subunit	encountered in both interactomes
P19532	33	49	Transcription factor E3	Transcription factor E3	encountered in both interactomes
P25705	33	21	ATP synthase subunit alpha, mitochondrial	ATP synthase subunit alpha, mitochondrial	encountered in both interactomes
P27708	33	32	CAD protein	CAD protein [Includes: Glutamine-dependent carbamoyl-phosphate synthase (EC 6.3.5.5); Aspartate carbamoyltransferase (EC 2.1.3.2); Dihydroorotase	encountered in both interactomes
P30084	33	23	Enoyl-CoA hydratase, mitochondrial	Enoyl-CoA hydratase, mitochondrial	encountered in both interactomes
P31942	33	18	Heterogeneous nuclear ribonucleoprotein H3	Heterogeneous nuclear ribonucleoprotein H3	encountered in both interactomes
P33240	33	24	Cleavage stimulation factor subunit 2	Cleavage stimulation factor subunit 2	encountered in both interactomes
P35580	33	33	Myosin-10	Myosin-10	encountered in both interactomes
P45974	33	8	Ubiquitin carboxyl-terminal hydrolase 5	Ubiquitin carboxyl-terminal hydrolase 5	encountered in both interactomes
P51955	33	24	Serine/threonine-protein kinase Nek2	Serine/threonine-protein kinase Nek2	encountered in both interactomes
P54652	33	15	Heat shock-related 70 kDa protein 2	Heat shock-related 70 kDa protein 2	encountered in both interactomes
P62753	33	23	40S ribosomal protein S6	40S ribosomal protein S6	encountered in both interactomes
P63146	33	16	Ubiquitin-conjugating enzyme E2 B	Ubiquitin-conjugating enzyme E2 B	encountered in both interactomes
Q08499	33	10	cAMP-specific 3',5'-cyclic phosphodiesterase 4D	cAMP-specific 3',5'-cyclic phosphodiesterase 4D	encountered in both interactomes
Q08752	33	14	Peptidyl-prolyl cis-trans isomerase D	Peptidyl-prolyl cis-trans isomerase D	encountered in both interactomes
Q12931	33	18	Heat shock protein 75 kDa, mitochondrial	Heat shock protein 75 kDa, mitochondrial	encountered in both interactomes
Q13393	33	29	Phospholipase D1	Phospholipase D1	encountered in both interactomes
Q13627	33	22	Dual specificity tyrosine-phosphorylation-regulated kinase 1A	Dual specificity tyrosine-phosphorylation-regulated kinase 1A	encountered in both interactomes
Q13952	33	31	Nuclear transcription factor Y subunit gamma	Nuclear transcription factor Y subunit gamma	encountered in both interactomes
Q15149	33	23	Plectin	Plectin	encountered in both interactomes
Q15942	33	22	Zyxin	Zyxin	encountered in both interactomes
Q16827	33	9	Receptor-type tyrosine-protein phosphatase O	Receptor-type tyrosine-protein phosphatase O	encountered in both interactomes
Q6UXN9	33	32	WD repeat-containing protein 82	WD repeat-containing protein 82	encountered in both interactomes
Q86WJ1	33	25	Chromodomain-helicase-DNA-binding protein 1-like	Chromodomain-helicase-DNA-binding protein 1-like	encountered in both interactomes
Q8IWX8	33	4	Calcium homeostasis endoplasmic reticulum protein	Calcium homeostasis endoplasmic reticulum protein	encountered in both interactomes
Q8IYA8	33	3	Coiled-coil domain-containing protein 36	Coiled-coil domain-containing protein 36	encountered in both interactomes
Q8IYE0	33		Coiled-coil domain-containing protein 146	Coiled-coil domain-containing protein 146	encountered only in PICKLE 2.0	common in RHCP
Q8WTP8	33	2	Apoptosis-enhancing nuclease	Apoptosis-enhancing nuclease	encountered in both interactomes
Q92783	33	17	Signal transducing adapter molecule 1	Signal transducing adapter molecule 1	encountered in both interactomes
Q96C00	33	16	Zinc finger and BTB domain-containing protein 9	Zinc finger and BTB domain-containing protein 9	encountered in both interactomes
Q96CS3	33	28	FAS-associated factor 2	FAS-associated factor 2	encountered in both interactomes
Q96HR3	33	28	Mediator of RNA polymerase II transcription subunit 30	Mediator of RNA polymerase II transcription subunit 30	encountered in both interactomes
Q96ID5	33	32	Immunoglobulin superfamily member 21	Immunoglobulin superfamily member 21	encountered in both interactomes
Q96RL1	33	16	BRCA1-A complex subunit RAP80	BRCA1-A complex subunit RAP80	encountered in both interactomes
Q99638	33	27	Cell cycle checkpoint control protein RAD9A	Cell cycle checkpoint control protein RAD9A	encountered in both interactomes
Q9C005	33	12	Protein dpy-30 homolog	Protein dpy-30 homolog	encountered in both interactomes
Q9C026	33	8	E3 ubiquitin-protein ligase TRIM9	E3 ubiquitin-protein ligase TRIM9	encountered in both interactomes
Q9H0N5	33	32	Pterin-4-alpha-carbinolamine dehydratase 2	Pterin-4-alpha-carbinolamine dehydratase 2	encountered in both interactomes
Q9H160	33	29	Inhibitor of growth protein 2	Inhibitor of growth protein 2	encountered in both interactomes
Q9H4L4	33	18	Sentrin-specific protease 3	Sentrin-specific protease 3	encountered in both interactomes
Q9HD15	33	7	Steroid receptor RNA activator 1	Steroid receptor RNA activator 1	encountered in both interactomes
Q9NRM7	33	7	Serine/threonine-protein kinase LATS2	Serine/threonine-protein kinase LATS2	encountered in both interactomes
Q9NUL5	33		UPF0515 protein C19orf66	UPF0515 protein C19orf66	encountered only in PICKLE 2.0	common in RHCP
Q9UDY8	33	17	Mucosa-associated lymphoid tissue lymphoma translocation protein 1	Mucosa-associated lymphoid tissue lymphoma translocation protein 1	encountered in both interactomes
Q9UJX5	33	13	Anaphase-promoting complex subunit 4	Anaphase-promoting complex subunit 4	encountered in both interactomes
Q9UQM7	33	24	Calcium/calmodulin-dependent protein kinase type II subunit alpha	Calcium/calmodulin-dependent protein kinase type II subunit alpha	encountered in both interactomes
Q9Y239	33	15	Nucleotide-binding oligomerization domain-containing protein 1	Nucleotide-binding oligomerization domain-containing protein 1	encountered in both interactomes
Q9Y294	33	16	Histone chaperone ASF1A	Histone chaperone ASF1A	encountered in both interactomes
O00471	32	5	Exocyst complex component 5	Exocyst complex component 5	encountered in both interactomes
O14544	32	17	Suppressor of cytokine signaling 6	Suppressor of cytokine signaling 6	encountered in both interactomes
O14788	32	32	Tumor necrosis factor ligand superfamily member 11	Tumor necrosis factor ligand superfamily member 11	encountered in both interactomes
O14893	32	25	Gem-associated protein 2	Gem-associated protein 2	encountered in both interactomes
O14939	32	30	Phospholipase D2	Phospholipase D2	encountered in both interactomes
O15294	32	28	UDP-N-acetylglucosamine--peptide N-acetylglucosaminyltransferase 110 kDa subunit	UDP-N-acetylglucosamine--peptide N-acetylglucosaminyltransferase 110 kDa subunit	encountered in both interactomes
O15304	32	13	Apoptosis regulatory protein Siva	Apoptosis regulatory protein Siva	encountered in both interactomes
O15525	32	15	Transcription factor MafG	Transcription factor MafG	encountered in both interactomes
O43513	32	30	Mediator of RNA polymerase II transcription subunit 7	Mediator of RNA polymerase II transcription subunit 7	encountered in both interactomes
O43747	32	27	AP-1 complex subunit gamma-1	AP-1 complex subunit gamma-1	encountered in both interactomes
O43791	32	22	Speckle-type POZ protein	Speckle-type POZ protein	encountered in both interactomes
O43913	32	18	Origin recognition complex subunit 5	Origin recognition complex subunit 5	encountered in both interactomes
O75177	32	23	Calcium-responsive transactivator	Calcium-responsive transactivator	encountered in both interactomes
O75419	32	24	Cell division control protein 45 homolog	Cell division control protein 45 homolog	encountered in both interactomes
O94966	32	7	Ubiquitin carboxyl-terminal hydrolase 19	Ubiquitin carboxyl-terminal hydrolase 19	encountered in both interactomes
O95931	32	21	Chromobox protein homolog 7	Chromobox protein homolog 7	encountered in both interactomes
P01732	32	20	T-cell surface glycoprotein CD8 alpha chain	T-cell surface glycoprotein CD8 alpha chain	encountered in both interactomes
P01892	32	2	HLA class I histocompatibility antigen, A-2 alpha chain	HLA class I histocompatibility antigen, A-2 alpha chain	encountered in both interactomes
P02462	32	27	Collagen alpha-1(IV) chain	Collagen alpha-1	encountered in both interactomes
P04114	32	21	Apolipoprotein B-100	Apolipoprotein B-100	encountered in both interactomes
P04271	32	28	Protein S100-B	Protein S100-B	encountered in both interactomes
P09038	32	30	Fibroblast growth factor 2	Heparin-binding growth factor 2	encountered in both interactomes
P09958	32	30	Furin	Furin	encountered in both interactomes
P17948	32	27	Vascular endothelial growth factor receptor 1	Vascular endothelial growth factor receptor 1	encountered in both interactomes
P18887	32	28	DNA repair protein XRCC1	DNA repair protein XRCC1	encountered in both interactomes
P20929	32	15	Nebulin	Nebulin	encountered in both interactomes
P23193	32	27	Transcription elongation factor A protein 1	Transcription elongation factor A protein 1	encountered in both interactomes
P23467	32	13	Receptor-type tyrosine-protein phosphatase beta	Receptor-type tyrosine-protein phosphatase beta	encountered in both interactomes
P26196	32	12	Probable ATP-dependent RNA helicase DDX6	Probable ATP-dependent RNA helicase DDX6	encountered in both interactomes
P28066	32	14	Proteasome subunit alpha type-5	Proteasome subunit alpha type-5	encountered in both interactomes
P29083	32	29	General transcription factor IIE subunit 1	General transcription factor IIE subunit 1	encountered in both interactomes
P32927	32	29	Cytokine receptor common subunit beta	Cytokine receptor common subunit beta	encountered in both interactomes
P36575	32	29	Arrestin-C	Arrestin-C	encountered in both interactomes
P49257	32	8	Protein ERGIC-53	Protein ERGIC-53	encountered in both interactomes
P53041	32	28	Serine/threonine-protein phosphatase 5	Serine/threonine-protein phosphatase 5	encountered in both interactomes
P62316	32	28	Small nuclear ribonucleoprotein Sm D2	Small nuclear ribonucleoprotein Sm D2	encountered in both interactomes
P62508	32	23	Estrogen-related receptor gamma	Estrogen-related receptor gamma	encountered in both interactomes
P84996	32	17	Protein ALEX	Protein ALEX	encountered in both interactomes
Q02779	32	26	Mitogen-activated protein kinase kinase kinase 10	Mitogen-activated protein kinase kinase kinase 10	encountered in both interactomes
Q0VD86	32	2	Protein INCA1	Protein INCA1	encountered in both interactomes
Q10567	32	26	AP-1 complex subunit beta-1	AP-1 complex subunit beta-1	encountered in both interactomes
Q13043	32	19	Serine/threonine-protein kinase 4	Serine/threonine-protein kinase 4	encountered in both interactomes
Q13216	32	9	DNA excision repair protein ERCC-8	DNA excision repair protein ERCC-8	encountered in both interactomes
Q14005	32	29	Pro-interleukin-16	Pro-interleukin-16 [Cleaved into: Interleukin-16	encountered in both interactomes
Q14181	32	31	DNA polymerase alpha subunit B	DNA polymerase alpha subunit B	encountered in both interactomes
Q14324	32	2	Myosin-binding protein C, fast-type	Myosin-binding protein C, fast-type	encountered in both interactomes
Q15011	32	28	Homocysteine-responsive endoplasmic reticulum-resident ubiquitin-like domain member 1 protein	Homocysteine-responsive endoplasmic reticulum-resident ubiquitin-like domain member 1 protein	encountered in both interactomes
Q15019	32	28	Septin-2	Septin-2	encountered in both interactomes
Q15459	32	25	Splicing factor 3A subunit 1	Splicing factor 3A subunit 1	encountered in both interactomes
Q15544	32	28	Transcription initiation factor TFIID subunit 11	Transcription initiation factor TFIID subunit 11	encountered in both interactomes
Q2WGJ6	32		Kelch-like protein 38	Kelch-like protein 38	encountered only in PICKLE 2.0	common in RHCP
Q5T2W1	32	27	Na(+)/H(+) exchange regulatory cofactor NHE-RF3	Na(+)/H(+) exchange regulatory cofactor NHE-RF3	encountered in both interactomes
Q5VWX1	32	10	KH domain-containing, RNA-binding, signal transduction-associated protein 2	KH domain-containing, RNA-binding, signal transduction-associated protein 2	encountered in both interactomes
Q63HR2	32	9	Tensin-like C1 domain-containing phosphatase	Tensin-like C1 domain-containing phosphatase	encountered in both interactomes
Q7L273	32	2	BTB/POZ domain-containing protein KCTD9	BTB/POZ domain-containing protein KCTD9	encountered in both interactomes
Q8N6T3	32	10	ADP-ribosylation factor GTPase-activating protein 1	ADP-ribosylation factor GTPase-activating protein 1	encountered in both interactomes
Q8TAP4	32	19	LIM domain only protein 3	LIM domain only protein 3	encountered in both interactomes
Q96GG9	32	15	DCN1-like protein 1	DCN1-like protein 1	encountered in both interactomes
Q96JM7	32	4	Lethal(3)malignant brain tumor-like protein 3	Lethal(3)malignant brain tumor-like protein 3 (H-l(3)mbt-like protein 3) (L(3)mbt-like protein 3)	encountered in both interactomes
Q96PV4	32		Paraneoplastic antigen-like protein 5	Paraneoplastic antigen-like protein 5	encountered only in PICKLE 2.0	common in RHCP
Q96QZ7	32	28	Membrane-associated guanylate kinase, WW and PDZ domain-containing protein 1	Membrane-associated guanylate kinase, WW and PDZ domain-containing protein 1	encountered in both interactomes
Q99961	32	22	Endophilin-A2	Endophilin-A2	encountered in both interactomes
Q9BV68	32	15	E3 ubiquitin-protein ligase RNF126	RING finger protein 126	encountered in both interactomes
Q9NPF4	32	25	Probable tRNA N6-adenosine threonylcarbamoyltransferase	Probable tRNA threonylcarbamoyladenosine biosynthesis protein OSGEP	encountered in both interactomes
Q9NSC5	32	18	Homer protein homolog 3	Homer protein homolog 3	encountered in both interactomes
Q9NTX7	32	4	E3 ubiquitin-protein ligase RNF146	E3 ubiquitin-protein ligase RNF146	encountered in both interactomes
Q9P2K3	32	8	REST corepressor 3	REST corepressor 3	encountered in both interactomes
Q9UBW7	32	27	Zinc finger MYM-type protein 2	Zinc finger MYM-type protein 2	encountered in both interactomes
Q9Y2U5	32	21	Mitogen-activated protein kinase kinase kinase 2	Mitogen-activated protein kinase kinase kinase 2	encountered in both interactomes
Q9Y4L5	32	12	E3 ubiquitin-protein ligase RNF115	E3 ubiquitin-protein ligase RNF115	encountered in both interactomes
O14497	31	26	AT-rich interactive domain-containing protein 1A	AT-rich interactive domain-containing protein 1A	encountered in both interactomes
O15156	31	12	Zinc finger and BTB domain-containing protein 7B	Zinc finger and BTB domain-containing protein 7B	encountered in both interactomes
O15371	31	17	Eukaryotic translation initiation factor 3 subunit D	Eukaryotic translation initiation factor 3 subunit D	encountered in both interactomes
O43684	31	13	Mitotic checkpoint protein BUB3	Mitotic checkpoint protein BUB3	encountered in both interactomes
O43929	31	16	Origin recognition complex subunit 4	Origin recognition complex subunit 4	encountered in both interactomes
O60336	31	4	Mitogen-activated protein kinase-binding protein 1	Mitogen-activated protein kinase-binding protein 1	encountered in both interactomes
P00338	31	18	L-lactate dehydrogenase A chain	L-lactate dehydrogenase A chain	encountered in both interactomes
P07814	31	28	Bifunctional glutamate/proline--tRNA ligase	Bifunctional aminoacyl-tRNA synthetase	encountered in both interactomes
P08246	31	31	Neutrophil elastase	Neutrophil elastase	encountered in both interactomes
P13746	31		HLA class I histocompatibility antigen, A-11 alpha chain	HLA class I histocompatibility antigen, A-11 alpha chain	encountered only in PICKLE 2.0	common in RHCP
P14784	31	29	Interleukin-2 receptor subunit beta	Interleukin-2 receptor subunit beta	encountered in both interactomes
P16284	31	25	Platelet endothelial cell adhesion molecule	Platelet endothelial cell adhesion molecule	encountered in both interactomes
P17936	31	29	Insulin-like growth factor-binding protein 3	Insulin-like growth factor-binding protein 3	encountered in both interactomes
P20336	31	19	Ras-related protein Rab-3A	Ras-related protein Rab-3A	encountered in both interactomes
P27487	31	26	Dipeptidyl peptidase 4	Dipeptidyl peptidase 4	encountered in both interactomes
P27701	31	24	CD82 antigen	CD82 antigen	encountered in both interactomes
P30443	31	14	HLA class I histocompatibility antigen, A-1 alpha chain	HLA class I histocompatibility antigen, A-1 alpha chain	encountered in both interactomes
P36507	31	20	Dual specificity mitogen-activated protein kinase kinase 2	Dual specificity mitogen-activated protein kinase kinase 2	encountered in both interactomes
P36896	31	21	Activin receptor type-1B	Activin receptor type-1B	encountered in both interactomes
P39687	31	26	Acidic leucine-rich nuclear phosphoprotein 32 family member A	Acidic leucine-rich nuclear phosphoprotein 32 family member A	encountered in both interactomes
P40424	31	24	Pre-B-cell leukemia transcription factor 1	Pre-B-cell leukemia transcription factor 1	encountered in both interactomes
P43354	31	29	Nuclear receptor subfamily 4 group A member 2	Nuclear receptor subfamily 4 group A member 2	encountered in both interactomes
P48443	31	30	Retinoic acid receptor RXR-gamma	Retinoic acid receptor RXR-gamma	encountered in both interactomes
P49757	31	26	Protein numb homolog	Protein numb homolog	encountered in both interactomes
P51665	31	21	26S proteasome non-ATPase regulatory subunit 7	26S proteasome non-ATPase regulatory subunit 7	encountered in both interactomes
P53667	31	25	LIM domain kinase 1	LIM domain kinase 1	encountered in both interactomes
P60842	31	21	Eukaryotic initiation factor 4A-I	Eukaryotic initiation factor 4A-I	encountered in both interactomes
P62310	31	17	U6 snRNA-associated Sm-like protein LSm3	U6 snRNA-associated Sm-like protein LSm3	encountered in both interactomes
P62487	31	18	DNA-directed RNA polymerase II subunit RPB7	DNA-directed RNA polymerase II subunit RPB7	encountered in both interactomes
P62820	31	30	Ras-related protein Rab-1A	Ras-related protein Rab-1A	encountered in both interactomes
P63027	31	23	Vesicle-associated membrane protein 2	Vesicle-associated membrane protein 2	encountered in both interactomes
Q02447	31	26	Transcription factor Sp3	Transcription factor Sp3	encountered in both interactomes
Q03060	31	23	cAMP-responsive element modulator	cAMP-responsive element modulator	encountered in both interactomes
Q04912	31	28	Macrophage-stimulating protein receptor	Macrophage-stimulating protein receptor	encountered in both interactomes
Q07866	31	20	Kinesin light chain 1	Kinesin light chain 1	encountered in both interactomes
Q12972	31	24	Nuclear inhibitor of protein phosphatase 1	Nuclear inhibitor of protein phosphatase 1	encountered in both interactomes
Q13283	31	21	Ras GTPase-activating protein-binding protein 1	Ras GTPase-activating protein-binding protein 1	encountered in both interactomes
Q13415	31	29	Origin recognition complex subunit 1	Origin recognition complex subunit 1	encountered in both interactomes
Q13951	31	24	Core-binding factor subunit beta	Core-binding factor subunit beta	encountered in both interactomes
Q15276	31	19	Rab GTPase-binding effector protein 1	Rab GTPase-binding effector protein 1	encountered in both interactomes
Q15382	31	16	GTP-binding protein Rheb	GTP-binding protein Rheb	encountered in both interactomes
Q15759	31	22	Mitogen-activated protein kinase 11	Mitogen-activated protein kinase 11	encountered in both interactomes
Q16514	31	26	Transcription initiation factor TFIID subunit 12	Transcription initiation factor TFIID subunit 12	encountered in both interactomes
Q16625	31	21	Occludin	Occludin	encountered in both interactomes
Q16790	31	4	Carbonic anhydrase 9	Carbonic anhydrase 9	encountered in both interactomes
Q6UXH1	31	28	Cysteine-rich with EGF-like domain protein 2	Cysteine-rich with EGF-like domain protein 2	encountered in both interactomes
Q6Y7W6	31	31	PERQ amino acid-rich with GYF domain-containing protein 2	PERQ amino acid-rich with GYF domain-containing protein 2	encountered in both interactomes
Q7L576	31	21	Cytoplasmic FMR1-interacting protein 1	Cytoplasmic FMR1-interacting protein 1	encountered in both interactomes
Q8IW41	31	23	MAP kinase-activated protein kinase 5	MAP kinase-activated protein kinase 5	encountered in both interactomes
Q8IWS0	31	1	PHD finger protein 6	PHD finger protein 6	encountered in both interactomes
Q8IWV7	31	30	E3 ubiquitin-protein ligase UBR1	E3 ubiquitin-protein ligase UBR1	encountered in both interactomes
Q8IX15	31	1	Homeobox and leucine zipper protein Homez	Homeobox and leucine zipper protein Homez	encountered in both interactomes
Q8N201	31	29	Integrator complex subunit 1	Integrator complex subunit 1	encountered in both interactomes
Q8N3L3	31	3	Beta-taxilin	Beta-taxilin	encountered in both interactomes
Q8N7W2	31	12	BEN domain-containing protein 7	BEN domain-containing protein 7	encountered in both interactomes
Q8TF42	31	16	Ubiquitin-associated and SH3 domain-containing protein B	Ubiquitin-associated and SH3 domain-containing protein B	encountered in both interactomes
Q8WX92	31	17	Negative elongation factor B	Negative elongation factor B	encountered in both interactomes
Q96Q15	31	12	Serine/threonine-protein kinase SMG1	Serine/threonine-protein kinase SMG1	encountered in both interactomes
Q99615	31	14	DnaJ homolog subfamily C member 7	DnaJ homolog subfamily C member 7	encountered in both interactomes
Q9BUE0	31	29	Mediator of RNA polymerase II transcription subunit 18	Mediator of RNA polymerase II transcription subunit 18	encountered in both interactomes
Q9H7Z6	31	28	Histone acetyltransferase KAT8	Histone acetyltransferase KAT8	encountered in both interactomes
Q9HAW0	31	58	Transcription factor IIIB 50 kDa subunit	Transcription factor IIIB 50 kDa subunit	encountered in both interactomes
Q9NR28	31	19	Diablo homolog, mitochondrial	Diablo homolog, mitochondrial	encountered in both interactomes
Q9NVW2	31	22	E3 ubiquitin-protein ligase RLIM	E3 ubiquitin-protein ligase RLIM	encountered in both interactomes
Q9UGJ1	31	26	Gamma-tubulin complex component 4	Gamma-tubulin complex component 4	encountered in both interactomes
Q9UI95	31	16	Mitotic spindle assembly checkpoint protein MAD2B	Mitotic spindle assembly checkpoint protein MAD2B	encountered in both interactomes
Q9UIS9	31	26	Methyl-CpG-binding domain protein 1	Methyl-CpG-binding domain protein 1	encountered in both interactomes
Q9UK17	31	2	Potassium voltage-gated channel subfamily D member 3	Potassium voltage-gated channel subfamily D member 3	encountered in both interactomes
Q9UPN3	31	22	Microtubule-actin cross-linking factor 1, isoforms 1/2/3/5	Microtubule-actin cross-linking factor 1, isoforms 1/2/3/5	encountered in both interactomes
Q9Y2W2	31	21	WW domain-binding protein 11	WW domain-binding protein 11	encountered in both interactomes
Q9Y2X0	31	27	Mediator of RNA polymerase II transcription subunit 16	Mediator of RNA polymerase II transcription subunit 16	encountered in both interactomes
Q9Y490	31	28	Talin-1	Talin-1	encountered in both interactomes
Q9Y5B8	31	8	Nucleoside diphosphate kinase 7	Nucleoside diphosphate kinase 7	encountered in both interactomes
Q9Y5X1	31	24	Sorting nexin-9	Sorting nexin-9	encountered in both interactomes
O00311	30	20	Cell division cycle 7-related protein kinase	Cell division cycle 7-related protein kinase	encountered in both interactomes
O14490	30	20	Disks large-associated protein 1	Disks large-associated protein 1	encountered in both interactomes
O43187	30	24	Interleukin-1 receptor-associated kinase-like 2	Interleukin-1 receptor-associated kinase-like 2	encountered in both interactomes
O43516	30	19	WAS/WASL-interacting protein family member 1	WAS/WASL-interacting protein family member 1	encountered in both interactomes
O43602	30	11	Neuronal migration protein doublecortin	Neuronal migration protein doublecortin	encountered in both interactomes
O60333	30	19	Kinesin-like protein KIF1B	Kinesin-like protein KIF1B	encountered in both interactomes
O75030	30	21	Microphthalmia-associated transcription factor	Microphthalmia-associated transcription factor	encountered in both interactomes
O75340	30	28	Programmed cell death protein 6	Programmed cell death protein 6	encountered in both interactomes
O75618	30	28	Death effector domain-containing protein	Death effector domain-containing protein	encountered in both interactomes
O75955	30	17	Flotillin-1	Flotillin-1	encountered in both interactomes
O95467	30	14	Neuroendocrine secretory protein 55	Neuroendocrine secretory protein 55	encountered in both interactomes
O95551	30	14	Tyrosyl-DNA phosphodiesterase 2	Tyrosyl-DNA phosphodiesterase 2	encountered in both interactomes
O95644	30	17	Nuclear factor of activated T-cells, cytoplasmic 1	Nuclear factor of activated T-cells, cytoplasmic 1	encountered in both interactomes
P00505	30	31	Aspartate aminotransferase, mitochondrial	Aspartate aminotransferase, mitochondrial	encountered in both interactomes
P01024	30	29	Complement C3	Complement C3	encountered in both interactomes
P02792	30	19	Ferritin light chain	Ferritin light chain	encountered in both interactomes
P07585	30	28	Decorin	Decorin	encountered in both interactomes
P09493	30	15	Tropomyosin alpha-1 chain	Tropomyosin alpha-1 chain	encountered in both interactomes
P13639	30	22	Elongation factor 2	Elongation factor 2	encountered in both interactomes
P15692	30	24	Vascular endothelial growth factor A	Vascular endothelial growth factor A	encountered in both interactomes
P16144	30	25	Integrin beta-4	Integrin beta-4	encountered in both interactomes
P17302	30	25	Gap junction alpha-1 protein	Gap junction alpha-1 protein	encountered in both interactomes
P23025	30	25	DNA repair protein complementing XP-A cells	DNA repair protein complementing XP-A cells	encountered in both interactomes
P25208	30	24	Nuclear transcription factor Y subunit beta	Nuclear transcription factor Y subunit beta	encountered in both interactomes
P26447	30	27	Protein S100-A4	Protein S100-A4	encountered in both interactomes
P31785	30	22	Cytokine receptor common subunit gamma	Cytokine receptor common subunit gamma	encountered in both interactomes
P41227	30	14	N-alpha-acetyltransferase 10	N-alpha-acetyltransferase 10	encountered in both interactomes
P42261	30	25	Glutamate receptor 1	Glutamate receptor 1	encountered in both interactomes
P49790	30	29	Nuclear pore complex protein Nup153	Nuclear pore complex protein Nup153	encountered in both interactomes
P50281	30	24	Matrix metalloproteinase-14	Matrix metalloproteinase-14	encountered in both interactomes
P50502	30	23	Hsc70-interacting protein	Hsc70-interacting protein	encountered in both interactomes
P52434	30	26	DNA-directed RNA polymerases I, II, and III subunit RPABC3	DNA-directed RNA polymerases I, II, and III subunit RPABC3	encountered in both interactomes
P52907	30	22	F-actin-capping protein subunit alpha-1	F-actin-capping protein subunit alpha-1	encountered in both interactomes
P56693	30	28	Transcription factor SOX-10	Transcription factor SOX-10	encountered in both interactomes
P61604	30	29	10 kDa heat shock protein, mitochondrial	10 kDa heat shock protein, mitochondrial	encountered in both interactomes
P61764	30	25	Syntaxin-binding protein 1	Syntaxin-binding protein 1	encountered in both interactomes
P62263	30	25	40S ribosomal protein S14	40S ribosomal protein S14	encountered in both interactomes
P62745	30	27	Rho-related GTP-binding protein RhoB	Rho-related GTP-binding protein RhoB	encountered in both interactomes
P62829	30	25	60S ribosomal protein L23	60S ribosomal protein L23	encountered in both interactomes
P62995	30	19	Transformer-2 protein homolog beta	Transformer-2 protein homolog beta	encountered in both interactomes
P78314	30	23	SH3 domain-binding protein 2	SH3 domain-binding protein 2	encountered in both interactomes
P98161	30	25	Polycystin-1	Polycystin-1	encountered in both interactomes
Q01826	30	28	DNA-binding protein SATB1	DNA-binding protein SATB1	encountered in both interactomes
Q01860	30	58	POU domain, class 5, transcription factor 1	POU domain, class 5, transcription factor 1	encountered in both interactomes
Q02763	30	22	Angiopoietin-1 receptor	Angiopoietin-1 receptor	encountered in both interactomes
Q08050	30	16	Forkhead box protein M1	Forkhead box protein M1	encountered in both interactomes
Q13123	30	7	Protein Red	Protein Red	encountered in both interactomes
Q13561	30	17	Dynactin subunit 2	Dynactin subunit 2	encountered in both interactomes
Q15633	30	15	RISC-loading complex subunit TARBP2	RISC-loading complex subunit TARBP2	encountered in both interactomes
Q15819	30	20	Ubiquitin-conjugating enzyme E2 variant 2	Ubiquitin-conjugating enzyme E2 variant 2	encountered in both interactomes
Q5JST6	30	2	EF-hand domain-containing family member C2	EF-hand domain-containing family member C2	encountered in both interactomes
Q8IY31	30	10	Intraflagellar transport protein 20 homolog	Intraflagellar transport protein 20 homolog	encountered in both interactomes
Q8N0S2	30		Synaptonemal complex central element protein 1	Synaptonemal complex central element protein 1	encountered only in PICKLE 2.0	common in RHCP
Q8NFJ9	30	17	Bardet-Biedl syndrome 1 protein	Bardet-Biedl syndrome 1 protein	encountered in both interactomes
Q8TDY2	30	14	RB1-inducible coiled-coil protein 1	RB1-inducible coiled-coil protein 1	encountered in both interactomes
Q8TEC5	30	2	Putative E3 ubiquitin-protein ligase SH3RF2	Putative E3 ubiquitin-protein ligase SH3RF2	encountered in both interactomes
Q92945	30	18	Far upstream element-binding protein 2	Far upstream element-binding protein 2	encountered in both interactomes
Q96T76	30	18	MMS19 nucleotide excision repair protein homolog	MMS19 nucleotide excision repair protein homolog	encountered in both interactomes
Q99436	30	17	Proteasome subunit beta type-7	Proteasome subunit beta type-7	encountered in both interactomes
Q9BRX9	30	1	WD repeat domain-containing protein 83	WD repeat domain-containing protein 83	encountered in both interactomes
Q9BZS1	30	11	Forkhead box protein P3	Forkhead box protein P3	encountered in both interactomes
Q9GZT6	30	29	Coiled-coil domain-containing protein 90B, mitochondrial	Coiled-coil domain-containing protein 90B, mitochondrial	encountered in both interactomes
Q9H0F6	30	2	Sharpin	Sharpin	encountered in both interactomes
Q9H2K2	30	10	Tankyrase-2	Tankyrase-2	encountered in both interactomes
Q9H422	30	30	Homeodomain-interacting protein kinase 3	Homeodomain-interacting protein kinase 3	encountered in both interactomes
Q9H4P4	30	13	E3 ubiquitin-protein ligase NRDP1	E3 ubiquitin-protein ligase NRDP1	encountered in both interactomes
Q9NPD3	30	30	Exosome complex component RRP41	Exosome complex component RRP41	encountered in both interactomes
Q9NXR1	30	9	Nuclear distribution protein nudE homolog 1	Nuclear distribution protein nudE homolog 1	encountered in both interactomes
Q9NYL2	30	26	Mitogen-activated protein kinase kinase kinase MLT	Mitogen-activated protein kinase kinase kinase MLT	encountered in both interactomes
Q9P0L0	30	13	Vesicle-associated membrane protein-associated protein A	Vesicle-associated membrane protein-associated protein A	encountered in both interactomes
Q9P0V3	30	12	SH3 domain-binding protein 4	SH3 domain-binding protein 4	encountered in both interactomes
Q9UBY8	30		Protein CLN8	Protein CLN8	encountered only in PICKLE 2.0	common in RHCP
Q9UHD9	30	16	Ubiquilin-2	Ubiquilin-2	encountered in both interactomes
Q9UI08	30	20	Ena/VASP-like protein	Ena/VASP-like protein	encountered in both interactomes
Q9UJX4	30	20	Anaphase-promoting complex subunit 5	Anaphase-promoting complex subunit 5	encountered in both interactomes
Q9UM54	30	18	Unconventional myosin-VI	Myosin-VI	encountered in both interactomes
Q9UQF2	30	30	C-Jun-amino-terminal kinase-interacting protein 1	C-Jun-amino-terminal kinase-interacting protein 1	encountered in both interactomes
Q9Y508	30	14	E3 ubiquitin-protein ligase RNF114	RING finger protein 114	encountered in both interactomes
Q9Y6H5	30	18	Synphilin-1	Synphilin-1	encountered in both interactomes
Q9Y6W5	30	23	Wiskott-Aldrich syndrome protein family member 2	Wiskott-Aldrich syndrome protein family member 2	encountered in both interactomes
O00291	29	21	Huntingtin-interacting protein 1	Huntingtin-interacting protein 1	encountered in both interactomes
O14786	29	21	Neuropilin-1	Neuropilin-1	encountered in both interactomes
O14867	29	21	Transcription regulator protein BACH1	Transcription regulator protein BACH1	encountered in both interactomes
O15273	29	12	Telethonin	Telethonin	encountered in both interactomes
O75821	29	22	Eukaryotic translation initiation factor 3 subunit G	Eukaryotic translation initiation factor 3 subunit G	encountered in both interactomes
O75934	29	9	Pre-mRNA-splicing factor SPF27	Pre-mRNA-splicing factor SPF27	encountered in both interactomes
O95292	29	12	Vesicle-associated membrane protein-associated protein B/C	Vesicle-associated membrane protein-associated protein B/C	encountered in both interactomes
O95347	29	26	Structural maintenance of chromosomes protein 2	Structural maintenance of chromosomes protein 2	encountered in both interactomes
O95400	29	42	CD2 antigen cytoplasmic tail-binding protein 2	CD2 antigen cytoplasmic tail-binding protein 2	encountered in both interactomes
O96006	29	19	Zinc finger BED domain-containing protein 1	Zinc finger BED domain-containing protein 1	encountered in both interactomes
P00750	29	28	Tissue-type plasminogen activator	Tissue-type plasminogen activator	encountered in both interactomes
P01042	29	27	Kininogen-1	Kininogen-1	encountered in both interactomes
P05423	29	27	DNA-directed RNA polymerase III subunit RPC4	DNA-directed RNA polymerase III subunit RPC4	encountered in both interactomes
P09104	29	18	Gamma-enolase	Gamma-enolase	encountered in both interactomes
P11217	29	7	Glycogen phosphorylase, muscle form	Glycogen phosphorylase, muscle form	encountered in both interactomes
P17181	29	26	Interferon alpha/beta receptor 1	Interferon alpha/beta receptor 1	encountered in both interactomes
P21926	29	23	CD9 antigen	CD9 antigen	encountered in both interactomes
P30291	29	24	Wee1-like protein kinase	Wee1-like protein kinase	encountered in both interactomes
P30793	29	12	GTP cyclohydrolase 1	GTP cyclohydrolase 1	encountered in both interactomes
P35658	29	23	Nuclear pore complex protein Nup214	Nuclear pore complex protein Nup214	encountered in both interactomes
P41143	29	20	Delta-type opioid receptor	Delta-type opioid receptor	encountered in both interactomes
P43355	29	10	Melanoma-associated antigen 1	Melanoma-associated antigen 1	encountered in both interactomes
P43694	29	25	Transcription factor GATA-4	Transcription factor GATA-4	encountered in both interactomes
P48059	29	13	LIM and senescent cell antigen-like-containing domain protein 1	LIM and senescent cell antigen-like-containing domain protein 1	encountered in both interactomes
P48634	29	25	Protein PRRC2A	Protein PRRC2A	encountered in both interactomes
P50454	29	24	Serpin H1	Serpin H1	encountered in both interactomes
P51159	29	26	Ras-related protein Rab-27A	Ras-related protein Rab-27A	encountered in both interactomes
P51959	29	11	Cyclin-G1	Cyclin-G1	encountered in both interactomes
P52564	29	18	Dual specificity mitogen-activated protein kinase kinase 6	Dual specificity mitogen-activated protein kinase kinase 6	encountered in both interactomes
P53778	29	18	Mitogen-activated protein kinase 12	Mitogen-activated protein kinase 12	encountered in both interactomes
P55060	29	21	Exportin-2	Exportin-2	encountered in both interactomes
P59768	29	13	Guanine nucleotide-binding protein G(I)/G(S)/G(O) subunit gamma-2	Guanine nucleotide-binding protein G(I)/G(S)/G(O) subunit gamma-2	encountered in both interactomes
P61326	29	17	Protein mago nashi homolog	Protein mago nashi homolog	encountered in both interactomes
P62306	29	18	Small nuclear ribonucleoprotein F	Small nuclear ribonucleoprotein F	encountered in both interactomes
P78337	29	9	Pituitary homeobox 1	Pituitary homeobox 1	encountered in both interactomes
P84090	29	25	Enhancer of rudimentary homolog	Enhancer of rudimentary homolog	encountered in both interactomes
P86478	29		Proline-rich protein 20E	Proline-rich protein 20E	encountered only in PICKLE 2.0	common in RHCP
P86479	29		Proline-rich protein 20C	Proline-rich protein 20C	encountered only in PICKLE 2.0	common in RHCP
P86480	29		Proline-rich protein 20D	Proline-rich protein 20D	encountered only in PICKLE 2.0	common in RHCP
P86481	29		Proline-rich protein 20B	Proline-rich protein 20B	encountered only in PICKLE 2.0	common in RHCP
P86496	29		Proline-rich protein 20A	Proline-rich protein 20A	encountered only in PICKLE 2.0	common in RHCP
P98160	29	27	Basement membrane-specific heparan sulfate proteoglycan core protein	Basement membrane-specific heparan sulfate proteoglycan core protein	encountered in both interactomes
Q00994	29	18	Protein BEX3	Protein BEX3	encountered in both interactomes
Q03518	29	18	Antigen peptide transporter 1	Antigen peptide transporter 1	encountered in both interactomes
Q08170	29	16	Serine/arginine-rich splicing factor 4	Serine/arginine-rich splicing factor 4	encountered in both interactomes
Q08426	29	1	Peroxisomal bifunctional enzyme	Peroxisomal bifunctional enzyme	encountered in both interactomes
Q12879	29	23	Glutamate receptor ionotropic, NMDA 2A	Glutamate [NMDA] receptor subunit epsilon-1	encountered in both interactomes
Q13105	29	22	Zinc finger and BTB domain-containing protein 17	Zinc finger and BTB domain-containing protein 17	encountered in both interactomes
Q13596	29	17	Sorting nexin-1	Sorting nexin-1	encountered in both interactomes
Q13761	29	21	Runt-related transcription factor 3	Runt-related transcription factor 3	encountered in both interactomes
Q14526	29	20	Hypermethylated in cancer 1 protein	Hypermethylated in cancer 1 protein	encountered in both interactomes
Q15172	29	23	Serine/threonine-protein phosphatase 2A 56 kDa regulatory subunit alpha isoform	Serine/threonine-protein phosphatase 2A 56 kDa regulatory subunit alpha isoform	encountered in both interactomes
[truncated: 12,266 more rows]
[truncated: 1 more columns]
