# Supplementary material for: PICKLE 2.0: A human protein-protein interaction meta-database employing data integration via genetic information ontology
Source: PLoS One. 2017 Oct 12;12(10):e0186039. doi: 10.1371/journal.pone.0186039 (PMC5638325; doi:10.1371/journal.pone.0186039)
Supplement: S6 Table — (A) The UniProt IDs in PICKLE 2.0 with no associated Entrez Gene ID; (B) The UniProt IDs in PICKLE 2.0 associated with multiple Entrez Gene IDs; (C) The Entrez Gene IDs in PICKLE 2.0 associated with multiple UniProt IDs; (provided as a separate Excel file with three respective sheets). (XLSX) [file pone.0186039.s006.xlsx]

## Sheet: A.UniProt IDs with no gene ID
S6 Table: The correspondences between the UniProt_IDs and Entrez Gene IDs of the default PICKLE 2.0 (release 1) network at the two normalization levels.
A. The UniProt IDs in PICKLE 2.0 without no associated Entrez Gene ID
Note: The UniProt_IDs/Entrez Gene IDs in the default PICKLE 2.0 (release 1) network at the respective level which are not shown in Parts A-C have only one correspondent at the antipodal level
Accession	Entry Name	Full Name	Number of Interactions (Degree)
P30504	1C04_HUMAN	HLA class I histocompatibility antigen, Cw-4 alpha chain	37
O43261	LEU1_HUMAN	Leukemia-associated protein 1	19
P01871	IGHM_HUMAN	Ig mu chain C region	17
P30457	1A66_HUMAN	HLA class I histocompatibility antigen, A-66 alpha chain	15
Q8IVG9	HUNIN_HUMAN	Humanin	13
Q96L14	C170L_HUMAN	Cep170-like protein	11
Q8IWF7	U2D2L_HUMAN	Putative ubiquitin-conjugating enzyme E2 D2-like protein	11
Q8NHW5	RLA0L_HUMAN	60S acidic ribosomal protein P0-like	9
P01857	IGHG1_HUMAN	Ig gamma-1 chain C region	6
P01834	IGKC_HUMAN	Ig kappa chain C region	5
P30508	1C12_HUMAN	HLA class I histocompatibility antigen, Cw-12 alpha chain	5
Q8IZS5	OFCC1_HUMAN	Orofacial cleft 1 candidate gene 1 protein	4
Q9UN81	LORF1_HUMAN	LINE-1 retrotransposable element ORF1 protein	4
Q9H761	CN139_HUMAN	Putative uncharacterized protein encoded by LINC00341	4
P42356	PI4KA_HUMAN	Phosphatidylinositol 4-kinase alpha	4
P01876	IGHA1_HUMAN	Ig alpha-1 chain C region	4
P57078	RIPK4_HUMAN	Receptor-interacting serine/threonine-protein kinase 4	4
Q8IWN7	RP1L1_HUMAN	Retinitis pigmentosa 1-like 1 protein	4
P01880	IGHD_HUMAN	Ig delta chain C region	3
P0CG04	LAC1_HUMAN	Ig lambda-1 chain C regions	3
Q14695	K0087_HUMAN	Uncharacterized protein KIAA0087	3
Q6VEQ5	WASH2_HUMAN	WAS protein family homolog 2	3
Q92753	RORB_HUMAN	Nuclear receptor ROR-beta	3
Q96IX9	A26L1_HUMAN	Putative ankyrin repeat domain-containing protein 26-like 1	3
P01877	IGHA2_HUMAN	Ig alpha-2 chain C region	3
Q9Y2A0	T53G1_HUMAN	TP53-target gene 1 protein	3
Q8WZ33	MAFIP_HUMAN	MaFF-interacting protein	3
Q9HD43	PTPRH_HUMAN	Receptor-type tyrosine-protein phosphatase H	3
O75564	JERKY_HUMAN	Jerky protein homolog	3
Q9NX53	MUT7B_HUMAN	Exonuclease mut-7 homolog, isoform 5	2
Q9BRJ2	RM45_HUMAN	39S ribosomal protein L45, mitochondrial	2
Q08E93	F27E3_HUMAN	Protein FAM27E3	2
Q9HB07	MYG1_HUMAN	UPF0160 protein MYG1, mitochondrial	2
Q8N423	LIRB2_HUMAN	Leukocyte immunoglobulin-like receptor subfamily B member 2	2
P54792	DVLP1_HUMAN	Putative segment polarity protein dishevelled homolog DVL1P1	2
P28067	DMA_HUMAN	HLA class II histocompatibility antigen, DM alpha chain	2
P01616	KV203_HUMAN	Ig kappa chain V-II region MIL	2
Q9Y6C7	L3R2A_HUMAN	Putative uncharacterized protein encoded by LINC00312	2
P06727	APOA4_HUMAN	Apolipoprotein A-IV	2
Q8NEV8	EXPH5_HUMAN	Exophilin-5	2
Q07000	1C15_HUMAN	HLA class I histocompatibility antigen, Cw-15 alpha chain	2
A8CG34	P121C_HUMAN	Nuclear envelope pore membrane protein POM 121C	2
P62861	RS30_HUMAN	40S ribosomal protein S30	2
O15255	CXX1_HUMAN	CAAX box protein 1	2
Q5SWA1	PR15B_HUMAN	Protein phosphatase 1 regulatory subunit 15B	2
P01709	LV206_HUMAN	Ig lambda chain V-II region MGC	2
P03989	1B27_HUMAN	HLA class I histocompatibility antigen, B-27 alpha chain	2
Q16473	TENXA_HUMAN	Putative tenascin-XA	2
Q9BZK3	NACP1_HUMAN	Putative nascent polypeptide-associated complex subunit alpha-like protein	2
Q8NEA9	GMCLL_HUMAN	Putative germ cell-less protein-like 1-like	2
P01861	IGHG4_HUMAN	Ig gamma-4 chain C region	1
P30464	1B15_HUMAN	HLA class I histocompatibility antigen, B-15 alpha chain	1
Q5TI25	NBPFE_HUMAN	Neuroblastoma breakpoint family member 14	1
Q9P2N2	RHG28_HUMAN	Rho GTPase-activating protein 28	1
Q8TEP8	CE192_HUMAN	Centrosomal protein of 192 kDa	1
P18464	1B51_HUMAN	HLA class I histocompatibility antigen, B-51 alpha chain	1
Q6IPX3	TCAL6_HUMAN	Transcription elongation factor A protein-like 6	1
Q8NF67	A2012_HUMAN	Putative ankyrin repeat domain-containing protein 20A12 pseudogene	1
Q9C0I4	THS7B_HUMAN	Thrombospondin type-1 domain-containing protein 7B	1
Q9Y4D8	HECD4_HUMAN	Probable E3 ubiquitin-protein ligase HECTD4	1
P30455	1A36_HUMAN	HLA class I histocompatibility antigen, A-36 alpha chain	1
Q68DE3	K2018_HUMAN	Basic helix-loop-helix domain-containing protein KIAA2018	1
Q6ZTU2	E400N_HUMAN	EP400 N-terminal-like protein	1
P01891	1A68_HUMAN	HLA class I histocompatibility antigen, A-68 alpha chain	1
P30461	1B13_HUMAN	HLA class I histocompatibility antigen, B-13 alpha chain	1
P42694	HELZ_HUMAN	Probable helicase with zinc finger domain	1
Q9Y2W3	S45A1_HUMAN	Proton-associated sugar transporter A	1
P30481	1B44_HUMAN	HLA class I histocompatibility antigen, B-44 alpha chain	1
P01854	IGHE_HUMAN	Ig epsilon chain C region	1
Q92928	RAB1C_HUMAN	Putative Ras-related protein Rab-1C	1
A6NEW6	F90AG_HUMAN	Putative protein FAM90A16P/FAM90A17P	1
A8MYZ6	FOXO6_HUMAN	Forkhead box protein O6	1
P01848	TCA_HUMAN	T-cell receptor alpha chain C region	1
P30447	1A23_HUMAN	HLA class I histocompatibility antigen, A-23 alpha chain	1
P19835	CEL_HUMAN	Bile salt-activated lipase	1
P30460	1B08_HUMAN	HLA class I histocompatibility antigen, B-8 alpha chain	1
P30685	1B35_HUMAN	HLA class I histocompatibility antigen, B-35 alpha chain	1
Q6P474	PDXD2_HUMAN	Putative pyridoxal-dependent decarboxylase domain-containing protein 2	1
P30491	1B53_HUMAN	HLA class I histocompatibility antigen, B-53 alpha chain	1
Q8IZP2	ST134_HUMAN	Putative protein FAM10A4	1
Q9H7H1	RUIT1_HUMAN	Putative uncharacterized protein encoded by RUNX1-IT1	1
P18135	KV312_HUMAN	Ig kappa chain V-III region HAH	1
Q5YKI7	GGNB1_HUMAN	Putative gametogenetin-binding protein 1	1
O15428	PINL_HUMAN	Putative PIN1-like protein	1
O60756	BCE1_HUMAN	Putative protein BCE-1	1
A6NN06	U633A_HUMAN	Putative UPF0633 protein MGC21881	1
A4QPH2	PI4P2_HUMAN	Putative phosphatidylinositol 4-kinase alpha-like protein P2	1
A6NE52	K1875_HUMAN	WD repeat-containing protein KIAA1875	1
Q8N1I8	CAAS1_HUMAN	Putative uncharacterized protein encoded by CACTIN-AS1	1
P01772	HV311_HUMAN	Ig heavy chain V-III region KOL	1
P01860	IGHG3_HUMAN	Ig gamma-3 chain C region	1
P0CW24	PNM6A_HUMAN	Paraneoplastic antigen-like protein 6A	1
Q8NCU1	CN048_HUMAN	Putative uncharacterized protein encoded by LINC00521	1
A6NDS4	TBC3B_HUMAN	TBC1 domain family member 3B	1
A6NFL8	GG6LT_HUMAN	Putative golgin subfamily A member 6-like protein 20	1
P01594	KV102_HUMAN	Ig kappa chain V-I region AU	1
P01850	TRBC1_HUMAN	T-cell receptor beta-1 chain C region	1
P01859	IGHG2_HUMAN	Ig gamma-2 chain C region	1
Q8N1F1	C1AS1_HUMAN	Putative uncharacterized protein LRRC75A-AS1, mitochondrial	1
Q8IZP1	TBC3A_HUMAN	TBC1 domain family member 3	1
Q9NQF3	SERHL_HUMAN	Serine hydrolase-like protein	1
Q4V348	Z658B_HUMAN	Zinc finger protein 658B	1
Q9BYX7	ACTBM_HUMAN	Putative beta-actin-like protein 3	1
Q9H853	TBA4B_HUMAN	Putative tubulin-like protein alpha-4B	1
Q5SRD3	AGAP8_HUMAN	Arf-GAP with GTPase, ANK repeat and PH domain-containing protein 8	1
Q96LW2	SG494_HUMAN	Uncharacterized serine/threonine-protein kinase SgK494	1

## Sheet: B. One UniProt ID to many genes
S6 Table: The correspondences between the UniProt_IDs and Entrez Gene IDs of the default PICKLE 2.0 (release 1) network at the two normalization levels.
Part B. The UniProt IDs in PICKLE 2.0 associated with multiple Entrez Gene IDs
Note: The UniProt_IDs/Entrez Gene IDs in the default PICKLE 2.0 (release 1) network at the respective level which are not shown in Parts A-C have only one correspondent at the antipodal level
Accession	Entry Name	Full Name	Number of Entrez Gene IDs	Number of Interactions at the UniProt level (Degree)
P62158	CALM_HUMAN	Calmodulin	3	334
Q7Z3S9	NT2NL_HUMAN	Notch homolog 2 N-terminal-like protein	2	233
P68431	H31_HUMAN	Histone H3.1	10	201
Q16637	SMN_HUMAN	Survival motor neuron protein	2	189
P62805	H4_HUMAN	Histone H4	14	185
P60411	KR109_HUMAN	Keratin-associated protein 10-9	2	160
P08107	HSP71_HUMAN	Heat shock 70 kDa protein 1A/1B	2	156
Q13404	UB2V1_HUMAN	Ubiquitin-conjugating enzyme E2 variant 1	2	116
Q71DI3	H32_HUMAN	Histone H3.2	3	106
P84243	H33_HUMAN	Histone H3.3	2	87
Q16594	TAF9_HUMAN	Transcription initiation factor TFIID subunit 9	2	83
Q9BTE6	AASD1_HUMAN	Alanyl-tRNA editing protein Aarsd1	2	74
P60896	DSS1_HUMAN	26S proteasome complex subunit DSS1	2	71
P22392	NDKB_HUMAN	Nucleoside diphosphate kinase B	2	70
P35226	BMI1_HUMAN	Polycomb complex protein BMI-1	2	62
Q14129	DGCR6_HUMAN	Protein DGCR6	2	61
P49674	KC1E_HUMAN	Casein kinase I isoform epsilon	2	54
Q13748	TBA3C_HUMAN	Tubulin alpha-3C/D chain	2	51
Q9P0W5	SCHI1_HUMAN	Schwannomin-interacting protein 1	2	49
Q9BWG6	SCNM1_HUMAN	Sodium channel modifier 1	2	44
Q01850	CDR2_HUMAN	Cerebellar degeneration-related protein 2	2	43
Q01081	U2AF1_HUMAN	Splicing factor U2AF 35 kDa subunit	2	41
Q9NY65	TBA8_HUMAN	Tubulin alpha-8 chain	2	35
Q9UPN3	MACF1_HUMAN	Microtubule-actin cross-linking factor 1, isoforms 1/2/3/5	2	31
P86479	PR20C_HUMAN	Proline-rich protein 20C	5	29
P86496	PR20A_HUMAN	Proline-rich protein 20A	5	29
P86481	PR20B_HUMAN	Proline-rich protein 20B	5	29
P86478	PR20E_HUMAN	Proline-rich protein 20E	5	29
P86480	PR20D_HUMAN	Proline-rich protein 20D	5	29
P04908	H2A1B_HUMAN	Histone H2A type 1-B/E	2	28
O00418	EF2K_HUMAN	Eukaryotic elongation factor 2 kinase	2	26
P69905	HBA_HUMAN	Hemoglobin subunit alpha	2	26
O95073	FSBP_HUMAN	Fibrinogen silencer-binding protein	2	26
P62807	H2B1C_HUMAN	Histone H2B type 1-C/E/F/G/I	6	24
Q96D09	GASP2_HUMAN	G-protein coupled receptor-associated sorting protein 2	2	24
P0C0S8	H2A1_HUMAN	Histone H2A type 1	5	23
P35520	CBS_HUMAN	Cystathionine beta-synthase	2	23
Q6FI13	H2A2A_HUMAN	Histone H2A type 2-A	2	22
P0CAP1	MYZAP_HUMAN	Myocardial zonula adherens protein	3	21
Q8N2Z9	CENPS_HUMAN	Centromere protein S	2	21
Q16385	SSX2_HUMAN	Protein SSX2	2	20
Q9Y3E7	CHMP3_HUMAN	Charged multivesicular body protein 3	2	19
Q6P1K2	PMF1_HUMAN	Polyamine-modulated factor 1	2	19
Q86XR7	TCAM2_HUMAN	TIR domain-containing adapter molecule 2	2	19
P02489	CRYAA_HUMAN	Alpha-crystallin A chain	2	19
Q9Y3P9	RBGP1_HUMAN	Rab GTPase-activating protein 1	2	18
Q96PK6	RBM14_HUMAN	RNA-binding protein 14	2	18
P57737	CORO7_HUMAN	Coronin-7	2	16
Q15415	RBY1F_HUMAN	RNA-binding motif protein, Y chromosome, family 1 member F/J	2	16
Q13888	TF2H2_HUMAN	General transcription factor IIH subunit 2	2	15
P84101	SERF2_HUMAN	Small EDRK-rich factor 2	2	15
Q9H0Q3	FXYD6_HUMAN	FXYD domain-containing ion transport regulator 6	2	14
Q8IW19	APLF_HUMAN	Aprataxin and PNK-like factor	2	14
P57059	SIK1_HUMAN	Serine/threonine-protein kinase SIK1	2	13
P12532	KCRU_HUMAN	Creatine kinase U-type, mitochondrial	2	13
P59998	ARPC4_HUMAN	Actin-related protein 2/3 complex subunit 4	2	13
P43356	MAGA2_HUMAN	Melanoma-associated antigen 2	2	12
Q8IWZ3	ANKH1_HUMAN	Ankyrin repeat and KH domain-containing protein 1	2	11
P01909	DQA1_HUMAN	HLA class II histocompatibility antigen, DQ alpha 1 chain	2	11
P13236	CCL4_HUMAN	C-C motif chemokine 4	2	11
Q8NHZ7	MB3L2_HUMAN	Methyl-CpG-binding domain protein 3-like 2	2	10
Q9Y575	ASB3_HUMAN	Ankyrin repeat and SOCS box protein 3	2	9
Q96LI6	HSFY1_HUMAN	Heat shock transcription factor, Y-linked	2	9
P0C7H8	KRA23_HUMAN	Keratin-associated protein 2-3	2	9
P18621	RL17_HUMAN	60S ribosomal protein L17	2	9
Q9BQ83	SLX1_HUMAN	Structure-specific endonuclease subunit SLX1	2	9
P26718	NKG2D_HUMAN	NKG2-D type II integral membrane protein	2	9
P62854	RS26_HUMAN	40S ribosomal protein S26	2	9
P49356	FNTB_HUMAN	Protein farnesyltransferase subunit beta	2	9
Q9BYR9	KRA24_HUMAN	Keratin-associated protein 2-4	2	9
P0C0L4	CO4A_HUMAN	Complement C4-A	2	9
Q96BR1	SGK3_HUMAN	Serine/threonine-protein kinase Sgk3	2	9
Q59H18	TNI3K_HUMAN	Serine/threonine-protein kinase TNNI3K	2	8
Q02080	MEF2B_HUMAN	Myocyte-specific enhancer factor 2B	2	8
P16150	LEUK_HUMAN	Leukosialin	2	8
Q01534	TSPY1_HUMAN	Testis-specific Y-encoded protein 1	3	7
P0DML3	CSH2_HUMAN	Chorionic somatomammotropin hormone 2	2	7
Q9Y2D5	AKAP2_HUMAN	A-kinase anchor protein 2	2	7
P0C869	PA24B_HUMAN	Cytosolic phospholipase A2 beta	2	7
Q8NBE8	KLH23_HUMAN	Kelch-like protein 23	2	7
Q9NQ55	SSF1_HUMAN	Suppressor of SWI4 1 homolog	2	7
Q9NR80	ARHG4_HUMAN	Rho guanine nucleotide exchange factor 4	2	7
P78358	CTG1B_HUMAN	Cancer/testis antigen 1	2	7
P0DMM9	ST1A3_HUMAN	Sulfotransferase 1A3	3	6
P0DMN0	ST1A4_HUMAN	Sulfotransferase 1A4	3	6
P04745	AMY1_HUMAN	Alpha-amylase 1	3	6
Q9Y5P8	P2R3B_HUMAN	Serine/threonine-protein phosphatase 2A regulatory subunit B'' subunit beta	2	6
Q96JG8	MAGD4_HUMAN	Melanoma-associated antigen D4	2	6
P23610	F8I2_HUMAN	Factor VIII intron 22 protein	3	5
Q6P996	PDXD1_HUMAN	Pyridoxal-dependent decarboxylase domain-containing protein 1	2	5
P16619	CL3L1_HUMAN	C-C motif chemokine 3-like 1	2	5
Q8NDB6	FA156_HUMAN	Protein FAM156A/FAM156B	2	5
P36544	ACHA7_HUMAN	Neuronal acetylcholine receptor subunit alpha-7	2	5
P59665	DEF1_HUMAN	Neutrophil defensin 1	2	5
Q9GZY0	NXF2_HUMAN	Nuclear RNA export factor 2	2	5
O43508	TNF12_HUMAN	Tumor necrosis factor ligand superfamily member 12	2	5
P01562	IFNA1_HUMAN	Interferon alpha-1/13	2	5
P01233	CGHB_HUMAN	Choriogonadotropin subunit beta	4	4
P43631	KI2S2_HUMAN	Killer cell immunoglobulin-like receptor 2DS2	3	4
P30046	DOPD_HUMAN	D-dopachrome decarboxylase	2	4
P41271	NBL1_HUMAN	Neuroblastoma suppressor of tumorigenicity 1	2	4
Q9ULR0	ISY1_HUMAN	Pre-mRNA-splicing factor ISY1 homolog	2	4
O60224	SSX4_HUMAN	Protein SSX4	2	4
Q99666	RGPD5_HUMAN	RANBP2-like and GRIP domain-containing protein 5/6	2	4
P20231	TRYB2_HUMAN	Tryptase beta-2	2	4
Q9GZN2	TGIF2_HUMAN	Homeobox protein TGIF2	2	4
A5PLL7	TM189_HUMAN	Transmembrane protein 189	2	4
P27144	KAD4_HUMAN	Adenylate kinase 4, mitochondrial	2	4
O75920	SERF1_HUMAN	Small EDRK-rich factor 1	2	4
Q6P1K8	T2H2L_HUMAN	General transcription factor IIH subunit 2-like protein	2	4
Q8NG57	ELOA3_HUMAN	RNA polymerase II transcription factor SIII subunit A3	4	3
P47929	LEG7_HUMAN	Galectin-7	2	3
Q9NYW8	RBAK_HUMAN	RB-associated KRAB zinc finger protein	2	3
Q6ZTI6	F101A_HUMAN	Filamin-interacting protein FAM101A	2	3
P13928	ANXA8_HUMAN	Annexin A8	2	3
Q13068	GAGE4_HUMAN	G antigen 4	2	3
P50391	NPY4R_HUMAN	Neuropeptide Y receptor type 4	2	3
Q13069	GAGE5_HUMAN	G antigen 5	2	3
Q9BQ13	KCD14_HUMAN	BTB/POZ domain-containing protein KCTD14	2	3
Q9UBD0	HSFX1_HUMAN	Heat shock transcription factor, X-linked	2	3
Q7Z6K5	ARPIN_HUMAN	Arpin	2	3
O15263	DFB4A_HUMAN	Beta-defensin 4A	2	3
Q6NSH3	CT455_HUMAN	Cancer/testis antigen family 45 member A5	2	3
Q9Y6F8	CDY1_HUMAN	Testis-specific chromodomain protein Y 1	2	3
P04001	OPSG_HUMAN	Medium-wave-sensitive opsin 1	3	2
O14599	VCY2_HUMAN	Testis-specific basic protein Y 2	3	2
P0C0L5	CO4B_HUMAN	Complement C4-B	2	2
P0CG30	GSTT2_HUMAN	Glutathione S-transferase theta-2B	2	2
P86790	CCZ1B_HUMAN	Vacuolar fusion protein CCZ1 homolog B	2	2
P86791	CCZ1_HUMAN	Vacuolar fusion protein CCZ1 homolog	2	2
Q9H1X3	DJC25_HUMAN	DnaJ homolog subfamily C member 25	2	2
P30042	ES1_HUMAN	ES1 protein homolog, mitochondrial	2	2
P43362	MAGA9_HUMAN	Melanoma-associated antigen 9	2	2
Q9HD64	XAGE1_HUMAN	X antigen family member 1	2	2
Q15269	PWP2_HUMAN	Periodic tryptophan protein 2 homolog	2	2
P33765	AA3R_HUMAN	Adenosine receptor A3	2	2
Q8N109	KI2LA_HUMAN	Killer cell immunoglobulin-like receptor 2DL5A	2	2
Q9NVU0	RPC5_HUMAN	DNA-directed RNA polymerase III subunit RPC5	2	2
P81534	D103A_HUMAN	Beta-defensin 103	2	2
Q9HBT8	Z286A_HUMAN	Zinc finger protein 286A	2	2
Q13360	ZN177_HUMAN	Zinc finger protein 177	2	2
Q9ULZ0	T53G3_HUMAN	TP53-target gene 3 protein	8	1
P0CL80	GG12F_HUMAN	G antigen 12F	5	1
P0CL82	GG12I_HUMAN	G antigen 12I	4	1
A1L429	GG12C_HUMAN	G antigen 12B/C/D/E	4	1
O76087	GAGE7_HUMAN	G antigen 7	4	1
P0CL81	GG12G_HUMAN	G antigen 12G	4	1
Q9UND3	NPIA1_HUMAN	Nuclear pore complex-interacting protein family member A1	3	1
O14598	VCY1_HUMAN	Testis-specific basic protein Y 1	2	1
Q8N328	PGBD3_HUMAN	PiggyBac transposable element-derived protein 3	2	1
Q8TCD1	CR032_HUMAN	UPF0729 protein C18orf32	2	1
O15482	TEX28_HUMAN	Testis-specific protein TEX28	2	1
B7ZW38	HNRC3_HUMAN	Heterogeneous nuclear ribonucleoprotein C-like 3	2	1
Q9Y6Q2	STON1_HUMAN	Stonin-1	2	1
B2RC85	R10B2_HUMAN	Radial spoke head 10 homolog B2	2	1
Q9NS26	SPNXA_HUMAN	Sperm protein associated with the nucleus on the X chromosome A	2	1
A2RUG3	XKRY2_HUMAN	Testis-specific XK-related protein, Y-linked 2	2	1
Q8N4A0	GALT4_HUMAN	Polypeptide N-acetylgalactosaminyltransferase 4	2	1
P02810	PRPC_HUMAN	Salivary acidic proline-rich phosphoprotein 1/2	2	1
Q8NHW4	CC4L_HUMAN	C-C motif chemokine 4-like	2	1
Q5JTY5	CBWD3_HUMAN	COBW domain-containing protein 3	2	1
P0CW19	LIMS3_HUMAN	LIM and senescent cell antigen-like-containing domain protein 3	2	1
Q96P26	5NT1B_HUMAN	Cytosolic 5'-nucleotidase 1B	2	1
O75144	ICOSL_HUMAN	ICOS ligand	2	1
P0CW20	LIM3L_HUMAN	LIM and senescent cell antigen-like-containing domain protein 3-like	2	1
P0CI00	Z705B_HUMAN	Putative zinc finger protein 705B	2	1
Q9NX45	SOLH2_HUMAN	Spermatogenesis- and oogenesis-specific basic helix-loop-helix-containing protein 2	2	1
O76011	KRT34_HUMAN	Keratin, type I cuticular Ha4	2	1
Q9Y3B3	TMED7_HUMAN	Transmembrane emp24 domain-containing protein 7	2	1
Q9UEU5	GGE2D_HUMAN	G antigen 2D	2	1
Q580R0	CB027_HUMAN	Uncharacterized protein C2orf27	2	1
P0DMR1	HNRC4_HUMAN	Heterogeneous nuclear ribonucleoprotein C-like 4	2	1
P49914	MTHFS_HUMAN	5-formyltetrahydrofolate cyclo-ligase	2	1

## Sheet: C. One gene to many Uniprot_IDs
S6 Table: The correspondences between the UniProt_IDs and Entrez Gene IDs of the default PICKLE 2.0 (release 1) network at the two normalization levels.
C. The Entrez GeneIDs in PICKLE 2.0 associated with multiple UniProt IDs
Note: The UniProt_IDs/Entrez Gene IDs in the default PICKLE 2.0 (release 1) network at the respective level which are not shown in Parts A-C have only one correspondent at the antipodal level
Entrez Gene ID	Gene Symbol	Gene Name	Number of associated UniProt IDs	Number of interactions at the gene level
3106	HLA-B	major histocompatibility complex, class I, B	7	270
1029	CDKN2A	cyclin-dependent kinase inhibitor 2A	2	145
387522	TMEM189-UBE2V1	TMEM189-UBE2V1 readthrough	2	107
5621	PRNP	prion protein	2	89
102157402	AK6	adenylate kinase 6	2	62
2778	GNAS	GNAS complex locus	4	40
3105	HLA-A	major histocompatibility complex, class I, A	6	39
1962	EHHADH	enoyl-CoA, hydratase/3-hydroxyacyl CoA dehydrogenase	2	31
25788	RAD54B	RAD54 homolog B (S. cerevisiae)	2	28
9378	NRXN1	neurexin 1	2	28
7112	TMPO	thymopoietin	2	26
2122	MECOM	MDS1 and EVI1 complex locus	2	26
122183	PRR20A	proline rich 20A	5	25
1523	CUX1	cut-like homeobox 1	2	24
81488	POLR2M	polymerase (RNA) II (DNA directed) polypeptide M	3	22
6399	TRAPPC2	trafficking protein particle complex 2	2	22
55734	ZFP64	ZFP64 zinc finger protein	2	21
643314	KIAA0754	KIAA0754	2	21
4666	NACA	nascent polypeptide-associated complex alpha subunit	2	19
3017	HIST1H2BD	histone cluster 1, H2bd	2	18
386678	KRTAP10-11	keratin associated protein 10-11	2	15
2844	GPR21	G protein-coupled receptor 21	2	13
25764	HYPK	huntingtin interacting protein K	2	13
9379	NRXN2	neurexin 2	2	10
796	CALCA	calcitonin-related polypeptide alpha	2	10
3123	HLA-DRB1	major histocompatibility complex, class II, DR beta 1	5	9
728340	GTF2H2C	GTF2H2 family member C	2	9
100302736	TMED7-TICAM2	TMED7-TICAM2 readthrough	2	9
85294	KRTAP2-4	keratin associated protein 2-4	2	9
140290	TCP10L	t-complex 10-like	2	9
6218	RPS17	ribosomal protein S17	2	8
51207	DUSP13	dual specificity phosphatase 13	2	8
10887	PROKR1	prokineticin receptor 1	2	7
6818	SULT1A3	sulfotransferase family, cytosolic, 1A, phenol-preferring, member 3	2	7
388372	CCL4L1	chemokine (C-C motif) ligand 4-like 1	2	7
163590	TOR1AIP2	torsin A interacting protein 2	2	7
9465	AKAP7	A kinase (PRKA) anchor protein 7	2	6
54921	CHTF8	CTF8, chromosome transmission fidelity factor 8 homolog (S. cerevisiae)	2	6
27113	BBC3	BCL2 binding component 3	2	6
9369	NRXN3	neurexin 3	2	5
401388	C7orf76	chromosome 7 open reading frame 76	2	5
22891	ZNF365	zinc finger protein 365	2	5
388389	CCDC103	coiled-coil domain containing 103	2	5
9910	RABGAP1L	RAB GTPase activating protein 1-like	2	5
10326	SIRPB1	signal-regulatory protein beta 1	2	5
3804	KIR2DL3	killer cell immunoglobulin-like receptor, two domains, long cytoplasmic tail, 3	2	5
1442	CSH1	chorionic somatomammotropin hormone 1 (placental lactogen)	2	5
721	C4B	complement component 4B (Chido blood group)	2	5
100526842	RPL17-C18orf32	RPL17-C18orf32 readthrough	2	4
100037417	DDTL	D-dopachrome tautomerase-like	2	4
706	TSPO	translocator protein (18kDa)	2	3
4338	MOCS2	molybdenum cofactor synthesis 2	2	3
2543	GAGE1	G antigen 1	2	3
79741	CCDC7	coiled-coil domain containing 7	2	3
101929857	LOC101929857	sulfotransferase 1A3/1A4-like	2	3
445329	SULT1A4	sulfotransferase family, cytosolic, 1A, phenol-preferring, member 4	2	3
7177	TPSAB1	tryptase alpha/beta 1	2	3
653145	ANXA8	annexin A8	2	3
221960	CCZ1B	CCZ1 vacuolar protein trafficking and biogenesis associated homolog B (S. cerevisiae)	2	2
89832	CHRFAM7A	CHRNA7 (cholinergic receptor, nicotinic, alpha 7, exons 5-10) and FAM7A (family with sequence similarity 7A, exons A-E) fusion	2	2
140	ADORA3	adenosine A3 receptor	2	2
26748	GAGE12I	G antigen 12I	4	1
642778	NPIPA3	nuclear pore complex interacting protein family, member A3	3	1
100289087	TSPY10	testis specific protein, Y-linked 10	2	1
96626	LIMS3	LIM and senescent cell antigen-like domains 3	2	1
2953	GSTT2	glutathione S-transferase theta 2 (gene/pseudogene)	2	1
3742	KCNA6	potassium voltage-gated channel, shaker-related subfamily, member 6	2	1
728113	ANXA8L1	annexin A8-like 1	2	1
64663	SPANXC	SPANX family, member C	2	1
10407	SPAG11B	sperm associated antigen 11B	2	1
3806	KIR2DS1	killer cell immunoglobulin-like receptor, two domains, short cytoplasmic tail, 1	2	1
51622	CCZ1	CCZ1 vacuolar protein trafficking and biogenesis associated homolog (S. cerevisiae)	2	1
27433	TOR2A	torsin family 2, member A	2	1
649330	HNRNPCL3	heterogeneous nuclear ribonucleoprotein C-like 3	2	1
84968	PNMA6A	paraneoplastic Ma antigen family member 6A	2	1
2576	GAGE4	G antigen 4	2	1
642799	NPIPA2	nuclear pore complex interacting protein family, member A2	2	1
9082	XKRY	XK, Kell blood group complex subunit-related, Y-linked	2	1
100131980	ZNF705G	zinc finger protein 705G	2	1
642517	AGAP9	ArfGAP with GTPase domain, ankyrin repeat and PH domain 9	2	1
26749	GAGE2E	G antigen 2E	2	1
728137	TSPY3	testis specific protein, Y-linked 3	2	1
158055	C9orf163	chromosome 9 open reading frame 163	2	1
220869	CBWD5	COBW domain containing 5	2	1
